# Supplementary material for: Arthropod relationships revealed by phylogenomic analysis of nuclear protein-coding sequences
Source: Springer Nature journal article supplement (doi:10.1038/nature08742), 2010-02-01
Supplement: 41586_2010_BFnature08742_MOESM267_ESM.pdf [file 41586_2010_BFnature08742_MOESM267_ESM.pdf]

## SUPPLEMENTARY INFORMATION

**Supplementary Figure 1. Flow chart of activities leading to the phylogenetic trees of Figures 1 & 2.**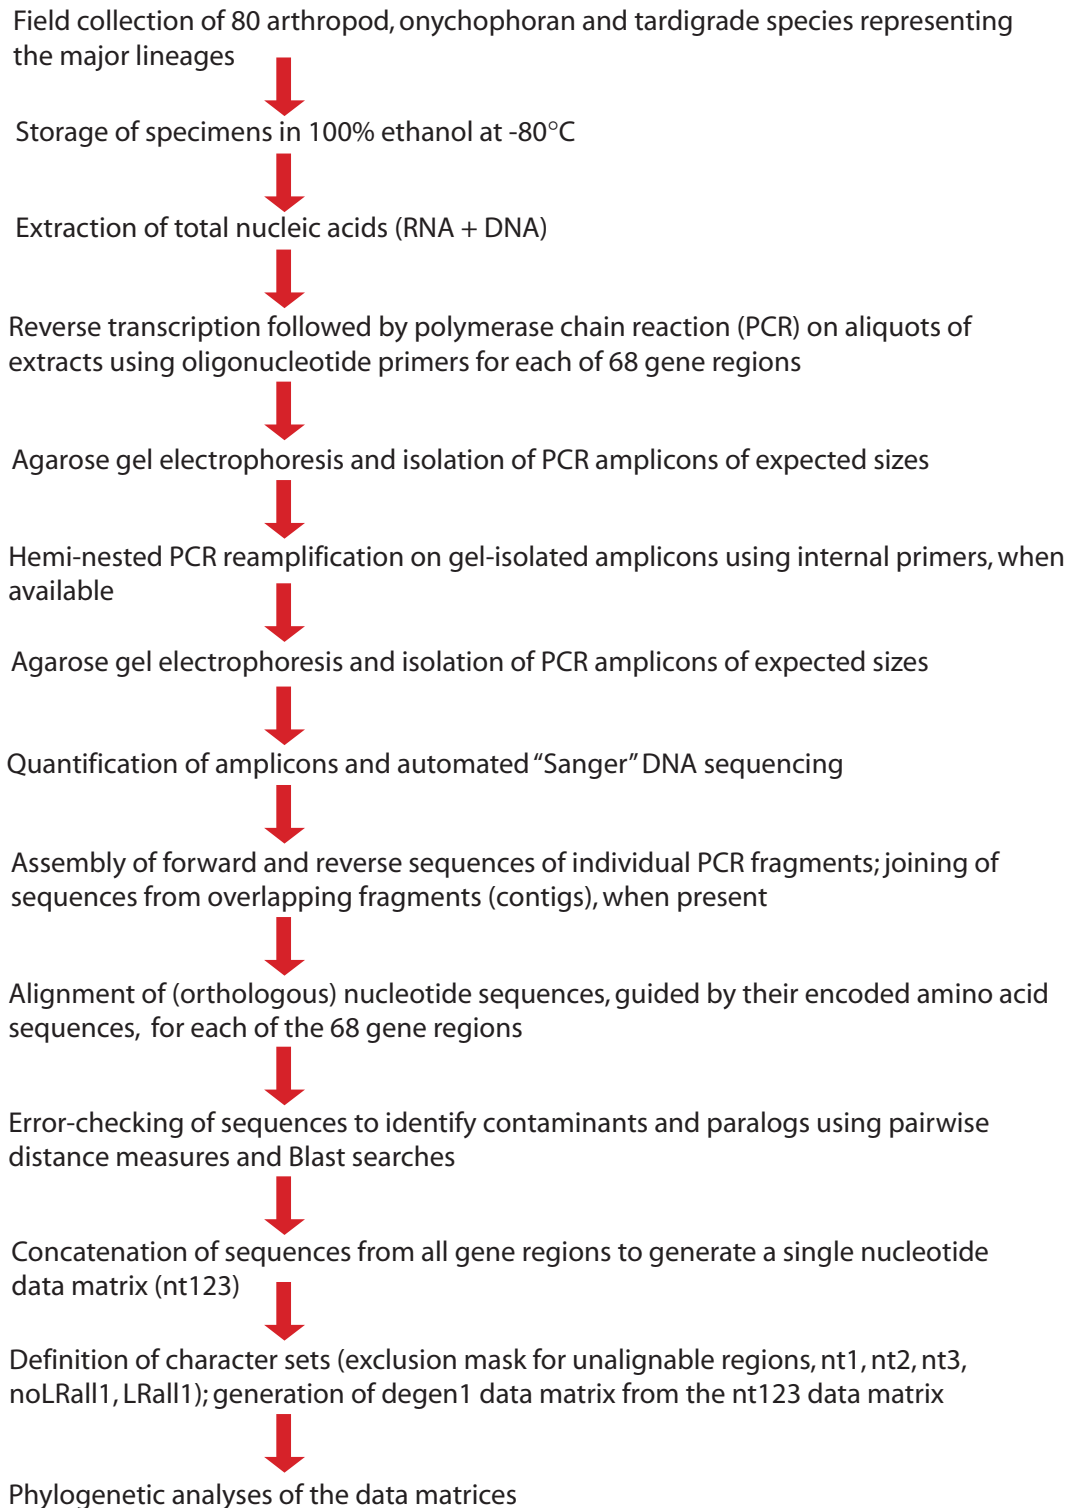

### Supplementary Figure 2. Likelihood analysis of nt1+nt2 data set.

Garli maximum likelihood topology -- best of 450 heuristic searches;  
GTR+gamma+Inv model of nucleotide substitution;  
non-parametric bootstrap percentages are labeled at nodes and  
are derived from heuristic analysis of 1000 pseudoreplicates;  
80 taxa, 62 genes;  
nt1 + nt2 data set

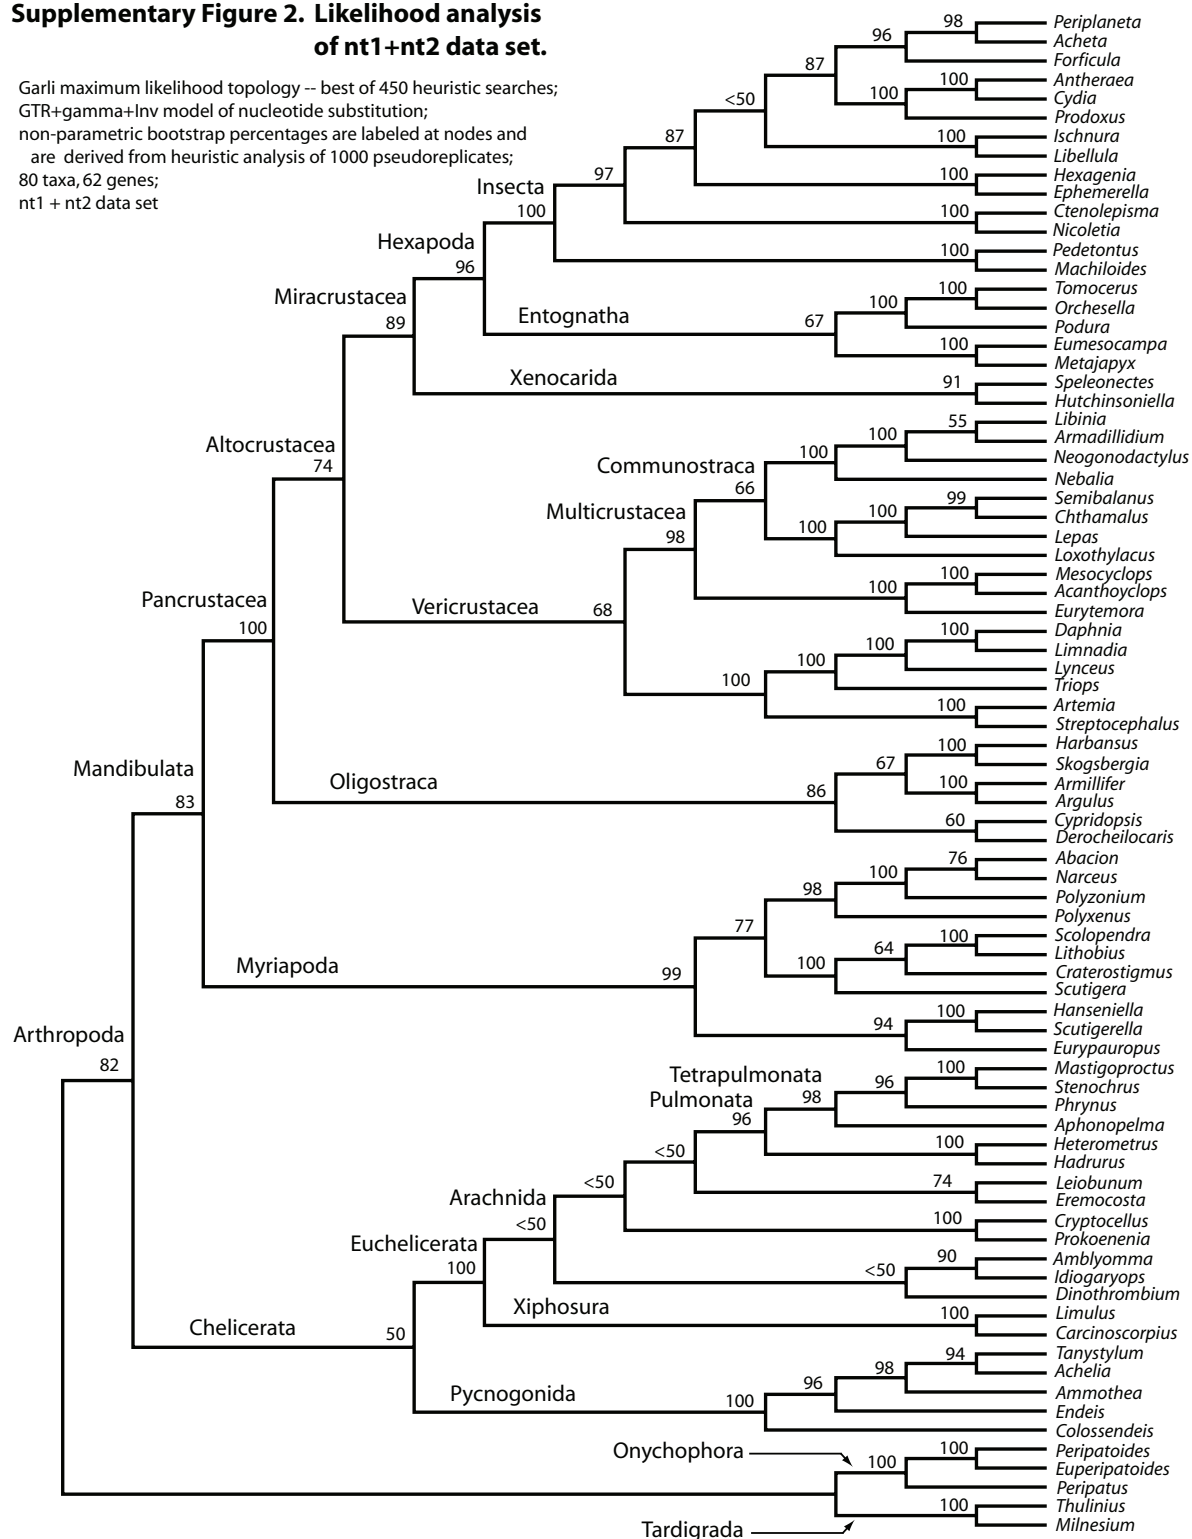

**Commentary on Supplementary Figure 2:** For comparison, 34 out of 37 pancrustacean nodes and 67 out of the 77 total nodes found in Figure 1 of the main text are also present in this figure, including all six higher-level pancrustacean clades of note, namely, Altocrustacea, Vericrustacea, Multicrustacea, Communostraca, Xenocarida and Miracrustacea. For these six nodes, bootstrap values are modest to strong but are consistently somewhat lower than for the degen1 data set shown in Figure 1. Note also that node support for Mandibulata, for Symphyla (represented by *Hanseniella* and *Scutigera*) + Pauropoda (represented by *Euryrauopus*) and for Pulmonata remains high (93%, 94% and 96%, respectively).

**Supplementary Figure 3. Bayesian analysis of degen1 data set.**

MrBayes consensus of 2 pooled runs, 4 chains/run,  
3,408,000 generations/run, 1 tree/1000 generations,  
3442 trees retained with std dev of split freq < 0.01;  
GTR+gamma+Inv model of nucleotide substitution;  
posterior probabilities are labeled at nodes;  
80 taxa, 62 genes;  
degen1 data set

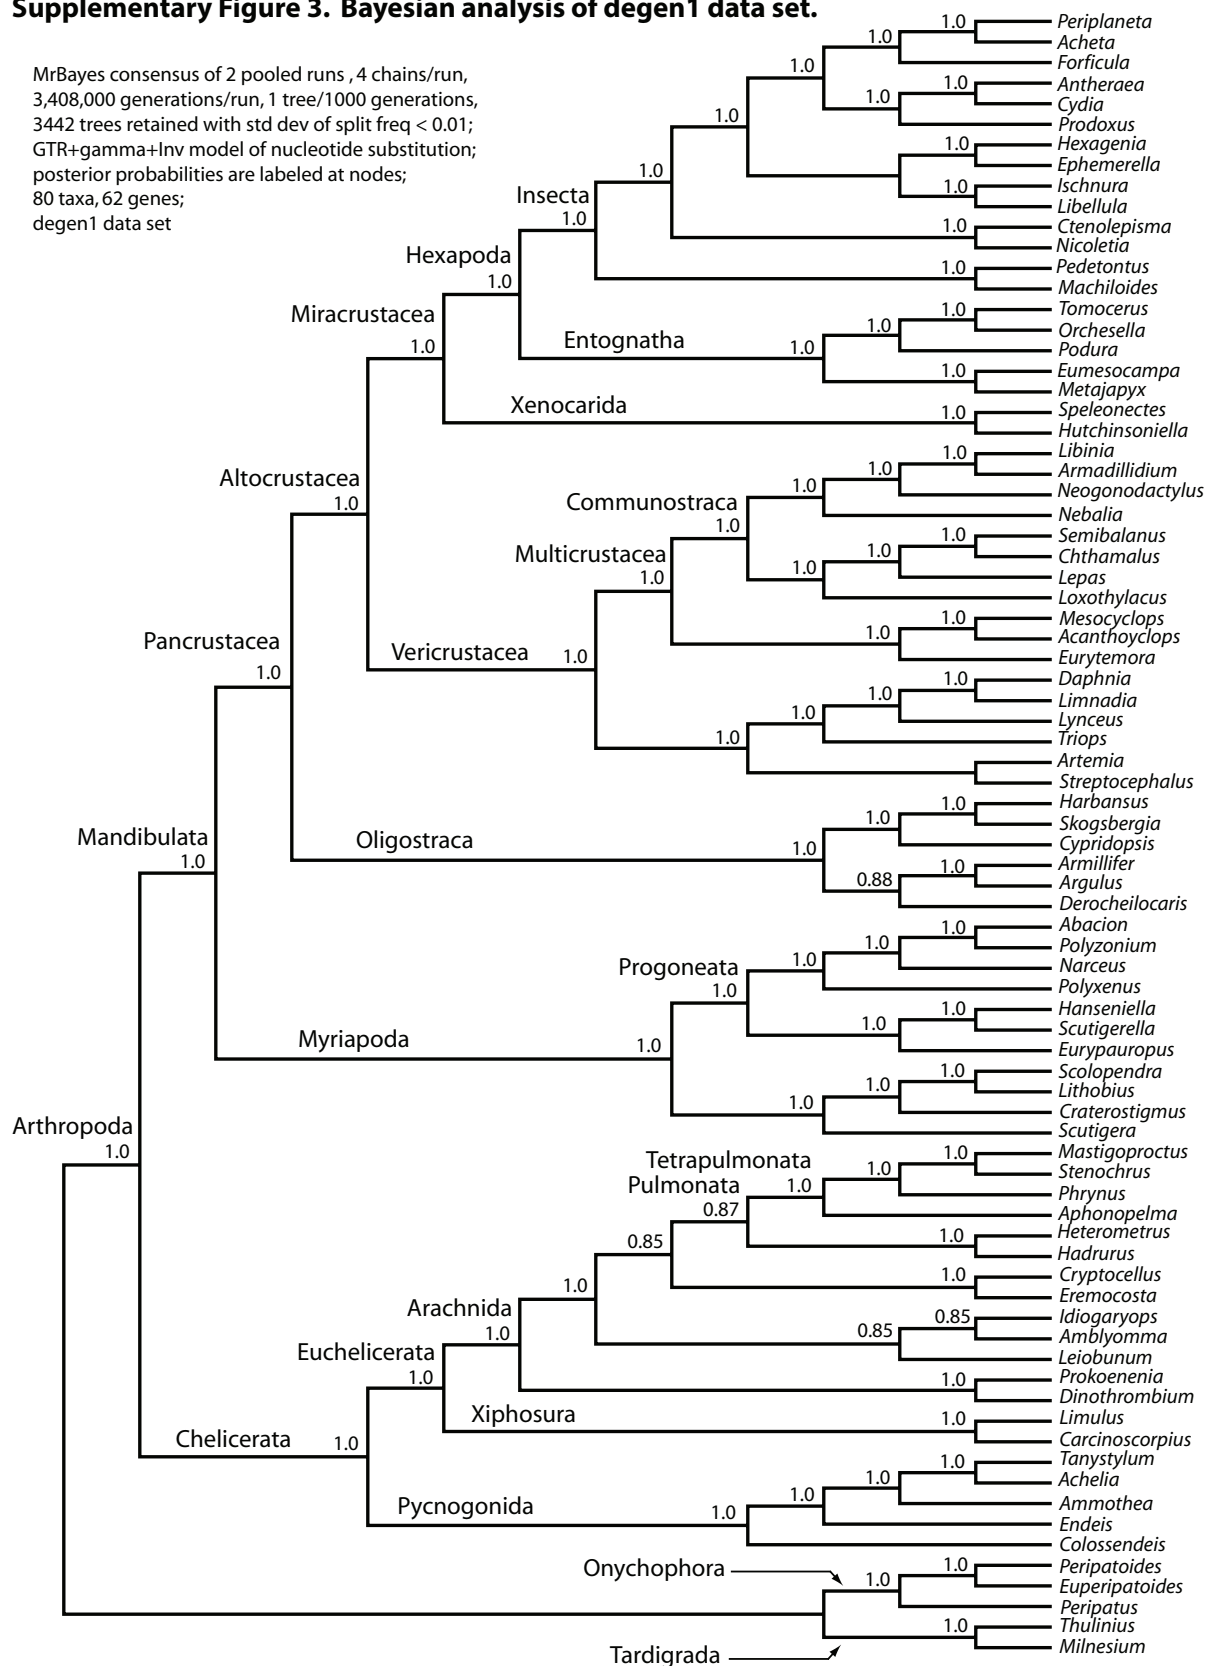

**Commentary on Supplementary Figure 3:** For comparison, the topology in this figure is identical to that in Figure 1 of the main text. Only one node in Pancrustacea and four nodes within Arachnida have posterior probabilities that are less than 1.0.

### Supplementary Figure 4. Bayesian analysis of unpartitioned nt1+nt2 data set.

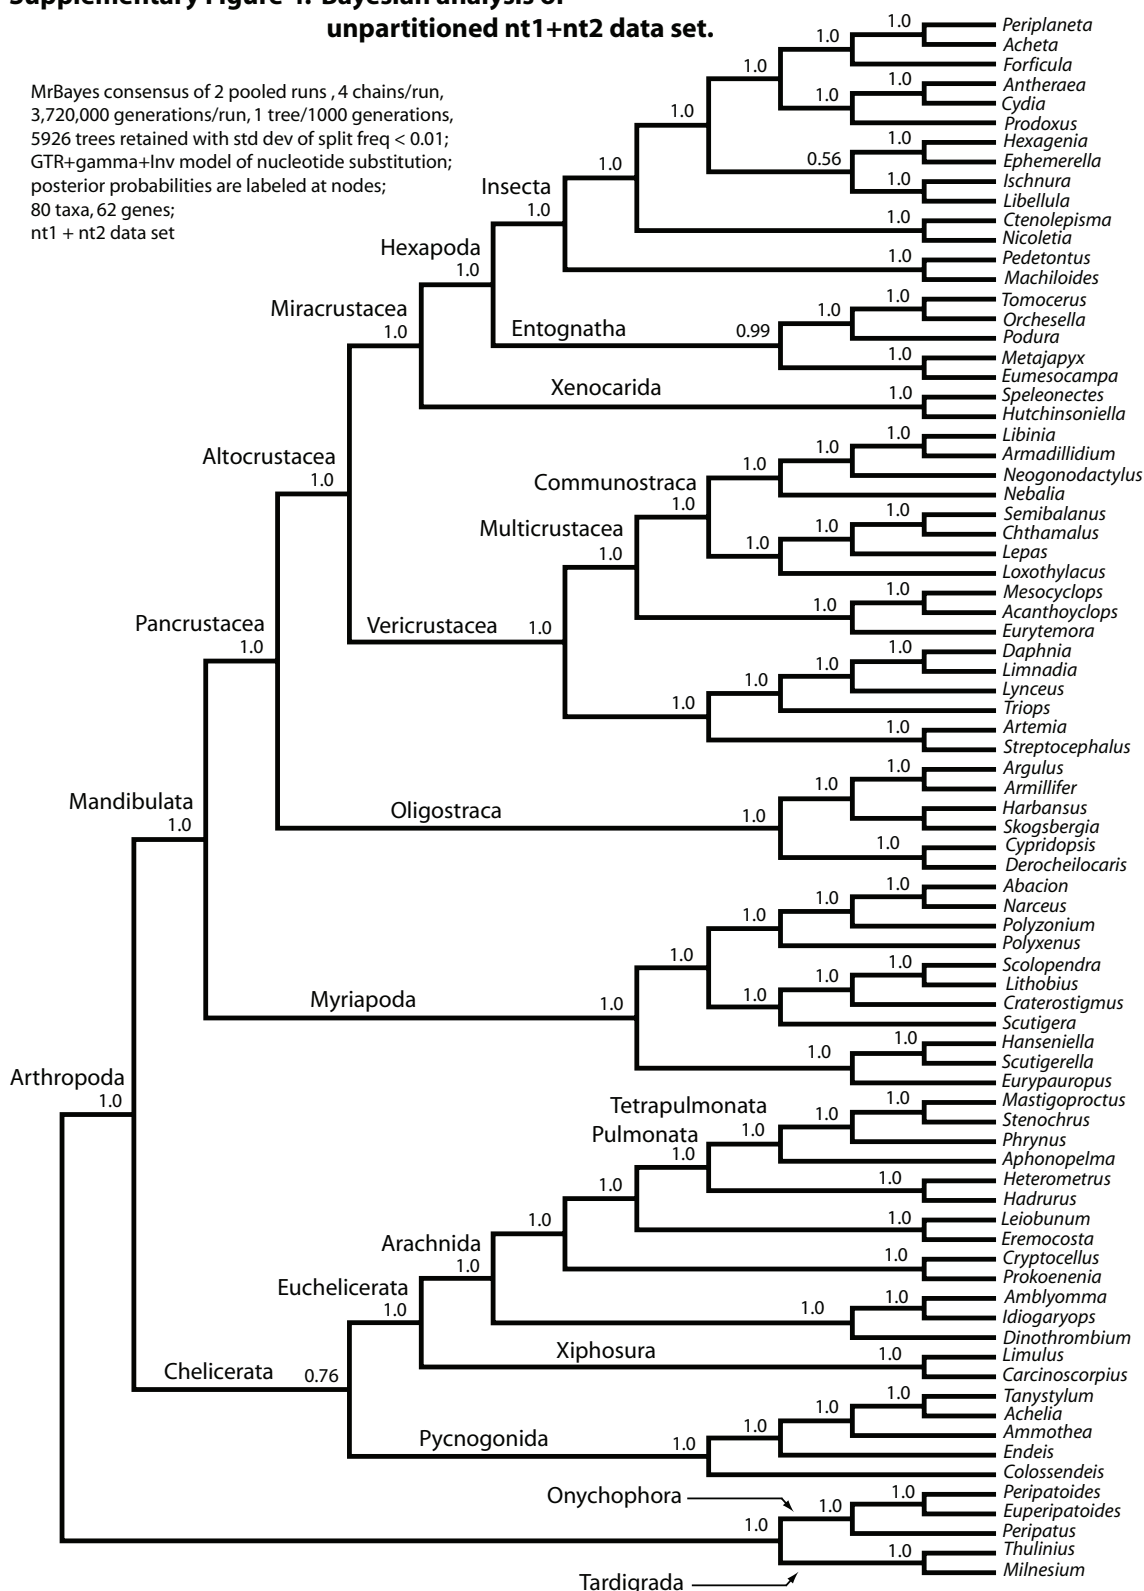

**Commentary on Supplementary Figure 4:** For comparison, 35 out of 37 pancrustacean nodes and 68 out of the 77 total nodes found in Figure 1 of the main text are also present in this figure, including all six higher-level pancrustacean clades of note, namely, Altocrustacea, Vericrustacea, Multicrustacea, Communostraca, Xenocarida and Miracrustacea. Only two nodes in Pancrustacea and one node in Chelicerata have posterior probabilities that are less than 1.0.

### Supplementary Figure 5. Bayesian analysis of partitioned nt1+nt2 data set.

MrBayes consensus of 2 pooled runs, 4 chains/run, 2,765,000 generations/run, 1 tree/1000 generations, 3742 trees retained with std dev of split freq < 0.01; GTR+gamma+Inv model of nucleotide substitution separately for both partitions; posterior probabilities are labeled at nodes; 80 taxa, 62 genes; partitioned nt12 data set (noLRall1+nt2 / LRall1)

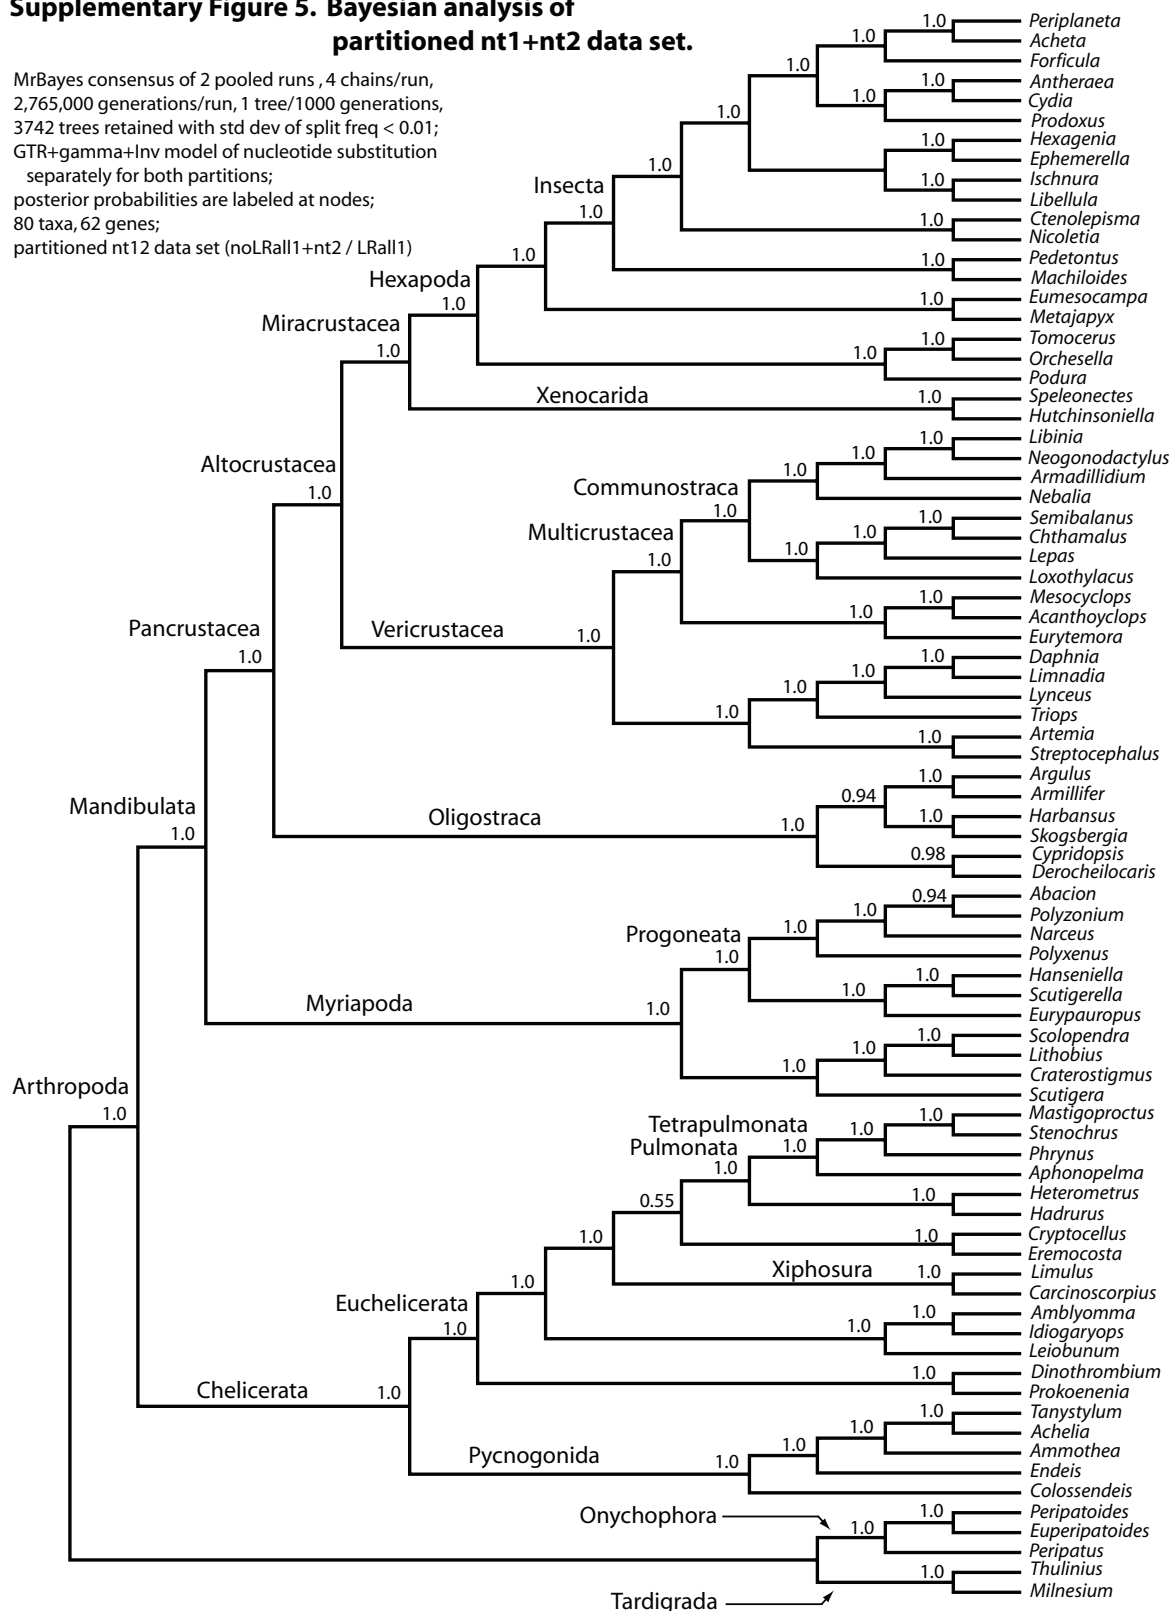

**Commentary on Supplementary Figure 5:** For comparison, 33 out of 37 pancrustacean nodes and 71 out of the 77 total nodes found in Figure 1 of the main text are also present in this figure, including all six higher-level pancrustacean clades of note, namely, Altocrustacea, Vericrustacea, Multicrustacea, Communostraca, Xenocarida and Miracrustacea. Only two nodes in Pancrustacea and one each in Myriapoda and Euchelicerata have posterior probabilities that are less than 1.0.

## Supplementary Figure 6. Parsimony analysis of degen1 data set.

PAUP\* maximum parsimony topology --  
 1 of 2 MP trees found in 1000 heuristic search reps;  
 The other MP tree places Xenocarida  
 one node closer to the root;  
 Non-parametric bootstrap percentages  
 are labeled at nodes and are derived from  
 heuristic analysis of 551 pseudoreplicates,  
 5 search reps/pseudorep, TBR branch  
 swapping;  
 80 taxa, 62 genes;  
 degen1 data set

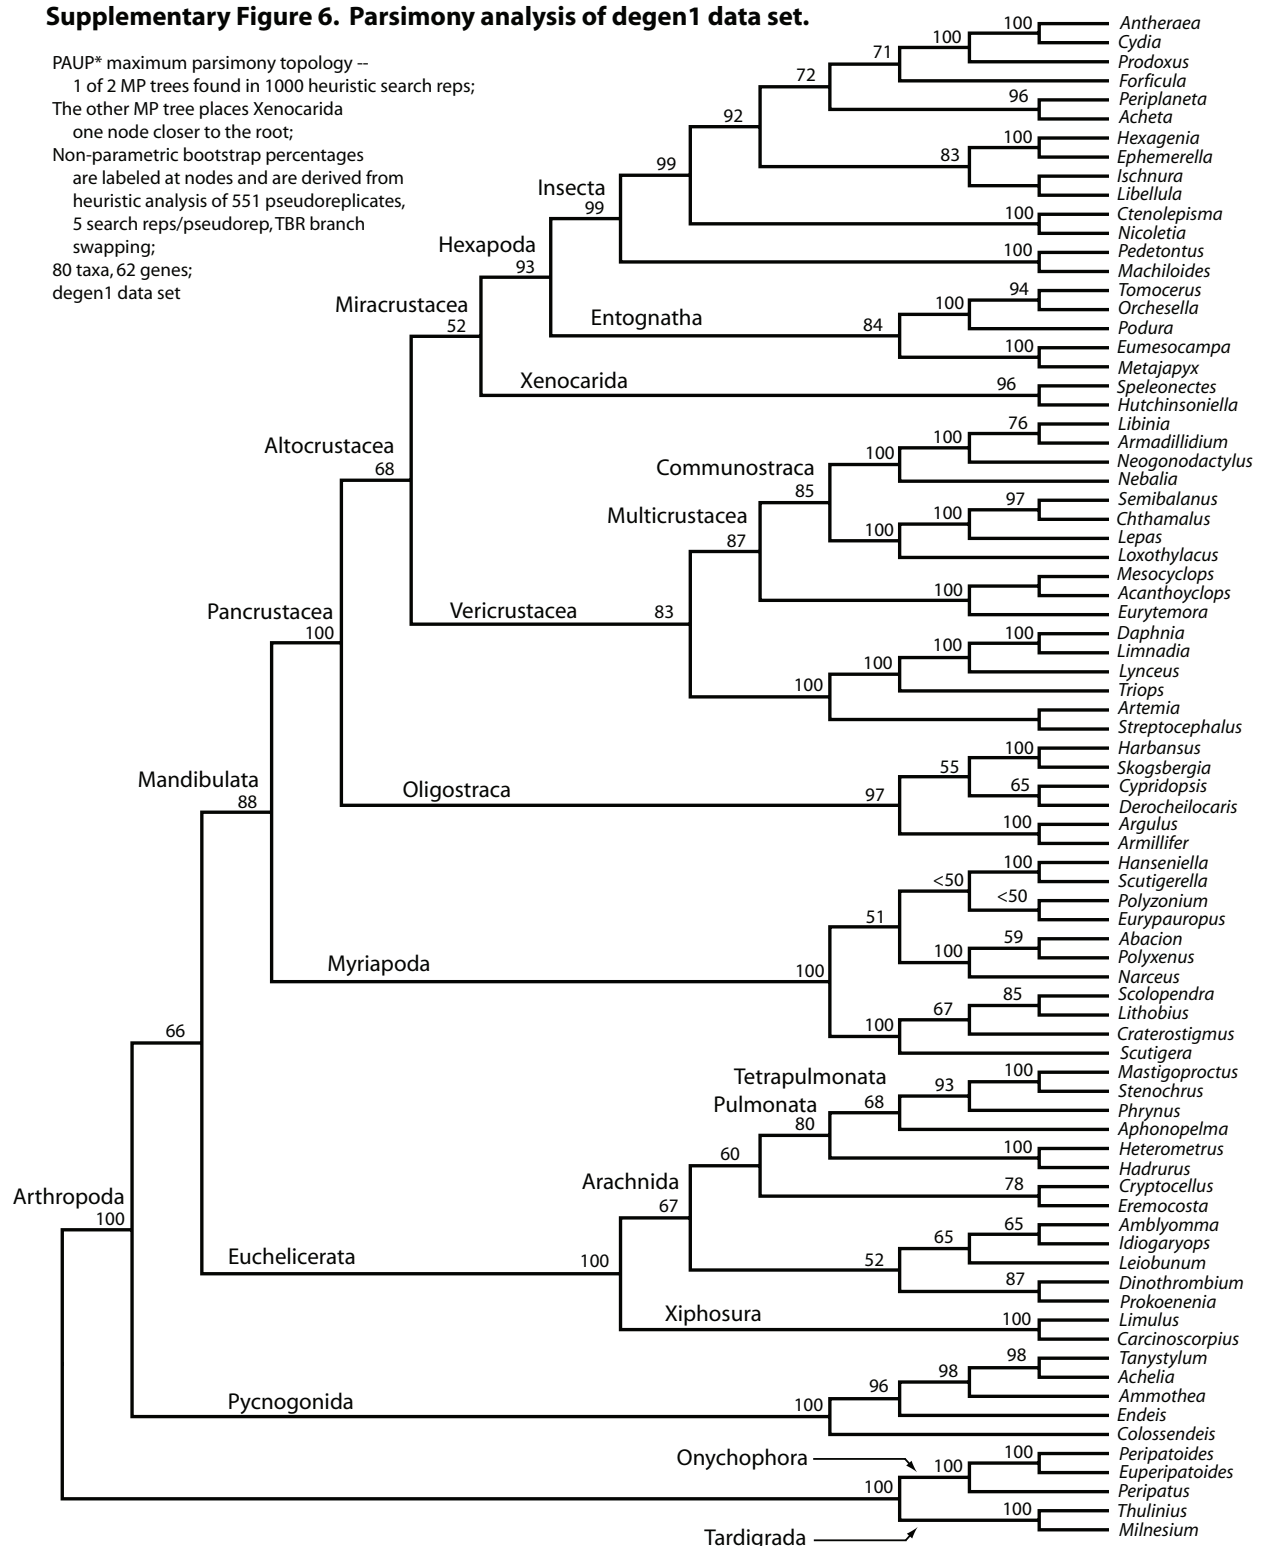

**Commentary on Supplementary Figure 6:** For comparison, 35 out of 37 pancrustacean nodes and 72 out of the 77 total nodes found in Figure 1 of the main text are also present in this figure, including all six higher-level pancrustacean clades of note, namely, Altocrustacea, Vericrustacea, Multicrustacea, Communostraca, Xenocarida and Miracrustacea. Of the six nodes, Altocrustacea and Miracrustacea show the greatest difference in bootstrap values between likelihood and parsimony analyses (93% vs. 68% and 94% vs. 52%, respectively; cf. Fig. 1 of the main text and this figure).

### Supplementary Figure 7. Likelihood analysis of amino acid data with increased outgroup sampling (85 taxa total).

#### CONDITIONS OF 85 TAXON ANALYSIS:

Garli maximum likelihood topology -- best of 215 search replicates;  
 JTT model of amino acid substitution, rate heterogeneity follows gamma distribution, 4 numerical rate categories, invariant sites estimated;  
 non-parametric bootstrap percentages are labeled at nodes and are derived from heuristic analysis of 580 pseudoreplicates;  
 85 taxa, 62 genes;  
 nucleotides translated to amino acids in Garli

(Bootstrap percentages for 80 taxa are taken directly from Figure 1.)

BP: 85 taxa  
 BP: 80 taxa

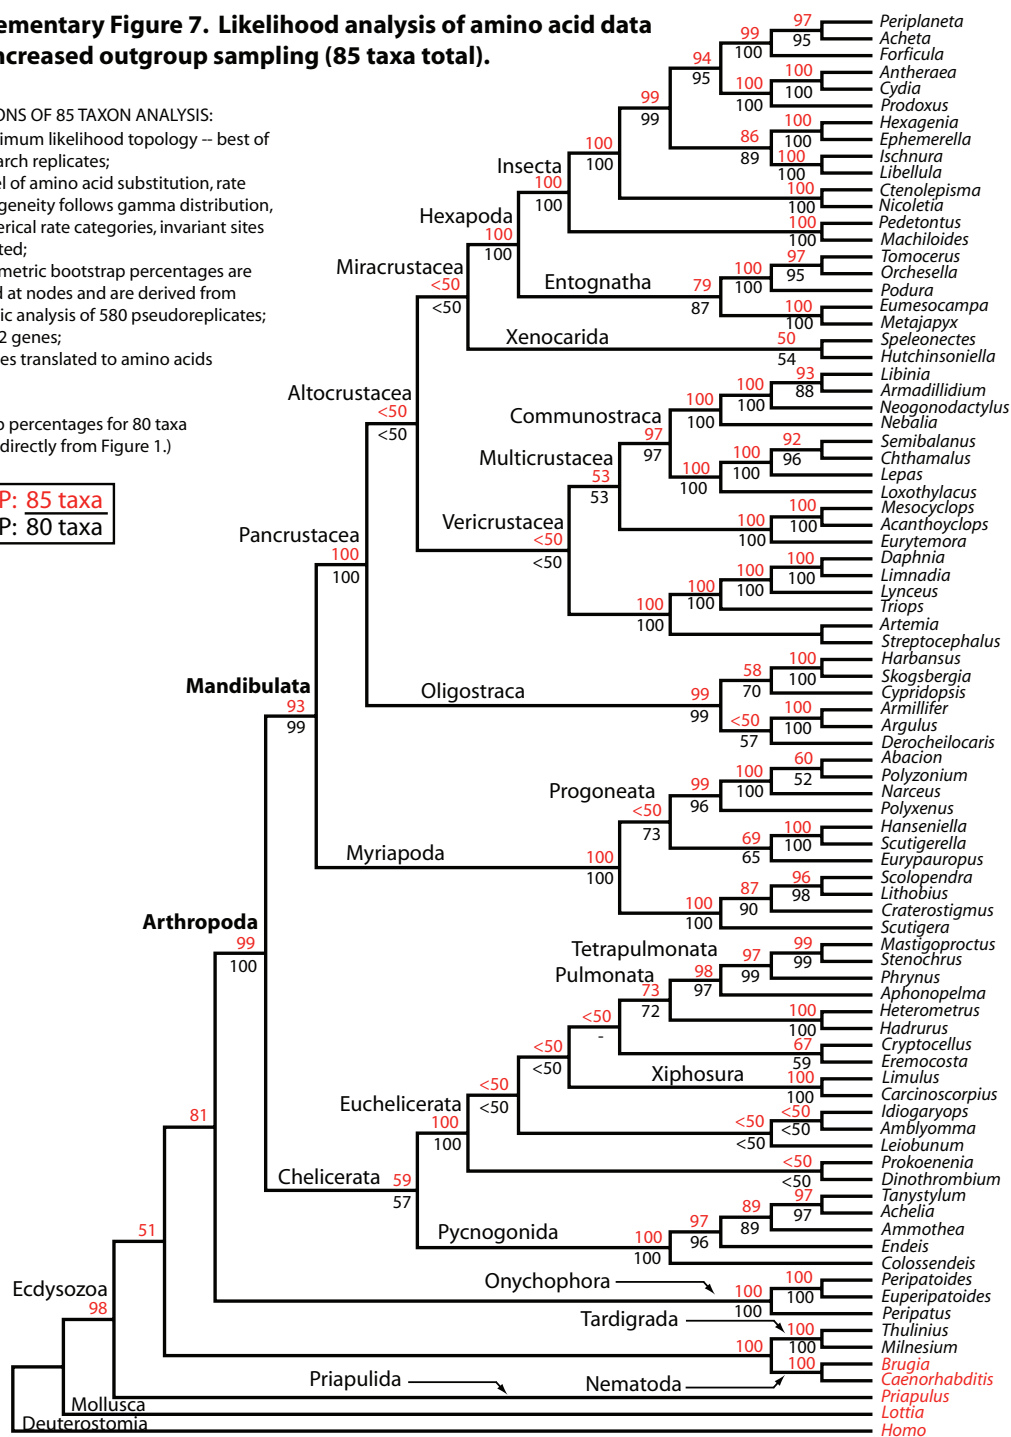

**Commentary on Supplementary Figure 7:** In this likelihood analysis of amino acids, the outgroup shown in Figure 1 of the main text (namely, 3 spp. Onychophora and 2 spp. Tardigrada) was supplemented with two Nematoda, one Priapulida, one Mollusca and one Deuterostomia species to test whether an expansion of the outgroup would dramatically affect node support values within Arthropoda, particularly for the more inclusive groups such as Mandibulata. It did not. Indeed, the expanded outgroup resulted in no topological changes within Arthropoda relative to the 80-taxon analysis except for one weakly supported node (BP <50%) within Euchelicerata (see "-"). Bootstrap values for the 85-taxon analysis are in red (above branches); those for the 80-taxon analysis are in black (below branches, see also Fig. 1 of the main text). Both sets of values are mapped onto the ML topology for 85 taxa. Details of supplementary sequence acquisition, including their database accession numbers, are in Supplementary Table 5.

**Supplementary Table 1.** Exemplar species used in this study, showing distribution across higher taxa and laboratory codename.

## ARTHROPODA

Pancrustacea: Hexapoda

Entognatha

Collembola

Poduridae: *Podura aquatica* (Paq)Entomobryidae: *Orchesella imitari* (Oim)Tomoceridae: *Tomocerus* sp. (Tom)

Diplura

Japygidae: *Metajapyx subterraneus* (Msu & Jap)Campodeidae: *Eumesocampa frigilis* (Efr)

Insecta

Archaeognatha

*Pedetontus saltator* (Psa)*Machiloides banksi* (Mba)

Zygentoma

*Ctenolepisma lineata* (Cli)*Nicoletia meinerti* (Nme)

Pterygota: Paleoptera: Ephemeroptera

*Hexagenia limbata* (May)*Ephemerella inconstans* (Ein)

Pterygota: Paleoptera: Odonata

*Ischnura verticalis* (Ive)*Libellula lydia* (Lly)

Pyterygota: Neoptera: Polyneoptera

Dermaptera: *Forficula auricularia* (Fau)Blattodea: *Periplaneta americana* (Pam)Orthoptera: *Acheta domesticus* (Ado)

Pterygota: Neoptera: Lepidoptera

*Antheraea paukstadtorum* (Apauk)*Cydia pomonella* (Cpo)*Prodoxus quinquepunctella* (Pqu)

Pancrustacea: former "Crustacea"

Xenocarida: Remipedia

*Speleonectes tulumensis* (Stu)

Xenocarida: Cephalocarida

*Hutchinsoniella macracantha* (Hma)

Vericrustacea: Malacostraca

Phyllopoda: *Nebalia hessleri* (Nhe)Hoplocarida: *Neogonodactylus oerstedii* (Neo)Peracarida: *Armadillidium vulgare* (Avu)Eucarida: *Libinia emarginata* (Lem)

Vericrustacea: Thecostraca ("Maxillopoda")

Sessilia: *Semibalanus balanoides* (Bba)Sessilia: *Chthamalus fragilis* (Cfr)Pedunculata: *Lepas anserifera* (Lean)Rhizocephala: *Loxothylacus texanus* (Lox)

Vericrustacea: Copepoda ("Maxillopoda")

Cyclopoida: *Mesocyclops edax* (Meso)Cyclopoida: *Acanthocyclops vernalis* (A369)



- Calanoida: *Eurytemora affinis* (Eaf)
- Vericrustacea: Branchiopoda
  - Notostraca: *Triops longicaudatus* (Tlo)
  - Anostraca: *Artemia salina* (Asa3)
  - Anostraca: *Streptocephalus seali* (ufs)
  - Cladocera: *Daphnia magna* (Dma)
  - Spinicaudata: *Limnadia lenticularis* (Lle)
  - Laevicaudata: *Lynceus* sp. (Lyn)
- Oligostraca
  - Ostracoda
    - Podocopa: *Cypridopsis vidua* (Ost)
    - Myodocopa: *Harbansus paucichelatus* (Hapa)
    - Myodocopa: *Skogsbergia lernerii* (Skle)
  - Branchiura: *Argulus* sp. (Arg2)
  - Pentastomida: *Armillifer armillatus* (Aar)
  - Mystacocarida: *Derocheilocaris typicus* (Dty)
- Myriapoda
  - Chilopoda
    - Lithobiomorpha: *Lithobius forficatus* (Lfo)
    - Scutigermorpha: *Scutigera coleoptrata* (Scol)
    - Scolopendromorpha: *Scolopendra polymorpha* (Spo)
    - Craterostigmomorpha: *Craterostigmus tasmanianus* (Ctas)
  - Diplopoda
    - Spirobolida: *Narceus americanus* (Nam)
    - Callipodida: *Abacion magnum* (Ama)
    - Polyzoniida: *Polyzonium germanicum* (Pge2)
    - Polyxenida: *Polyxenus fasciculatus* (Pol2)
  - Symphyla
    - Hanseniella* sp. (Han & Han2)
    - Scutigera* sp. (Scu3)
  - Pauropoda
    - Eurypauropus spinosus* (Eury)
- Euchelicerata
  - Arachnida
    - Thelyphonida: *Mastigoproctus giganteus* (Mga)
    - Scorpiones: *Hadrurus arizonensis* (Hari)
    - Scorpiones: *Heterometrus spinifer* (Hsp)
    - Araneae: *Aphonopelma chalcodes* (Ach)
    - Acari: Parasitiformes: *Amblyomma* sp. (Amb2)
    - Ricinulei: *Cryptocellus centralis* (Crp)
    - Acari: Acariformes: *Dinotrombium pandorae* (Din)
    - Amblypygi: *Phrynus marginemaculatus* (Pma)
    - Schizomida: *Stenochrus portoricensis* (Stp)
    - Solifugae: *Eremocosta gigasella* (Egig)
    - Pseudoscorpiones: *Idiogaryops pumilis* (Ipum)
    - Opiliones: *Leiobunum nigripes* (Lnig) [N.B.: recently established as junior synonym of *L. verrucosum*]
    - Palpigrada: *Prokoenenia wheeleri* (Pwh)
  - Xiphosura
    - Limulus polyphemus* (Lpo)
    - Carcinoscorpius rotundicauda* (Cro)

## Pycnogonida

*Tanystylum orbiculare* (Tor)

*Achelia echinata* (Aeli)

*Colossendeis* sp. (Col)

*Endeis laevis* (Ele)

*Ammothea hilgendorfi* (Ahi)

## ONYCHOPHORA

Peripatopsidae: *Euperipatoides rowelli* (Erw & Ero)

Peripatopsidae: *Peripatoides novaezealandiae* (Pno2)

Peripatidae: *Peripatus* sp. (Pep & Per2)

## TARDIGRADA

Eutardigrada: Parachela: *Thulinus stephaniae* (Thul) [N.B.: The genus name has recently been changed from *Thulinia* to *Thulinus*.]

Eutardigrada: Apochela: *Milnesium tardigradum* (Mta & Mtd & Hyp)

**Supplementary Table 2.** Chi-Square Test results for combined- and single-gene-region data, using PAUP\*4.0b10 (ref. 36), and sequences missing for particular taxa. The unalignable portion of the data matrix was removed prior to running these tests.

data set                      P value (68 gene regions)

|              |          |
|--------------|----------|
| nt123        | < 0.0001 |
| nt12         | < 0.0001 |
| nt1          | < 0.0001 |
| nt2          | 0.5085   |
| nt3          | < 0.0001 |
| noLRall1     | 0.9870   |
| LRall1       | < 0.0001 |
| noLRall1+nt2 | 0.1450   |

P value (single gene regions)

|                                | <u>nt12</u> | <u>noLRall1+nt2</u> | <u>Sequences missing</u>                                                                                 |
|--------------------------------|-------------|---------------------|----------------------------------------------------------------------------------------------------------|
| charset 109fin1_2 = 1-711;     | > 0.9999    | > 0.9999            | Meso Nhe A369 Bba Cfr Dma Hma Lyn Skle Efr<br>Lly Nme Ahi Ipum                                           |
| charset 113fin1_2 = 718-1722;  | > 0.9999    | > 0.9999            | Asa3 Bba Hma May Tom2 Hapa Pol2 Pno2 Ahi<br>Amb2 Egig                                                    |
| charset 127fin1_2 = 1729-2196; | > 0.9999    | > 0.9999            | Meso Cpo A369 Cfr Eaf Hma Lean Lem Spo Aar<br>Hapa Skle Pno2 Ctas2 Din2 Dty Ipum Pwh Stp                 |
| charset 149fin2_3 = 2203-3195; | > 0.9999    | > 0.9999            | Thul Apauk Cpo Pqu Hma Jap Scol Hapa Ein<br>Pge2 Pno2 Erw Mtd Pep                                        |
| charset 166fin2_3 = 3202-3546; | > 0.9999    | > 0.9999            | Psa                                                                                                      |
| charset 192fin1_2 = 3553-3975; | > 0.9999    | > 0.9999            | Paq Stu Thul A369 Hma Lean Oim Aar Ado Ive<br>Lly Ama Pno2 Avu3 Col2 Mtd                                 |
| charset 197fin1_2 = 3982-4434; | > 0.9999    | > 0.9999            | Meso Stu Thul Asa3 Cfr Pam Tom2 ufs Hapa Lox<br>Skle Ama Pno2 Dty Ele Ipum Mtd Pwh                       |
| charset 220fin1_2 = 4441-4992; | > 0.9999    | > 0.9999            | Mga Paq Thul A369 Cli Eaf Hma Jap Aar Hapa<br>Lox Lyn Skle Pno2 Cro2 Ipum Mtd                            |
| charset 226fin1_2 = 4999-5673; | > 0.9999    | > 0.9999            | Fau Meso Pqu Cfr Hma Hap Ado Pno2                                                                        |
| charset 247fin1_2 = 5680-6174; | > 0.9999    | > 0.9999            | Lfo Nhe Pqu Arg2 Bba Lem Aar Hapa Lyn Skle<br>Mba Pge2 Pno2 Amb2 Col2 Cro2 Crp2 Dty Egig<br>Lle2 Mtd Stp |
| charset 25fin2_4 = 6181-6486;  | > 0.9999    | > 0.9999            | Nhe Cfr Hma Lean Neo Aar Ach Hapa Skle Avu3                                                              |

|                                   |          |          |                                                                                                                                                       |
|-----------------------------------|----------|----------|-------------------------------------------------------------------------------------------------------------------------------------------------------|
| charset 262fin1_2 = 6493-7089;    | > 0.9999 | > 0.9999 | Paq Thul Bba May Hapa Efr Amb2 Ctas2 Mtd                                                                                                              |
| charset 265fin2_3 = 7096-7572;    | > 0.9999 | > 0.9999 | Cfr Scol Spo ufs Aar Ach Hapa Ado Amb2 Col2<br>Cro2 Dty Ele Ipum Lle2                                                                                 |
| charset 267fin2_3 = 7579-8187;    | > 0.9999 | > 0.9999 | Stu Hari Aar Hapa Lly Dty                                                                                                                             |
| charset 268fin1_2 = 8194-8988;    | > 0.9999 | > 0.9999 | Nhe Thul Tor Asa3 Bba Cfr Cli Hari Hma Hsp<br>Lean Lem Jap Neo Spo Aar Ach Hapa Efr Pno2<br>Avu3 Dty Ele Eury Mtd Pma2                                |
| charset 26fin3_4 = 8995-9726;     | > 0.9999 | > 0.9999 | Fau Mga Nhe Stu Apauk Cpo Pqu Cfr Hma Jap<br>Neo Oim Psa Efr Mtd                                                                                      |
| charset 270fin2_3 = 9733-10206;   | > 0.9999 | > 0.9999 | Nhe Thul A369 Arg2 Asa3 Hma ufs Aar Efr Ein<br>Ama Pge2 Pol2 Scu3 Pno2 Aeli Ahi Eury Ipum<br>Lle2 Mtd Pep Pwh                                         |
| charset 274fin1_2 = 10213-10752;  | > 0.9999 | > 0.9999 | Lpo Nhe Paq Stu Thul Tor Cli Eaf Hari Jap<br>Neo Oim Psa Tom2 Hapa Lnig Efr Mba Nme Pno2<br>Aeli Ahi Avu3 Col2 Cro2 Egig Ele Erw Ipum<br>Mtd Pma2 Stp |
| charset 2fin3_4 = 10759-11292;    | > 0.9999 | > 0.9999 | May                                                                                                                                                   |
| charset 2fin7_8 = 11299-11919;    | > 0.9999 | > 0.9999 | Paq A369 Cfr Dma Hma Lean Jap Oim Tom2 Hapa<br>Pge2 Aeli Col2 Cro2 Dty Egig Ele Lle2 Mtd<br>Pwh Stp Fau                                               |
| charset 3006fin1_2 = 11926-12147; | > 0.9999 | > 0.9999 | Asa3 Dma Lyn Cro2 Din2 Dty Egig Ipum Lle2<br>Mtd Pma2 Pwh Stp                                                                                         |
| charset 3007fin1_2 = 12154-12783; | 0.9855   | > 0.9999 | Mga Thul Tor Asa3 Cli Hari Hma Lean Aar Skle<br>Ein Pol2 Pno2 Aeli Col2 Cro2 Ele Mtd Stp                                                              |
| charset 3009fin2_3 = 12790-13161; | > 0.9999 | > 0.9999 | Bba Cfr Lean Pam Hapa Lox Lly Ama Pol2 Pno2<br>Amb2 Cro2 Eury Lle2                                                                                    |
| charset 3012fin1_2 = 13168-13692; | > 0.9999 | > 0.9999 | Nam Pqu Lean May Pam Aar Ach Lnig Ive Lly<br>Pge2 Pno2 Crp2 Dty Egig                                                                                  |
| charset 3017fin1_2 = 13699-14307; | > 0.9999 | > 0.9999 | Meso Bba Cfr Cli Hma Lean Oim Aar Hapa Lyn<br>Han2 Pno2 Ahi Amb2 Col2 Din2 Lle2 Mtd                                                                   |
| charset 3031fin2_3 = 14314-14916; | > 0.9999 | > 0.9999 | Fau Stu Tlo Apauk A369 Eaf Hma May Ach Hapa<br>Skle Ado Ein Pol2 Pno2 Aeli Cro2 Erw Mtd Pep<br>Pwh                                                    |
| charset 3031fin4_5 = 14923-15348; | > 0.9999 | > 0.9999 | A369 Arg2 Hma Lem May ufs Skle Ein Nme Pge2<br>Cro2 Mtd Pwh                                                                                           |
| charset 3044fin1_2 = 15355-15678; | > 0.9999 | > 0.9999 | A369 Bba Hari Hsp Lean Pam Hapa Aeli Dty<br>Egig Eury Pma2                                                                                            |

|                                   |          |          |                                                                                                                    |
|-----------------------------------|----------|----------|--------------------------------------------------------------------------------------------------------------------|
| charset 3055fin2_3 = 15685-15930; | > 0.9999 | > 0.9999 | Ost Tor Asa3 Spo ufs Aar Hapa Lox Lly Mba<br>Pge2 Pol2 Dty Egig Ipum Lle2                                          |
| charset 3059fin1_3 = 15937-16686; | > 0.9999 | > 0.9999 | May Hapa Lox Lyn Mba Han2 Pge2 Pol2 Scu3<br>Pno2 Cro2 Ele                                                          |
| charset 3064fin6_7 = 16693-17298; | > 0.9999 | > 0.9999 | Apauk Cpo Lem Mba Cro2 Dty                                                                                         |
| charset 3066fin1_3 = 17305-18051; | > 0.9999 | > 0.9999 | Meso Paq Thul Apauk Asa3 Bba Cfr Dma Hma<br>Lean Jap ufs Hapa Lox Mba Han2 Scu3 Pno2<br>Aeli Ahi Din2 Dty Ele Eury |
| charset 3070fin4_5 = 18058-18777; | > 0.9999 | > 0.9999 | Meso Nhe Ost Tor Bba Hma Lean Jap Hapa Efr<br>Ein Mba Nme Pno2 Aeli Ahi Amb2 Col2 Ctas2<br>Dty Ele Pol2            |
| charset 3089fin2_3 = 18784-19092; | > 0.9999 | > 0.9999 | Dma Pam Lox Mba Pol2                                                                                               |
| charset 3094fin2_3 = 19099-19497; | > 0.9999 | > 0.9999 | Fau Nhe Tlo Apauk Cpo A369 May Tom2 Aar Ein<br>Mba Pno2 Avu3                                                       |
| charset 3114fin1_2 = 19504-19881; | > 0.9999 | > 0.9999 | Lpo Nhe Apauk Dma Hari Hma Hsp Oim Aar Ach<br>Hapa Lyn Skle Mba Ama Pol2 Amb2 Col2 Cro2<br>Dty Mtd Pep Pma2 Stp    |
| charset 3121fin2_3 = 19888-20343; | > 0.9999 | > 0.9999 | Lpo Paq Tlo Cpo Bba Cfr Eaf Hsp Lean Oim<br>Tom2 Hapa Lox Mba Nme Ama Pol2 Col2 Cro2 Dty                           |
| charset 3136fin1_2 = 20350-21201; | > 0.9999 | > 0.9999 | Hapa Scu3 Pno2 Dty                                                                                                 |
| charset 3152fin1_2 = 21208-21486; | > 0.9999 | > 0.9999 | Tor Cfr Cli Lem Hapa Lox Mba Aeli Ahi Dty<br>Ele Eury Pwh Stp                                                      |
| charset 3153fin1_2 = 21493-22059; | > 0.9999 | > 0.9999 | Hma Jap Lnig Efr Crp2 Dty Mtd Pwh                                                                                  |
| charset 3196fin1_3 = 22066-22608; | > 0.9999 | > 0.9999 | Lean Hapa Cro2 Egig Erw Pep                                                                                        |
| charset 3196fin5_6 = 22615-23334; | > 0.9999 | > 0.9999 | A369 Hapa Erw Mtd                                                                                                  |
| charset 3202fin1_3 = 23341-23859; | > 0.9999 | > 0.9999 | Ost A369 Asa3 Cfr Hari Hsp Neo ufs Hapa Din2<br>Egig Ele Ipum                                                      |
| charset 36fin1_2 = 23866-24363;   | > 0.9999 | > 0.9999 | Ost Thul A369 Arg2 Cfr Hma Hsp Oim Aar Ach<br>Hapa Efr Crp2 Dty Egig Ele Mtd                                       |
| charset 40fin2_3 = 24370-25131;   | > 0.9999 | > 0.9999 | Cfr Tom2 Hapa Aeli Dty Ele                                                                                         |
| charset 42fin1_2 = 25138-25986;   | > 0.9999 | > 0.9999 | Hma Hapa Lnig Efr Pno2 Eury Ipum Mtd                                                                               |
| charset 44fin2_3 = 25993-26520;   | > 0.9999 | > 0.9999 | A369 Arg2 Hma Lean Oim Psa Aar Efr Pno2 Dty<br>Egig Ele Erw Eury                                                   |
| charset 58fin3_6 = 26527-27462;   | > 0.9999 | > 0.9999 | A369 Arg2 Asa3 Cfr Hma Jap Oim Pno2 Cro2                                                                           |

|                                   |          |          |                                                                                                                                                      |
|-----------------------------------|----------|----------|------------------------------------------------------------------------------------------------------------------------------------------------------|
|                                   |          |          | Ipum Pep                                                                                                                                             |
| charset 58fin7_9 = 27469-27807;   | > 0.9999 | > 0.9999 | Lpo Thul Tor Asa3 Hari Hsp Aar Hapa Lyn Efr<br>Cro2 Egig Ipum Mtd Pma2                                                                               |
| charset 62fin2_3 = 27814-28647;   | > 0.9999 | > 0.9999 | Lpo Mga Bba Cfr Hari Hma Hsp Lean Jap Hapa<br>Lox Ado Efr Scu3 Pno2 Pma2 Stp                                                                         |
| charset 63fin2_3 = 28654-29178;   | > 0.9999 | > 0.9999 | Hari Hsp Skle Efr Amb2                                                                                                                               |
| charset 69fin2_3 = 29185-29856;   | > 0.9999 | > 0.9999 | Dma Hma Hapa Lyn Efr Mba Ipum Pwh                                                                                                                    |
| charset 6fin2_3 = 29863-30204;    | > 0.9999 | > 0.9999 | Mga Nam Stu Apauk A369 Asa3 Cli Eaf Hma Lean<br>May Jap Spo Hapa Lyn Skle Ado Ive Lly Nme<br>Pge2 Pno2 Aeli Din2 Egig Ele Lle2 Pwh Stp               |
| charset 73fin2_3 = 30211-31089;   | > 0.9999 | > 0.9999 | Paq Apauk Hma Lean Jap Oim Hapa Lox Efr Pno2<br>Dty Lle2 Mtd                                                                                         |
| charset 8018fin1_2 = 31096-31398; | > 0.9999 | > 0.9999 | Meso Ost Paq Stu Thul Tlo A369 Bba Lem Neo<br>Aar Lox Ado Efr Mba Han2 Pge2 Pol2 Aeli Ahi<br>Avu3 Dty Ele Erw Eury Mtd                               |
| charset 8028fin1_2 = 31405-31728; | > 0.9999 | > 0.9999 | Fau Lpo Meso A369 Arg2 Asa3 Cli Dma Lean May<br>Neo Pam Tom2 ufs Aar Lnig Lyn Efr Ein Mba<br>Nme Pol2 Avu3 Cro2 Din2 Egig Eury Ipum                  |
| charset 8029fin6_7 = 31735-32277; | > 0.9999 | > 0.9999 | Lfo Lpo Ost Stu Apauk Cfr Lean Lyn Skle Cro2<br>Mtd                                                                                                  |
| charset 8053fin2_3 = 32284-32856; | > 0.9999 | > 0.9999 | Meso Thul A369 Arg2 Dma Eaf Hapa Mba Pge2<br>Ctas2 Lle2 Mtd Stp                                                                                      |
| charset 8070fin1_3 = 32863-33405; | > 0.9999 | > 0.9999 | Paq Thul Tor Arg2 Asa3 Neo Oim Tom2 ufs Skle<br>Han2 Pno2 Aeli Avu3 Col2 Dty Egig Ele Erw<br>Mtd Stp                                                 |
| charset 8091fin1_2 = 33412-34080; | > 0.9999 | > 0.9999 | Lfo Thul Arg2 Bba Cfr Cli Dma Hma Lean May<br>Oim Scol Spo Tom2 Hapa Skle Ado Efr Ama Scu3<br>Aeli Col2 Crp2 Ctas2 Dty Ele Erw Eury Ipum<br>Mtd Pma2 |
| charset 96fin1_3 = 34087-34548;   | > 0.9999 | > 0.9999 | Spo Skle Pol2 Aeli Cro2 Dty Ele Ipum Lle2                                                                                                            |
| charset acc2_4 = 34555-35085;     | > 0.9999 | > 0.9999 | May Jap Aar Ach Hapa Lnig Lox Lyn Skle Ado<br>Efr Ein Ive Lly Mba Nme Ama Han2 Pge2 Pol2<br>Scu3                                                     |

|                                   |          |          |                                                                                                                                                                                        |
|-----------------------------------|----------|----------|----------------------------------------------------------------------------------------------------------------------------------------------------------------------------------------|
| charset aspek11_12 = 35092-35694; | > 0.9999 | > 0.9999 | Tlo A369 Hsp Aar Ach Hapa Lnig Lox Lyn Skle<br>Ado Efr Ein Ive Lly Mba Nme Ama Han2 Pge2<br>Pol2 Scu3 Pno2 Erw Eury Ipum Pma2 Stp                                                      |
| charset aspek19_21 = 35701-36210; | > 0.9999 | > 0.9999 | Meso Mga Cpo Pqu A369 Hari Hsp Aar Ach Hapa<br>Lnig Lox Lyn Skle Ado Efr Ein Ive Lly Mba<br>Nme Ama Pge2 Pol2 Scu3 Cro2 Pma2 Stp                                                       |
| charset aspek2_6 = 36217-36513;   | > 0.9999 | > 0.9999 | Meso Thul Tlo Apauk Cpo Pqu A369 Asa3 Eaf<br>Aar Ach Hap Lnig Lox Lyn Skle Ado Efr Ein<br>Ive Lly Mba Nme Ama Han2 Pge2 Pol2 Scu3 Pno2<br>Din2 Dty Eury Ipum Lle2 Mtd Pep Pma2 Pwh Stp |
| charset efla = 36520-37611;       | > 0.9999 | > 0.9999 |                                                                                                                                                                                        |
| charset ef2 = 37618-39843;        | > 0.9999 | > 0.9999 | Apauk Cpo Pqu Ive Pno2                                                                                                                                                                 |
| charset polii = 39850-41976;      | > 0.9999 | > 0.9999 | Apauk Cpo Pqu Col2 Dty<br>Jap (partial sequence)<br>Pno2 (partial sequence)                                                                                                            |

**Supplementary Table 3.** Taxonomic groups recovered with  $\geq 70\%$  bootstrap support in single-gene-region, degen1-data-matrix, likelihood analyses, with **summary** below.\*

2fin3 4: Asa3 + ufs (95%) Hari + Hsp (70%) Psa + Mba (87%) Hapa + Skle (72%) Han2 + Scu3 (88%) Fau + Pam + Ado (88%) Nam + Ama + Pge2 (76%) Apauk + Cpo + Pqu (79%) Pep + Pno2 + Erw (98%) Pno2 + Erw (81%) Eaf + Meso + A369 (84%) Meso + A369 (96%) Nhe + Avu3 + Lem + Neo (96%) Avu3 + Lem + Neo (79%) **Lem + Neo (82%)** Lox + Bba + Cfr + Lean (80%) Bba + Cfr + Lean (70%)

2fin7 8: Mga + Pma2 (82%) Tor + Ahi (94%) Asa3 + ufs (100%) Bba + Lox (71%) Hari + Hsp (74%) May + Ein (76%) Psa + Mba (94%) Ive + Lly (91%) Pqu + Apauk + Cpo (100%) Pep + Pno2 + Erw (90%) Nhe + Lem + Neo + Avu3 (100%)

6fin: Lpo + Cro2 (100%) **Paq + Tom2 (84%)** Bba + Cfr (85%) Hari + Hsp (96%)

25fin: Thul + Mtd (76%) Meso + A369 (100%) May + Ein (100%) Ive + Lly (100%) Han2 + Scu3 (70%) Cpo + Apauk + Pqu (98%) **Apauk + Pqu (70%)** Hari + Hsp (77%) Bba + Lox (94%) **Eaf + Lem (70%)**

26fin: Lpo + Cro2 (71%) Paq + Tom2 (92%) Asa3 + ufs (74%) Hari + Hsp (70%) Lem + Avu3 (97%) May + Ein (90%) Hapa + Skle (99%) Eaf + Meso + A369 (77%) Meso + A369 (92%) Bba + Lean + Lox (84%) Lyn + Dma + Lle2 (70%) Pno2 + Erw + Pep (90%) Tor + Aeli + Ahi + Col2 + Ele (97%)

36fin: Pep + Pno2 + Erw (100%) Pno2 + Erw (85%) Paq + Tom2 (96%) Asa3 + ufs (99%) Psa + Mba (100%) **Spo + Ctas (82%)** Pqu + Apauk + Cpo (80%) Apauk + Cpo (96%) Lean + Bba + Lox (100%) Nhe + Avu3 + Lem + Neo (89%) **Lem + Neo (70%)** **Han2 + Scu3 + Aeli + Ahi + Tor + Col2 (72%)** Aeli + Ahi + Tor + Col2 (97%) **Tor + Col2 (75%)** Mga + Hari + Amb2 + Din2 + Pma2 + Pwh + Stp + Lpo + Cro2 + Lnig + Ipum = Euchelicerata (97%) Lpo + Cro2 (72%)

40fin: Thul + Mtd (88%) Lpo + Cro2 (97%) Asa3 + ufs (85%) Hari + Hsp (99%) May + Ein (99%) Pam + Ado (82%) Psa + Mba (100%) Ive + Lly (94%) Han2 + Scu3 (72%) Erw + Pep (93%) Mga + Stp (94%) Col2 + Tor + Ahi (71%) Tor + Ahi (93%) Pqu + Apauk + Cpo (95%) Apauk + Cpo (94%) Lean + Bba + Lox (89%) Lem + Avu3 + Nhe + Neo (81%) **Nhe + Neo (71%)** Tlo + Lyn + Dma + Lle2 (78%) Dma + Lle2 (96%)

42fin: Lpo + Cro2 (100%) Asa3 + ufs (100%) Hari + Hsp (100%) May + Ein (100%) Psa + Mba (100%) Ive + Lly (100%) Han2 + Scu3 (81%) Erw + Pep (100%) Meso + A369 + Eaf (100%) Lyn + Dma + Lle2 (82%) Dma + Lle2 (97%) Neo + Lem + Avu3 (94%) Lem + Avu3 (91%) Lean + Cfr + Bba + Lox (100%) **Cfr + Bba + Lox (78%)** **Bba + Lox (94%)** Aeli + Ahi + Ele + Tor + Col2 (97%) Paq + Oim + Tom2 (97%) Oim + Tom2 (74%) Apauk + Cpo + Pqu (99%)

44fin: Lpo + Cro2 (96%) **Tor + Ahi (71%)** Asa3 + ufs (100%) May + Ein (97%) Ive + Lly (91%) Han2 + Scu3 (77%) Pqu + Apauk + Cpo (70%) Apauk + Cpo (99%) Lox + Bba + Cfr (78%) Bba + Cfr (88%) Scol + Spo + Lfo + Ctas2 (76%) **Mga + Pma2 (72%)** Hari + Hsp (98%) Nhe + Lem + Neo + Avu3 (75%)

58fin3 6: Thul + Mtd (99%) Thul + Mtd + Erw (72%) Meso + Eaf (72%) Paq + Tom2 (72%) May + Ein (90%) Psa + Mba (94%) Aar + Dty (81%) Hapa + Skle (96%) Han2 + Scu3 (99%) Pge2 + Nam + Ama (91%) Bba + Lean + Lox (99%) Ive + Lly (92%) Apauk + Cpo + Pqu (100%) Nhe + Lem + Neo + Avu3 (100%) Tor + Aeli + Ahi + Col2 + Ele (100%) Mga + Stp (92%) Hari + Hsp (86%)

58fin7 9: Pno2 + Erw (92%) Pno2 + Erw + Pep (100%) May + Ein (90%) Ive + Lly (95%) A369 + Meso + Eaf (86%) **Meso + Eaf (72%)** Lox + Cfr + Bba + Lean (97%) **Bba + Lean (92%)** Ele + Aeli + Ahi + Col2 (77%) **Ahi + Col2 (74%)**

62fin: Thul + Mtd (98%) May + Ein (82%) Psa + Mba (75%) Ive + Lly (81%) Paq + Oim + Tom2 (97%) Oim + Tom2 (71%) Pqu + Apauk + Cpo (100%) Meso + A369 (98%) Nhe + Lem + Neo + Avu3 (91%) Erw + Pep (99%) Col2 + Ele + Tor + Aeli + Ahi (95%)



63fin: Thul + Mtd (100%) Pno2 + Erw + Pep (92%) Thul + Mtd + Pno2 + Erw + Pep (71%) Han2 + Scu3 (98%) Scol + Spol + Lfo + Ctas (87%) Col2 + Ele + Aeli + Tor + Ahi (94%) Ele + Aeli + Tor + Ahi (71%) Lpo + Cro2 (99%) Ach + Mga + Pma2 + Stp (75%) Mga + Pma2 + Stp (76%) Pancrustracea -- 42 taxa (71%) Asa3 + ufs (100%) May + Ein (84%) Pam + Ado (74%) Psa + Mba (93%) Ive + Lly (92%) Tom2 + Paq + Oim (84%) Pqu + Apauk + Cpo (92%) Apauk + Cpo (70%) Lox + Lean + Bba + Cfr (100%) Bba + Cfr (73%) **Eaf + Meso + A369 + Nhe + Avu3 + Lem + Neo (72%)** Eaf + Meso + A369 (92%) Avu3 + Lem + Neo (85%) **Lem + Neo (89%)**

69fin: Thul + Mtd (99%) Meso + A369 (100%) Asa3 + ufs (100%) May + Ein (98%) Ive + Lly (96%) Han2 + Scu3 (92%) Paq + Oim + Tom2 (90%) Cpo + Apauk + Pqu (99%) Lean + Bba + Cfr (85%) Pep + Pno2 + Erw (100%) Pno2 + Erw (95%) Col2 + Tor + Aeli + Ahi + Ele (77%) Euchelicerata -- 13 taxa (77%) Lpo + Cro2 (100%) Hari + Hsp (99%)

73fin: Lpo + Cro2 (100%) Cpo + Pqu (99%) Bba + Cfr (100%) Hari + Hsp (96%) May + Ein (98%) Psa + Mba (89%) **Lnig + Egig (70%)** Ive + Lly (96%) Erw + Pep (96%) Eaf + Meso + A369 (71%) Meso + A369 (98%) Tor + Aeli + Ahi + Col2 + Ele (96%) **Lyn + Asa3 + ufs (77%)** Asa3 + ufs (100%)

96fin: **Amb2 + Pwh (90%)** Meso + A369 (87%) Paq + Oim + Tom2 (88%)

109fin: Thul + Mtd (100%) Lpo + Cro2 (100%) Mga + Stp (82%) Asa3 + ufs (92%) Hari + Hsp (97%) Lean + Lox (96%) May + Ein (96%) Psa + Mba (91%) **Pol2 + Eury (71%)** Fau + Pam + Ado (80%) Nam + Ama + Pge2 (70%) Paq + Oim + Tom2 (100%) Oim + Tom2 (87%) Pqu + Apauk + Cpo (100%) Apauk + Cpo (100%) Neo + Lem + Avu3 (99%) Pno2 + Erw + Pep (99%) Col2 + Ele + Tor + Aeli (95%) Ele + Tor + Aeli (84%) Tor + Aeli (87%)

113fin: Thul + Mtd (100%) Han2 + Scu3 (99%) Lfo + Spo (98%) Lpo + Cro2 (100%) Hari + Hsp (99%) Erw + Pep (100%) Tor + Aeli + Col2 + Ele (100%) Pancrustacea -- 38 taxa (100%) Paq + Oim (100%) Jap + Efr (84%) Eaf + Meso + A369 (100%) Meso + A369 (100%) Lox + Cfr + Lean (100%) Cfr + Lean (98%) Dma + Lle2 (90%) Nhe + Lem + Neo + Avu3 (88%) Psa + Mba (100%) Pqu + Apauk + Cpo (99%) Apauk + Cpo (72%)

127fin: Thul + Mtd (98%) **Nam + Pge2 (86%)** **Paq + Oim (80%)** Apauk + Pqu (100%) Asa3 + ufs (97%) May + Ein (100%) Psa + Mba (95%) Ive + Lly (74%) Tor + Aeli + Ahi + Col2 + Ele (97%) Lpo + Cro2 (94%) Hari + Hsp (99%)

149fin: Tor + Aeli + Ahi + Ele + Col2 (100%) Han2 + Scu3 (100%) **Lfo + Spo + Ctas + Eury (74%)** Nam + Ama (81%) **Amb2 + Din2 (78%)** Lpo + Cro2 (100%) Hari + Hsp (100%) Meso + A369 (100%) Lem + Avu3 + Neo + Nhe (100%) Lem + Avu3 + Neo (96%) Lem + Avu3 (76%) Asa3 + ufs (100%) Dma + Lle2 (92%) Bba + Cfr + Lean + Lox (100%) Bba + Cfr + Lean (84%) Psa + Mba (100%) Insecta -- 10 taxa (96%) Dicondylia -- 8 taxa (85%) Fau + May + Ive + Lly (86%) Ive + Lly (100%) Oim + Tom2 + Paq (100%) Oim + Tom2 (97%) Meso + A369 + Eaf (99%) Lfo + Spo + Ctas (74%)

166fin: Thul + Mtd (75%) Meso + A369 (97%) Asa3 + ufs (97%) Bba + Cfr + Lean (79%)

192fin: Erw + Pep (95%) Lpo + Cro2 (74%) Apauk + Cpo (87%) Asa3 + ufs (99%) Bba + Cfr (98%) Hari + Hsp (95%) Psa + Mba (78%) Hapa + Skle (88%) Han2 + Scu3 (76%) Nhe + Lem + Neo (94%) Lem + Neo (80%) Ele + Tor + Aeli + Ahi (88%)

197fin: Erw + Pep (96%) Lpo + Cro2 (99%) Paq + Oim (100%) Bba + Lean (97%) Hari + Hsp (99%) Psa + Mba (98%) Ive + Lly (93%) Pqu + Apauk + Cpo (99%) Lfo + Scol + Spo + Ctas2 (79%) Nhe + Neo + Lem + Avu3 (91%) Neo + Lem + Avu3 (78%) Lem + Avu3 (80%) Col2 + Tor + Aeli + Ahi (100%) Tor + Aeli + Ahi (78%)

220fin: Erw + Pep (98%) Asa3 + ufs (100%) Hari + Hsp (95%) Psa + Mba (99%) Han2 + Scu3 (86%) Nam + Ama + Pge2 (89%) Bba + Cfr + Lean (100%) Lem + Neo (70%) Col2 + Tor + Aeli + Ahi + Ele (92%) Tor + Aeli + Ahi + Ele (72%) Oim + Tom2 (84%) Pqu + Apauk + Cpo (99%) Apauk + Cpo (79%)

226fin: Thul + Mtd (86%) Lpo + Cro2 (100%) Asa3 + ufs (100%) Hari + Hsp (98%) May + Ein (90%) Psa + Mba (100%) Ive + Lly (100%) Erw + Pep (96%) Ama + Nam + Pge2 (82%) Nam + Pge2 (71%) Lox + Bba + Lean (75%) Bba + Lean (90%) Lyn + Dma + Lle2 (99%) Apauk + Cpo (100%) Paq + Oim + Tom2 (93%) Tor + Aeli + Ahi + Col2 + Ele (96%)

247fin: Meso + A369 (99%) Apauk + Cpo (98%) Cfr + Lean (99%) Hari + Hsp (93%) May + Ein (97%) Pam + Ado (88%) Ive + Lly (75%) Han2 + Scu3 (76%) Erw + Pep (70%) Paq + Oim + Tom2 (76%) Oim + Tom2 (84%) Ahi + Tor + Aeli + Ele (80%)

262fin: Pep + Pno2 + Erw (97%) Lpo + Cro2 (100%) Asa3 + ufs (100%) Hari + Hsp (100%) Oim + Tom2 (100%) Psa + Mba (100%) Ive + Lly (92%) Meso + A369 (99%) Pqu + Apauk + Cpo (100%) Apauk + Cpo (71%) Lean + Cfr + Lox (100%) Nhe + Lem + Neo + Avu3 (98%)

265fin: Meso + A369 (96%) Hari + Hsp (98%) Psa + Mba (97%) Ahi + Tor + Aeli (98%) Tor + Aeli (84%) Pqu + Apauk + Cpo (78%) Bba + Lean (82%) Pno2 + Erw (100%) Nhe + Neo + Lem + Avu3 (75%)

267fin: Meso + A369 (100%) Asa3 + ufs (98%) Cli + Nme (84%) May + Ein (100%) Psa + Mba (98%) Han2 + Scu3 (100%) Lfo + Spo + Ctas2 (78%) Pqu + Apauk + Cpo (98%) Apauk + Cpo (91%) Pep + Pno2 + Erw (85%) Pno2 + Erw (84%) Nhe + Avu3 + Lem + Neo (94%) Lox + Lean + Bba + Cfr (100%) Bba + Cfr (88%) Col2 + Ele + Tor + Aeli + Ahi (88%) Tor + Aeli + Ahi (74%) Euchelicerata -- 14 taxa (72%) Lpo + Cro2 (100%)

268fin: Erw + Pep (91%) Lpo + Cro2 (100%) Han2 + Scu3 (90%) Ctas + Lfo + Scol (72%) **Lfo + Scol (90%)** Col2 + Aeli + Ahi (94%) Aeli + Ahi (77%) Nam + Ama + Pge2 (86%) Eaf + Meso + A369 (97%) Meso + A369 (100%) Paq + Oim + Tom2 (74%) Psa + Mba (100%) May + Ein (99%) Ive + Lly (87%) Pqu + Apauk + Cpo (98%) Apauk + Cpo (95%)

270fin: Lpo + Cro2 (96%) Hari + Hsp (80%) Psa + Mba (73%) Ive + Lly (98%) Col2 + Tor + Ele (72%) Lem + Neo + Avu3 (92%) Lean + Lox + Bba + Cfr (71%)

274fin: Meso + A369 (100%) Asa3 + ufs (100%) Han2 + Scu3 (74%) Pqu + Apauk + Cpo (100%) Apauk + Cpo (100%) Lean + Bba + Cfr (89%) Bba + Cfr (94%)

3006fin: Hari + Hsp (86%) Erw + Pno2 + Pep (97%) Col2 + Ele + Tor + Aeli + Ahi (78%) May + Ein (72%) Psa + Mba (99%) Ive + Lly (94%) Nhe + Lem + Neo + Avu3 (72%) Lox + Lean + Bba + Cfr (77%)

3007fin: Meso + A369 (100%) Nhe + Lem (74%) May + Lly (79%) Psa + Mba (99%) Paq + Oim + Tom2 (76%) Pqu + Apauk + Cpo (78%) Apauk + Cpo (100%) Cfr + Bba + Lox (99%) Scol + Ctas + Lfo + Spo (74%)

3009fin: Asa3 + ufs (95%) Hari + Hsp (84%) Tor + Aeli + Ahi + Col2 + Ele (94%)

3012fin: Lfo + Ctas (85%) Lpo + Cro2 (88%) Meso + A369 (100%) Asa3 + ufs (99%) Cli + Nme (80%) Hari + Hsp (99%) Psa + Mba (100%) Hapa + Skle (88%) Erw + Pep (92%) Apauk + Cpo (100%) Lox + Bba + Cfr (96%) Nhe + Lem + Neo + Avu3 (75%) Ele + Col2 + Ahi + Tor + Aeli (73%)

3017fin: Lpo + Cro2 (97%) Asa3 + ufs (100%) Hari + Hsp (98%) May + Ein (99%) Psa + Mba (100%) Erw + Pep (99%) Nam + Ama + Pge2 (78%) Aeli + Tor + Ele (89%) Pqu + Apauk + Cpo (100%) Apauk + Cpo (89%)

3031fin2\_3: Hari + Hsp (100%) Jap + Efr (89%) Oim + Paq + Tom2 (98%) Paq + Tom2 (98%) Scol + Lfo + Spo + Ctas (84%) Lem + Nhe + Neo + Avu3 (88%) Col2 + Tor + Ahi + Ele (85%) Lox + Lean + Bba + Cfr (100%) Lean + Bba + Cfr (91%) Bba + Cfr (87%) **Han2 + Scu3 + Pge2 + Nam + Ama (78%)** Han2 + Scu3 (93%) Pge2 + Nam + Ama (95%) Asa3 + ufs + Lyn + Dma + Lle2 (83%) Asa3 + ufs (100%) Lyn + Dma + Lle2 + Meso (92%) Dma + Lle2 (92%) Psa + Mba (98%) Cpo + Pqu (100%) Ive + Lly (100%)

3031fin4\_5: Nhe + Avu3 (74%) Dma + Lle2 (70%) Psa + Mba (99%) Ive + Lly (99%) Han2 + Scu3 (96%) Paq + Oim + Tom2 (99%) Apauk + Cpo + Pqu (90%) Pep + Pno2 + Erw (100%) Pno2 + Erw (99%) Bba + Cfr + Lean (74%) Arachnida -- 12 taxa (88%)

3044fin: Lpo + Cro2 (94%) Meso + Eaf (76%) Asa3 + ufs (90%) Ive + Lly (98%) Pqu + Apauk + Cpo (96%) Apauk + Cpo (76%) Pep + Pno2 + Erw (87%) Pno2 + Erw (87%) Tlo + Lyn + Dma + Lle2 (77%) Ahi + Tor + Col2 + Ele (79%)

3055fin: Meso + A369 (100%) May + Ein (74%) Han2 + Scu3 (76%) Bba + Cfr (73%) Pep + Pno2 + Erw (71%) Jap + Efr (71%) Paq + Oim + Tom2 (81%)

3059fin: Thul + Mtd (100%) Nam + Ama (75%) Asa3 + ufs (100%) Cli + Nme (70%) Dma + Lle2 (99%) Hari + Hsp (81%) Ive + Lly (95%) Erw + Pep (100%) Ado + Fau + Pam (80%) Eaf + Meso + A369 (100%) Meso + A369 (100%) Mga + Pma2 + Stp (72%) Paq + Oim + Tom2 (100%) Oim + Tom2 (83%) Pqu + Apauk + Cpo (100%) Apauk + Cpo (76%) Lean + Bba + Cfr (100%) Bba + Cfr (72%) Nhe + Lem + Neo + Avu3 (88%) Tor + Aeli + Ahi + Col2 (99%)

3064fin: Thul + Mtd (100%) Pep + Pno2 + Erw (93%) Pno2 + Erw (91%) Tardigrada + Onychophora -- 5 taxa (76%) Asa3 + ufs (91%) Dma + Lle2 (92%) Hari + Hsp (98%) May + Ein (100%) Hapa + Skle (100%) Ive + Lly (92%) Han2 + Scu3 (94%) Eaf + Meso + A369 (74%) Neo + Nhe + Avu3 (87%) Lox + Bba + Cfr + Lean (98%) Bba + Cfr + Lean (86%) Ele + Tor + Aeli + Ahi + Col2 (92%)

3066fin: Erw + Pep (94%) Myriapoda -- 8 taxa (74%) Onychophora + Myriapoda -- 10 taxa (70%) Lpo + Cro2 (100%) Hari + Hsp (100%) Tor + Col2 (88%) Arg2 + Aar (85%) Lem + Avu3 + Neo + Nhe (100%) Lem + Avu3 (87%) Lyn + Lle2 (83%) A369 + Eaf (97%) Oim + Tom2 (73%) May + Ein (90%) Cpo + Pqu (100%) Fau + Ado + Pam (96%) **Fau + Ado (93%)** Ive + Lly (99%)

3070fin: Thul + Mtd (100%) Lpo + Cro2 (98%) Asa3 + ufs (97%) Cfr + Lox (98%) Hari + Hsp (84%) Tom2 + Paq + Oim (87%) Tlo + Lyn + Dma + Lle2 (84%) Lyn + Dma + Lle2 (92%) Fau + Ado (77%) Ive + Lly (98%) Apauk + Cpo (94%)

3089fin: Thul + Mtd (100%) Hapa + Skle (94%) Meso + A369 (99%) Mga + Stp (80%) Asa3 + ufs (100%) Ive + Lly (76%) **Col2 + Ele (74%)** Nam + Ama (74%) Oim + Tom2 (80%) Bba + Cfr + Lean (100%) **Stu + Apauk + Cpo + Pqu (87%)** Apauk + Cpo + Pqu (100%)

3094fin: Meso + Eaf (71%) Asa3 + ufs (82%) Lem + Neo (92%) Hapa + Skle (79%) Erw + Pep (79%) Bba + Cfr + Lean + Lox (78%)

3114fin: Nam + Pge2 (73%) Cpo + Pqu (72%) May + Ein (88%) Ive + Lly (96%) Pno2 + Erw (100%) Spo + Lfo + Ctas (94%) Lfo + Ctas (76%) Bba + Cfr + Lean (70%) Tor + Aeli + Ahi + Ele (95%)

3121fin: Thul + Mtd (77%) Meso + A369 (98%) Apauk + Pqu (99%) Asa3 + ufs (99%) May + Ein (89%) Ive + Lly (78%) Dma + Lle2 (86%) Pep + Pno2 + Erw (82%) Pno2 + Erw (99%) Avu3 + Nhe + Lem + Neo (96%) Nhe + Lem + Neo (90%) Lem + Neo (92%) Ahi + Tor + Aeli + Ele (94%)

3136fin: Thul + Mtd (99%) Lpo + Cro2 (100%) Asa3 + ufs (100%) Hari + Hsp (100%) Jap + Efr (73%) Erw + Pep (99%) Nhe + Neo + Lem + Avu3 (78%) Lean + Lox + Bba + Cfr (82%) Bba + Cfr (78%) Tor + Col2 + Ele + Aeli + Ahi (96%) Insecta -- 14 taxa (100%) May + Ein (99%) Ive + Lly (80%) Neoptera -- 6 taxa (79%) Pam + Ado (91%) Apauk + Cpo + Pqu (100%)

3152fin: Arg2 + Aar (74%) Bba + Lean (82%) Hari + Hsp (91%) May + Ein (92%)

3153fin: Lpo + Cro2 (72%) Meso + A369 (97%) Asa3 + ufs (77%) Hari + Hsp (99%) Psa + Mba (86%) Ive + Lly (78%) Han2 + Scu3 (98%) Cpo + Apauk + Pqu (86%) Cfr + Bba + Lean (92%) Pno2 + Erw + Pep (92%) Col2 + Ele + Tor + Aeli + Ahi (74%) Tor + Aeli + Ahi (75%)

3196fin1 3: Thul + Mtd (99%) Meso + A369 (96%) Asa3 + ufs (70%) Hari + Hsp (95%) May + Ein (93%) Psa + Mba (95%) Paq + Oim + Tom2 (94%) Oim + Tom2 (76%) Lox + Bba + Cfr (100%) Bba + Cfr (94%) Lem + Avu3 + Nhe + Neo (100%) Tor + Ahi + Col2 + Aeli + Ele (91%) **Aeli + Ele (71%)**

3196fin5 6: Lpo + Cro2 (100%) Hari + Hsp (98%) Pno2 + Pep (100%) Pycnogonida -- 5 taxa (100%) Meso + Eaf (98%) Asa3 + ufs (100%) Pam + Ado (74%) Psa + Mba (100%) Ive + Lly (73%) Paq + Oim + Tom2 (71%) Oim + Tom2 (70%) Pqu + Apauk + Cpo (99%) Apauk + Cpo (74%) Lem + Nhe + Neo + Avu3 (100%) **Nhe + Neo + Avu3 (77%)** Dma + Lle2 + Tlo + Lyn (72%) Bba + Cfr + Lean + Lox (98%) Bba + Cfr (72%)

3202fin: Thul + Mtd (99%) Lpo + Cro2 (100%) Meso + Eaf (99%) May + Ein (90%) Psa + Mba (96%) Ive + Lly (100%) Han2 + Scu3 (94%) Nhe + Lem + Avu3 (100%) Paq + Oim + Tom2 (100%) Apauk + Cpo + Pqu (94%) Lox + Bba + Lean (91%) Bba + Lean (81%) Pep + Pno2 + Erw (88%) Pno2 + Erw (100%) Ama + Pge2 (74%) Col2 + Aeli + Tor + Ahi (90%)

8018fin: Lpo + Cro2 (98%) Asa3 + ufs (93%) Cfr + Lean (94%) Hari + Hsp (99%) May + Ein (84%) Oim + Tom2 (100%) Ive + Lly (90%) Pqu + Apauk + Cpo (98%) Apauk + Cpo (96%)

8028fin: Tlo + Lle2 (76%) Bba + Cfr (95%) Hari + Hsp (93%) Hapa + Skle (93%) Pep + Pno2 + Erw (94%) Pno2 + Erw (80%) Ahi + Col2 + Tor + Aeli + Ele (75%) Tor + Aeli + Ele (72%) Aeli + Ele (72%)

8029fin: Cpo + Pqu (98%) Arg2 + Aar (82%) Asa3 + ufs (100%) May + Ein (98%) Psa + Mba (82%) Ive + Lly (86%) Paq + Oim Tom2 (98%) Oim + Tom2 (99%) Pep + Pno2 + Erw (72%) Pno2 + Erw (98%) Meso + A369 (100%) Tor + Aeli + Ahi + Col2 + Ele (99%)

8053fin: Pno2 + Erw + Pep (100%) Pno2 + Erw (97%) Han2 + Scu3 (100%) Ahi + Ele + Col2 + Tor + Aeli (98%) Lpo + Cro2 (96%) Jap + Efr (86%) Asa3 + ufs (100%) Apauk + Cpo + Pqu (100%) Apauk + Cpo (76%) Ive + Lly (100%) May + Ein (100%)

8070fin: Lpo + Cro2 (99%) Meso + A369 (99%) Nhe + Lem (96%) Cli + Nme (78%) Hari + Hsp (95%) May + Ein (98%) Psa + Mba (80%) Ive + Lly (97%) Apauk + Cpo + Pqu (99%) Bba + Cfr + Lean + Lox (96%)

8091fin: Lpo + Cro2 (99%) Nam + Pge2 (81%) Tor + Ahi (100%) Asa3 + ufs (94%) Hari + Hsp (100%) Psa + Mba (96%) Ive + Lly (97%) Eaf + Meso + A369 (82%) Meso + A369 (100%) Apauk + Cpo + Pqu (96%)

acc: Asa3 + ufs (100%) Hari + Hsp (92%) Eaf + Meso + A369 (77%) Meso + A369 (100%) Pqu + Apauk + Cpo (98%) Apauk + Cpo (75%) Lean + Bba + Cfr (100%) Pep + Pno2 + Erw (100%) Pno2 + Erw (81%) Lem + Neo + Nhe + Avu3 (100%) Tor + Ahi + Aeli + Col2 + Ele (100%) **Col2 + Ele (70%)**

aspec2 6: Lpo + Cro2 (98%) Hari + Hsp (97%) Paq + Oim + Tom2 (98%) Lean + Bba + Cfr (97%)

aspec19 21: Thul + Mtd (100%) Pep + Pno2 + Erw (83%) Pno2 + Erw (94%) Thul + Mtd + Pep + Pno2 + Erw (70%) Fau + Pam (86%) Asa3 + ufs (95%) Dma + Lle2 (85%) Paq + Oim + Tom2 (95%) Bba + Cfr + Lean (80%) **Cfr + Lean (71%)** Nhe + Lem + Neo + Avu3 (72%) Col2 + Aeli + Ele + Tor + Ahi (91%) Aeli + Ele + Tor + Ahi (73%)

aspec11 12: Lpo + Cro2 (100%) **Amb2 + Pwh (82%) Lfo + Ctas (83%)** Lfo + Ctas2 + Scol + Spo (70%) Tor + Aeli (74%) Tor + Aeli + Ahi + Ele + Col2 (98%) Neo + Avu3 + Nhe + Lem (99%) **Bba + Lean (89%)** Bba + Lean + Cfr (100%) **Paq + Tom2 (71%)** Paq + Tom2 + Oim (100%) Dma + Lle2 (72%) Asa3 + ufs (93%) Apauk + Cpo + Pqu (100%) Meso + Eaf (79%) Thul + Mtd (100%)

ef2: May + Ein (98%) Psa + Mba (99%) **Paq + Tom2 (70%)** Paq + Tom2 + Oim (93%) Stu + Hma (73%) Asa3 + ufs (100%) Dma + Lle2 (73%) Branchiopoda -- 5 taxa (83%) Arg2 + Aar (86%) Hapa + Ost (97%) Neo + Avu3 + Lem (70%) Neo + Avu3 + Lem + Nhe (100%) **Bba + Lean (90%)** Bba + Lean + Cfr (84%) Bba + Lean + Cfr + Lox (100%) Hari + Hsp (99%) Euchelcerata -- 15 taxa (95%) Lpo + Cro2 (100%) Pycnogonida -- 5 taxa (99%) Tor + Aeli (93%) Tor + Aeli + Ahi + Ele (96%) Myriapoda -- 11 taxa (87%) Han2 + Scu3 (100%) Ama + Pge2 (84%) Ama + Pge2 + Nam (77%) Thul + Mtd (100%) Erw + Pep (99%)

polii: Ive + Lly (99%) May + Ein (100%) Fau + Ado + Pam (76%) Psa + Mba (100%) Paq + Tom2 + Oim (92%) Asa3 + ufs (100%) Dma + Lle2 (89%) Branchipoda -- 6 taxa (91%) Malacostraca -- 4 taxa (100%) Thecostraca -- 4 taxa (100%) Copepoda -- 3 taxa (100%) Meso + A369 (100%) Arg2 + Aar (87%) Hapa + Skle (100%) Pancrustacea -- 40 taxa (100%) Mandibulata -- 51 taxa (70%) Ama + Pge2 (76%) Lfo + Spo (96%) Han2 + Scu3 (100%) Mga + Stp (91%) Hari + Hsp (100%) Lpo + Cro2 (100%) **Din2 + Ipum (90%)** Euchelicerata -- 15 taxa (94%) Chelicerata -- 20 taxa (90%) Pycnogonida -- 5 taxa (100%) **Aeli + Col2 (78%)** Pno2 + Erw (84%) Pno2 + Erw + Pep (100%) Thul + Mtd (95%)

efla: Lpo + Cro2 (100%) Euchelicerata -- 15 taxa (97%) Hari + Hsp (93%) Copepoda -- 3 taxa (93%) Meso + A369 (95%) Diplopoda -- 4 taxa (78%) Malacostraca + Thecostraca -- 8 taxa (76%) Malacostraca -- 4 taxa (100%) Lem + Neo + Avu3 (88%) **Neo + Avu3 (74%)** Thecostraca -- 4 taxa (100%) Bba + Cfr + Lean (96%) Bba + Cfr (97%) **Paq + Tom2 (72%)** Branchiopoda -- 6 taxa (71%) Asa3 + ufs (82%) Pycnogonida -- 5 taxa (99%) **Col2 + Ele (82%)** Apauk + Cpo + Pqu (100%) Cli + Nme (94%) Psa + Mba (96%) May + Ein (94%) Hapa + Skle (100%) Ive + Lly (99%) Han2 + Scu3 (86%) Onychophora -- 3 taxa (96%) Pno2 + Erw (92%) Thul + Mtd (100%)

**SUMMARY**

- Total number of groups listed that have BP  $\geq$  70% = 899.
- Total number of groups listed that have BP  $\geq$  70% and that are present in combined result with BP  $\geq$  80% = 854. (854/899 = 0.95)
- Total number of groups in single-gene results that have BP  $\geq$  70% and that conflict with nodes that are strongly (BP  $\geq$  80%) supported in the combined result = 39. Note that missing taxa are taken into account in tabulating this statistic.
- Of the 39 distinct, strongly conflicting groups, 30 occur once, three occur three times (Lem + Neo, Bba + Lean, Col + Ele), and one occurs four times (Paq + Tom2).
- Of the 30 distinct, strongly conflicting groups, 7 include >2 terminal taxa, but only one of these (Stu + Apauk + Cpo + Pqu) has BP  $\geq$  80%.

Number of single genes supporting newly named groups (in bold) and other higher-level groups with BP  $\geq$  70% that are also present in combined result:

- **Xenocarida:** 1 (ef2 -- 73%)
- **Altocrustacea:** 0
- **Miracrustacea:** 0
- **Vericrustacea:** 0
- **Multicrustacea:** 0
- **Communostraca:** 1 (ef1a -- 76%)
- Arthropoda: 6 (This is a minimum estimate since only those cases in which there were representatives of Onychophora and Tardigrada were included.)
- Mandibulata: 1 (Pol II -- 70%)
- Pancrustacea: 2
- Myriapoda: 2
- Hexapoda: 0
- Insecta: 2
- Arachnida: 2
- Euchelicerata: 8
- Pycnogonida: 40

---

\*, 500 bootstrap replicates (1 search replicate / bootstrap replicate) were performed for each individual gene segment, using a degen1 data set that was analyzed under a GTR + gamma + invariant model of nucleotide change. Groups in black are present in the single-gene-region results and in the combined-gene results. Groups highlighted in red are not present in the combined result; instead, groups present in the combined result strongly ( $\geq$  80% BP) support an alternative grouping. Groups highlighted in blue are not present in the combined result, but BP support for the combined alternative is low. Proper interpretation of this table requires knowing which taxa failed to yield sequences for particular genes (available in Supplementary Table 2).

**Supplementary Table 4.** GenBank accession numbers for 80 taxa.

|            |          |            |          |
|------------|----------|------------|----------|
| 2fin3_4:   |          | HmaCEPHAL  | GQ886782 |
| A369COPE   | GQ886751 | HspARACH   | GQ886783 |
| AarPENTA   | GQ886752 | IpumARACH  | GQ886784 |
| AchARACH   | GQ886753 | IveODONAT  | GQ886785 |
| AdoNEOPT   | GQ886754 | JapDIPLUR  | GQ886786 |
| AeliPYCNO  | GQ886755 | LeanTHECOS | GQ886787 |
| AhiPYCNO   | GQ886756 | LemMALA    | GQ886788 |
| AmaDIPLO   | GQ886757 | Lle2BRANCH | GQ886789 |
| Amb2ARACH  | GQ886758 | LlyODONAT  | GQ886790 |
| Arg2BIURA  | GQ886759 | LnigARACH  | GQ886791 |
| Asa3BRANCH | GQ886760 | LoxTHECOS  | GQ886792 |
| Avu3MALA   | GQ886761 | LynBRANCH  | GQ886793 |
| BbaTHECOS  | GQ886762 | MbaARCHEO  | GQ886794 |
| CfrTHECOS  | GQ886763 | MtdTARD    | GQ886795 |
| ClizYGEN   | GQ886764 | NeoMALA    | GQ886796 |
| Col2PYCNO  | GQ886765 | NmeZYGEN   | GQ886797 |
| Cro2XIPHOS | GQ886766 | OimCOLL    | GQ886798 |
| Crp2ARACH  | GQ886767 | PamNEOPT   | GQ886799 |
| Ctas2CHILO | GQ886768 | PepONYCH   | GQ886800 |
| Din2ARACH  | GQ886769 | Pge2DIPLO  | GQ886801 |
| DmaBRANCH  | GQ886770 | Pma2ARACH  | GQ886802 |
| DtyMYSTACO | GQ886771 | Pno2ONYCH  | GQ886803 |
| EafCOPE    | GQ886772 | Pol2DIPLO  | GQ886804 |
| EfrDIPLUR  | GQ886773 | PsaARCHEO  | GQ886805 |
| EgigARACH  | GQ886774 | PwhARACH   | GQ886806 |
| EinEPHEM   | GQ886775 | ScolCHILO  | GQ886807 |
| ElePYCNO   | GQ886776 | Scu3SYMPH  | GQ886808 |
| ErwONYCH   | GQ886777 | SkleOST    | GQ886809 |
| EuryPAURO  | GQ886778 | SpoCHILO   | GQ886810 |
| Han2SYMPH  | GQ886779 | StpARACH   | GQ886811 |
| HapaOST    | GQ886780 | Tom2COLL   | GQ886812 |
| HariARACH  | GQ886781 | UfsBRANCH  | GQ886813 |

2fin7\_8:

|            |          |
|------------|----------|
| AarPENTA   | GQ886814 |
| AchARACH   | GQ886815 |
| AdoNEOPT   | GQ886816 |
| AhiPYCNO   | GQ886817 |
| AmaDIPLO   | GQ886818 |
| Amb2ARACH  | GQ886819 |
| Arg2BIURA  | GQ886820 |
| Asa3BRANCH | GQ886821 |
| Avu3MALA   | GQ886822 |
| BbaTHECOS  | GQ886823 |
| ClizYGEN   | GQ886824 |
| Crp2ARACH  | GQ886825 |
| Ctas2CHILO | GQ886826 |
| Din2ARACH  | GQ886827 |
| EafCOPE    | GQ886828 |
| EfrDIPLUR  | GQ886829 |
| EinEPHEM   | GQ886830 |
| ErwONYCH   | GQ886831 |
| EuryPAURO  | GQ886832 |
| Han2SYMPH  | GQ886833 |
| HariARACH  | GQ886834 |
| HspARACH   | GQ886835 |
| IpumARACH  | GQ886836 |
| IveODONAT  | GQ886837 |
| LemMALA    | GQ886838 |
| LlyODONAT  | GQ886839 |
| LnigARACH  | GQ886840 |
| LoxTHECOS  | GQ886841 |
| LynBRANCH  | GQ886842 |
| MayEPHEM   | GQ886843 |
| MbaARCHEO  | GQ886844 |
| NeoMALA    | GQ886845 |
| NmeZYGEN   | GQ886846 |
| PamNEOPT   | GQ886847 |
| PepONYCH   | GQ886848 |
| Pma2ARACH  | GQ886849 |
| Pno2ONYCH  | GQ886850 |
| Pol2DIPLO  | GQ886851 |
| PsaARCHEO  | GQ886852 |
| ScolCHILO  | GQ886853 |
| Scu3SYMPH  | GQ886854 |
| SkleOST    | GQ886855 |
| SpochILO   | GQ886856 |
| UfsBRANCH  | GQ886857 |



6fin:

|            |          |
|------------|----------|
| AarPENTA   | GQ886858 |
| AchARACH   | GQ886859 |
| AhiPYCNO   | GQ886860 |
| AmaDIPLO   | GQ886861 |
| Amb2ARACH  | GQ886862 |
| Arg2BIURA  | GQ886863 |
| Avu3MALA   | GQ886864 |
| BbaTHECOS  | GQ886865 |
| CfrTHECOS  | GQ886866 |
| Col2PYCNO  | GQ886867 |
| Cro2XIPHOS | GQ886868 |
| Crp2ARACH  | GQ886869 |
| Ctas2CHILO | GQ886870 |
| DmaBRANCH  | GQ886871 |
| DtyMYSTACO | GQ886872 |
| EfrDIPLUR  | GQ886873 |
| EinEPHEM   | GQ886874 |
| ErwONYCH   | GQ886875 |
| EuryPAURO  | GQ886876 |
| Han2SYMPH  | GQ886877 |
| HariARACH  | GQ886878 |
| HspARACH   | GQ886879 |
| IpumARACH  | GQ886880 |
| LemMALA    | GQ886881 |
| LnigARACH  | GQ886882 |
| LoxTHECOS  | GQ886883 |
| MbaARCHEO  | GQ886884 |
| MtdTARD    | GQ886885 |
| NeoMALA    | GQ886886 |
| OimCOLL    | GQ886887 |
| PamNEOPT   | GQ886888 |
| PepONYCH   | GQ886889 |
| Pma2ARACH  | GQ886890 |
| Pol2DIPLO  | GQ886891 |
| PsaARCHEO  | GQ886892 |
| ScolCHILO  | GQ886893 |
| Scu3SYMPH  | GQ886894 |
| Tom2COLL   | GQ886895 |
| UfsBRANCH  | GQ886896 |

25fin:

|            |          |
|------------|----------|
| A369COPE   | GQ886897 |
| AdoNEOPT   | GQ886898 |
| AeliPYCNO  | GQ886899 |
| AhiPYCNO   | GQ886900 |
| AmaDIPLO   | GQ886901 |
| Amb2ARACH  | GQ886902 |
| Arg2BIURA  | GQ886903 |
| Asa3BRANCH | GQ886904 |
| BbaTHECOS  | GQ886905 |
| ClizYGEN   | GQ886906 |
| Col2PYCNO  | GQ886907 |
| Cro2XIPHOS | GQ886908 |
| Crp2ARACH  | GQ886909 |
| Ctas2CHILO | GQ886910 |
| Din2ARACH  | GQ886911 |
| DmaBRANCH  | GQ886912 |
| DtyMYSTACO | GQ886913 |
| EafCOPE    | GQ886914 |
| EfrDIPLUR  | GQ886915 |
| EgigARACH  | GQ886916 |
| EinEPHEM   | GQ886917 |
| ElePYCNO   | GQ886918 |
| ErwONYCH   | GQ886919 |
| EuryPAURO  | GQ886920 |
| Han2SYMPH  | GQ886921 |
| HariARACH  | GQ886922 |
| HspARACH   | GQ886923 |
| IpumARACH  | GQ886924 |
| IveODONAT  | GQ886925 |
| JapDIPLUR  | GQ886926 |
| LemMALA    | GQ886927 |
| Lle2BRANCH | GQ886928 |
| LlyODONAT  | GQ886929 |
| LnigARACH  | GQ886930 |
| LoxTHECOS  | GQ886931 |
| LynBRANCH  | GQ886932 |
| MayEPHEM   | GQ886933 |
| MbaARCHEO  | GQ886934 |
| MtdTARD    | GQ886935 |
| NmeZYGEN   | GQ886936 |
| OimCOLL    | GQ886937 |
| PamNEOPT   | GQ886938 |
| PepONYCH   | GQ886939 |
| Pge2DIPLO  | GQ886940 |
| Pma2ARACH  | GQ886941 |
| Pno2ONYCH  | GQ886942 |
| Pol2DIPLO  | GQ886943 |
| PsaARCHEO  | GQ886944 |
| PwhARACH   | GQ886945 |
| ScolCHILO  | GQ886946 |
| Scu3SYMPH  | GQ886947 |
| SpoCHILO   | GQ886948 |
| StpARACH   | GQ886949 |
| Tom2COLL   | GQ886950 |
| UfsBRANCH  | GQ886951 |

26fin:

|            |          |
|------------|----------|
| A369COPE   | GQ886952 |
| AarPENTA   | GQ886953 |
| AchARACH   | GQ886954 |
| AdoNEOPT   | GQ886955 |
| AeliPYCNO  | GQ886956 |
| AhiPYCNO   | GQ886957 |
| AmaDIPLO   | GQ886958 |
| Amb2ARACH  | GQ886959 |
| Arg2BIURA  | GQ886960 |
| Asa3BRANCH | GQ886961 |
| Avu3MALA   | GQ886962 |
| BbaTHECOS  | GQ886963 |
| ClizYGEN   | GQ886964 |
| Col2PYCNO  | GQ886965 |
| Cro2XIPHOS | GQ886966 |
| Crp2ARACH  | GQ886967 |
| Ctas2CHILO | GQ886968 |
| Din2ARACH  | GQ886969 |
| DmaBRANCH  | GQ886970 |
| DtyMYSTACO | GQ886971 |
| EafCOPE    | GQ886972 |
| EgigARACH  | GQ886973 |
| EinEPHEM   | GQ886974 |
| ElePYCNO   | GQ886975 |
| ErwONYCH   | GQ886976 |
| EuryPAURO  | GQ886977 |
| Han2SYMPH  | GQ886978 |
| HapaOST    | GQ886979 |
| HariARACH  | GQ886980 |
| HspARACH   | GQ886981 |
| IpumARACH  | GQ886982 |
| IveODONAT  | GQ886983 |
| LeanTHECOS | GQ886984 |
| LemMALA    | GQ886985 |
| Lle2BRANCH | GQ886986 |
| LlyODONAT  | GQ886987 |
| LnigARACH  | GQ886988 |
| LoxTHECOS  | GQ886989 |
| LynBRANCH  | GQ886990 |
| MayEPHEM   | GQ886991 |
| MbaARCHEO  | GQ886992 |
| NmeZYGEN   | GQ886993 |
| PamNEOPT   | GQ886994 |
| PepONYCH   | GQ886995 |
| Pge2DIPLO  | GQ886996 |
| Pma2ARACH  | GQ886997 |
| Pno2ONYCH  | GQ886998 |
| Pol2DIPLO  | GQ886999 |
| PwhARACH   | GQ887000 |
| ScolCHILO  | GQ887001 |
| Scu3SYMPH  | GQ887002 |
| SkleOST    | GQ887003 |
| SpoCHILO   | GQ887004 |
| StpARACH   | GQ887005 |
| Tom2COLL   | GQ887006 |
| UfsBRANCH  | GQ887007 |

36fin:

|            |          |
|------------|----------|
| AdoNEOPT   | GQ887008 |
| AeliPYCNO  | GQ887009 |
| AhiPYCNO   | GQ887010 |
| AmaDIPLO   | GQ887011 |
| Amb2ARACH  | GQ887012 |
| Asa3BRANCH | GQ887013 |
| Avu3MALA   | GQ887014 |
| BbaTHECOS  | GQ887015 |
| ClizYGEN   | GQ887016 |
| Col2PYCNO  | GQ887017 |
| Cro2XIPHOS | GQ887018 |
| Ctas2CHILO | GQ887019 |
| Din2ARACH  | GQ887020 |
| DmaBRANCH  | GQ887021 |
| EafCOPE    | GQ887022 |
| EinEPHEM   | GQ887023 |
| ErwONYCH   | GQ887024 |
| EuryPAURO  | GQ887025 |
| Han2SYMPH  | GQ887026 |
| HariARACH  | GQ887027 |
| IpumARACH  | GQ887028 |
| IveODONAT  | GQ887029 |
| JapDIPLUR  | GQ887030 |
| LeanTHECOS | GQ887031 |
| LemMALA    | GQ887032 |
| Lle2BRANCH | GQ887033 |
| LlyODONAT  | GQ887034 |
| LnigARACH  | GQ887035 |
| LoxTHECOS  | GQ887036 |
| LynBRANCH  | GQ887037 |
| MayEPHEM   | GQ887038 |
| MbaARCHEO  | GQ887039 |
| NeoMALA    | GQ887040 |
| NmeZYGEN   | GQ887041 |
| PamNEOPT   | GQ887042 |
| PepONYCH   | GQ887043 |
| Pge2DIPLO  | GQ887044 |
| Pma2ARACH  | GQ887045 |
| Pno2ONYCH  | GQ887046 |
| Pol2DIPLO  | GQ887047 |
| PsaARCHEO  | GQ887048 |
| PwhARACH   | GQ887049 |
| ScolCHILO  | GQ887050 |
| Scu3SYMPH  | GQ887051 |
| SkleOST    | GQ887052 |
| SpoCHILO   | GQ887053 |
| StpARACH   | GQ887054 |
| Tom2COLL   | GQ887055 |
| UfsBRANCH  | GQ887056 |

40fin:

|            |          |
|------------|----------|
| A369COPE   | GQ887057 |
| AarPENTA   | GQ887058 |
| AchARACH   | GQ887059 |
| AdoNEOPT   | GQ887060 |
| AhiPYCNO   | GQ887061 |
| AmaDIPLO   | GQ887062 |
| Amb2ARACH  | GQ887063 |
| Arg2BIURA  | GQ887064 |
| Asa3BRANCH | GQ887065 |
| Avu3MALA   | GQ887066 |
| BbaTHECOS  | GQ887067 |
| ClizYGEN   | GQ887068 |
| Col2PYCNO  | GQ887069 |
| Cro2XIPHOS | GQ887070 |
| Crp2ARACH  | GQ887071 |
| Ctas2CHILO | GQ887072 |
| Din2ARACH  | GQ887073 |
| DmaBRANCH  | GQ887074 |
| EafCOPE    | GQ887075 |
| EfrDIPLUR  | GQ887076 |
| EgigARACH  | GQ887077 |
| EinEPHEM   | GQ887078 |
| ErwONYCH   | GQ887079 |
| EuryPAURO  | GQ887080 |
| Han2SYMPH  | GQ887081 |
| HariARACH  | GQ887082 |
| HmaCEPHAL  | GQ887083 |
| HspARACH   | GQ887084 |
| IpumARACH  | GQ887085 |
| IveODONAT  | GQ887086 |
| JapDIPLUR  | GQ887087 |
| LeanTHECOS | GQ887088 |
| LemMALA    | GQ887089 |
| Lle2BRANCH | GQ887090 |
| LlyODONAT  | GQ887091 |
| LnigARACH  | GQ887092 |
| LoxTHECOS  | GQ887093 |
| LynBRANCH  | GQ887094 |
| MayEPHEM   | GQ887095 |
| MbaARCHEO  | GQ887096 |
| MtdTARD    | GQ887097 |
| NeoMALA    | GQ887098 |
| NmeZYGEN   | GQ887099 |
| OimCOLL    | GQ887100 |
| PamNEOPT   | GQ887101 |
| PepONYCH   | GQ887102 |
| Pge2DIPLO  | GQ887103 |
| Pma2ARACH  | GQ887104 |
| Pno2ONYCH  | GQ887105 |
| Pol2DIPLO  | GQ887106 |
| PsaARCHEO  | GQ887107 |
| PwhARACH   | GQ887108 |
| ScolCHILO  | GQ887109 |
| Scu3SYMPH  | GQ887110 |
| SkleOST    | GQ887111 |
| SpoCHILO   | GQ887112 |
| StpARACH   | GQ887113 |
| UfsBRANCH  | GQ887114 |

42fin:

|            |          |
|------------|----------|
| A369COPE   | GQ887115 |
| AarPENTA   | GQ887116 |
| AchARACH   | GQ887117 |
| AdoNEOPT   | GQ887118 |
| AeliPYCNO  | GQ887119 |
| AhiPYCNO   | GQ887120 |
| AmaDIPLO   | GQ887121 |
| Amb2ARACH  | GQ887122 |
| Arg2BIURA  | GQ887123 |
| Asa3BRANCH | GQ887124 |
| Avu3MALA   | GQ887125 |
| BbaTHECOS  | GQ887126 |
| CfrTHECOS  | GQ887127 |
| ClizYGEN   | GQ887128 |
| Col2PYCNO  | GQ887129 |
| Cro2XIPHOS | GQ887130 |
| Crp2ARACH  | GQ887131 |
| Ctas2CHILO | GQ887132 |
| Din2ARACH  | GQ887133 |
| DmaBRANCH  | GQ887134 |
| DtyMYSTACO | GQ887135 |
| EafCOPE    | GQ887136 |
| EgigARACH  | GQ887137 |
| EinEPHEM   | GQ887138 |
| ElePYCNO   | GQ887139 |
| ErwONYCH   | GQ887140 |
| Han2SYMPH  | GQ887141 |
| HariARACH  | GQ887142 |
| HspARACH   | GQ887143 |
| IveODONAT  | GQ887144 |
| JapDIPLUR  | GQ887145 |
| LeanTHECOS | GQ887146 |
| LemMALA    | GQ887147 |
| Lle2BRANCH | GQ887148 |
| LlyODONAT  | GQ887149 |
| LoxTHECOS  | GQ887150 |
| LynBRANCH  | GQ887151 |
| MayEPHEM   | GQ887152 |
| MbaARCHEO  | GQ887153 |
| NeoMALA    | GQ887154 |
| NmeZYGEN   | GQ887155 |
| OimCOLL    | GQ887156 |
| PamNEOPT   | GQ887157 |
| PepONYCH   | GQ887158 |
| Pge2DIPLO  | GQ887159 |
| Pma2ARACH  | GQ887160 |
| Pol2DIPLO  | GQ887161 |
| PsaARCHEO  | GQ887162 |
| PwhARACH   | GQ887163 |
| ScolCHILO  | GQ887164 |
| Scu3SYMPH  | GQ887165 |
| SkleOST    | GQ887166 |
| SpoCHILO   | GQ887167 |
| StpARACH   | GQ887168 |
| Tom2COLL   | GQ887169 |
| UfsBRANCH  | GQ887170 |

44fin:

|            |          |
|------------|----------|
| AchARACH   | GQ887171 |
| AdoNEOPT   | GQ887172 |
| AeliPYCNO  | GQ887173 |
| AhiPYCNO   | GQ887174 |
| AmaDIPLO   | GQ887175 |
| Amb2ARACH  | GQ887176 |
| Asa3BRANCH | GQ887177 |
| Avu3MALA   | GQ887178 |
| BbaTHECOS  | GQ887179 |
| CfrTHECOS  | GQ887180 |
| ClizYGEN   | GQ887181 |
| Col2PYCNO  | GQ887182 |
| Cro2XIPHOS | GQ887183 |
| Crp2ARACH  | GQ887184 |
| Ctas2CHILO | GQ887185 |
| Din2ARACH  | GQ887186 |
| DmaBRANCH  | GQ887187 |
| EafCOPE    | GQ887188 |
| EinEPHEM   | GQ887189 |
| Han2SYMPH  | GQ887190 |
| HapaOST    | GQ887191 |
| HariARACH  | GQ887192 |
| HspARACH   | GQ887193 |
| IpumARACH  | GQ887194 |
| IveODONAT  | GQ887195 |
| JapDIPLUR  | GQ887196 |
| LemMALA    | GQ887197 |
| Lle2BRANCH | GQ887198 |
| LlyODONAT  | GQ887199 |
| LnigARACH  | GQ887200 |
| LoxTHECOS  | GQ887201 |
| LynBRANCH  | GQ887202 |
| MayEPHEM   | GQ887203 |
| MbaARCHEO  | GQ887204 |
| MtdTARD    | GQ887205 |
| NeoMALA    | GQ887206 |
| NmeZYGEN   | GQ887207 |
| PamNEOPT   | GQ887208 |
| PepONYCH   | GQ887209 |
| Pge2DIPLO  | GQ887210 |
| Pma2ARACH  | GQ887211 |
| Pol2DIPLO  | GQ887212 |
| PwhARACH   | GQ887213 |
| ScolCHILO  | GQ887214 |
| Scu3SYMPH  | GQ887215 |
| SkleOST    | GQ887216 |
| SpoCHILO   | GQ887217 |
| StpARACH   | GQ887218 |
| Tom2COLL   | GQ887219 |
| UfsBRANCH  | GQ887220 |

58fin3\_6:

|            |          |
|------------|----------|
| AarPENTA   | GQ887221 |
| AchARACH   | GQ887222 |
| AdoNEOPT   | GQ887223 |
| AeliPYCNO  | GQ887224 |
| AhiPYCNO   | GQ887225 |
| AmaDIPLO   | GQ887226 |
| Amb2ARACH  | GQ887227 |
| Avu3MALA   | GQ887228 |
| BbaTHECOS  | GQ887229 |
| CliZYGEN   | GQ887230 |
| Col2PYCNO  | GQ887231 |
| Crp2ARACH  | GQ887232 |
| Ctas2CHILO | GQ887233 |
| Din2ARACH  | GQ887234 |
| DmaBRANCH  | GQ887235 |
| DtyMYSTACO | GQ887236 |
| EafCOPE    | GQ887237 |
| EfrDIPLUR  | GQ887238 |
| EgigARACH  | GQ887239 |
| EinEPHEM   | GQ887240 |
| ElePYCNO   | GQ887241 |
| ErwONYCH   | GQ887242 |
| EuryPAURO  | GQ887243 |
| Han2SYMPH  | GQ887244 |
| HapaOST    | GQ887245 |
| HariARACH  | GQ887246 |
| HspARACH   | GQ887247 |
| IveODONAT  | GQ887248 |
| LeanTHECOS | GQ887249 |
| LemMALA    | GQ887250 |
| Lle2BRANCH | GQ887251 |
| LlyODONAT  | GQ887252 |
| LnigARACH  | GQ887253 |
| LoxTHECOS  | GQ887254 |
| LynBRANCH  | GQ887255 |
| MayEPHEM   | GQ887256 |
| MbaARCHEO  | GQ887257 |
| MtdTARD    | GQ887258 |
| NeoMALA    | GQ887259 |
| NmeZYGEN   | GQ887260 |
| PamNEOPT   | GQ887261 |
| Pge2DIPLO  | GQ887262 |
| Pma2ARACH  | GQ887263 |
| Pol2DIPLO  | GQ887264 |
| PsaARCHEO  | GQ887265 |
| PwhARACH   | GQ887266 |
| ScolCHILO  | GQ887267 |
| Scu3SYMPH  | GQ887268 |
| SkleOST    | GQ887269 |
| SpoCHILO   | GQ887270 |
| StpARACH   | GQ887271 |
| Tom2COLL   | GQ887272 |
| UfsBRANCH  | GQ887273 |



58fin7\_9:

|            |          |
|------------|----------|
| A369COPE   | GQ887274 |
| AchARACH   | GQ887275 |
| AdoNEOPT   | GQ887276 |
| AeliPYCNO  | GQ887277 |
| AhiPYCNO   | GQ887278 |
| AmaDIPLO   | GQ887279 |
| Amb2ARACH  | GQ887280 |
| Arg2BIURA  | GQ887281 |
| Avu3MALA   | GQ887282 |
| BbaTHECOS  | GQ887283 |
| CfrTHECOS  | GQ887284 |
| ClizYGEN   | GQ887285 |
| Col2PYCNO  | GQ887286 |
| Crp2ARACH  | GQ887287 |
| Ctas2CHILO | GQ887288 |
| Din2ARACH  | GQ887289 |
| DmaBRANCH  | GQ887290 |
| DtyMYSTACO | GQ887291 |
| EafCOPE    | GQ887292 |
| EinEPHEM   | GQ887293 |
| ElePYCNO   | GQ887294 |
| ErwONYCH   | GQ887295 |
| EuryPAURO  | GQ887296 |
| Han2SYMPH  | GQ887297 |
| HmaCEPHAL  | GQ887298 |
| IveODONAT  | GQ887299 |
| JapDIPLUR  | GQ887300 |
| LeanTHECOS | GQ887301 |
| LemMALA    | GQ887302 |
| Lle2BRANCH | GQ887303 |
| LlyODONAT  | GQ887304 |
| LnigARACH  | GQ887305 |
| LoxTHECOS  | GQ887306 |
| MayEPHEM   | GQ887307 |
| MbaARCHEO  | GQ887308 |
| NeoMALA    | GQ887309 |
| NmeZYGEN   | GQ887310 |
| OimCOLL    | GQ887311 |
| PamNEOPT   | GQ887312 |
| PepONYCH   | GQ887313 |
| Pge2DIPLO  | GQ887314 |
| Pno2ONYCH  | GQ887315 |
| Pol2DIPLO  | GQ887316 |
| PsaARCHEO  | GQ887317 |
| PwhARACH   | GQ887318 |
| ScolCHILO  | GQ887319 |
| Scu3SYMPH  | GQ887320 |
| SkleOST    | GQ887321 |
| SpoCHILO   | GQ887322 |
| StpARACH   | GQ887323 |
| Tom2COLL   | GQ887324 |
| UfsBRANCH  | GQ887325 |

62fin:

|            |          |
|------------|----------|
| A369COPE   | GQ887326 |
| AarPENTA   | GQ887327 |
| AchARACH   | GQ887328 |
| AeliPYCNO  | GQ887329 |
| AhiPYCNO   | GQ887330 |
| AmaDIPLO   | GQ887331 |
| Amb2ARACH  | GQ887332 |
| Arg2BIURA  | GQ887333 |
| Asa3BRANCH | GQ887334 |
| Avu3MALA   | GQ887335 |
| ClizYGEN   | GQ887336 |
| Col2PYCNO  | GQ887337 |
| Cro2XIPHOS | GQ887338 |
| Crp2ARACH  | GQ887339 |
| Ctas2CHILO | GQ887340 |
| Din2ARACH  | GQ887341 |
| DmaBRANCH  | GQ887342 |
| DtyMYSTACO | GQ887343 |
| EafCOPE    | GQ887344 |
| EgigARACH  | GQ887345 |
| EinEPHEM   | GQ887346 |
| ElePYCNO   | GQ887347 |
| ErwONYCH   | GQ887348 |
| EuryPAURO  | GQ887349 |
| Han2SYMPH  | GQ887350 |
| IpumARACH  | GQ887351 |
| IveODONAT  | GQ887352 |
| LemMALA    | GQ887353 |
| Lle2BRANCH | GQ887354 |
| LlyODONAT  | GQ887355 |
| LnigARACH  | GQ887356 |
| LynBRANCH  | GQ887357 |
| MayEPHEM   | GQ887358 |
| MbaARCHEO  | GQ887359 |
| MtdTARD    | GQ887360 |
| NeoMALA    | GQ887361 |
| NmeZYGEN   | GQ887362 |
| OimCOLL    | GQ887363 |
| PamNEOPT   | GQ887364 |
| PepONYCH   | GQ887365 |
| Pge2DIPLO  | GQ887366 |
| Pol2DIPLO  | GQ887367 |
| PsaARCHEO  | GQ887368 |
| PwhARACH   | GQ887369 |
| ScolCHILO  | GQ887370 |
| SkleOST    | GQ887371 |
| SpoCHILO   | GQ887372 |
| Tom2COLL   | GQ887373 |
| UfsBRANCH  | GQ887374 |

63fin:

|            |          |
|------------|----------|
| A369COPE   | GQ887375 |
| AarPENTA   | GQ887376 |
| AchARACH   | GQ887377 |
| AdoNEOPT   | GQ887378 |
| AeliPYCNO  | GQ887379 |
| AhiPYCNO   | GQ887380 |
| AmaDIPLO   | GQ887381 |
| Arg2BIURA  | GQ887382 |
| Asa3BRANCH | GQ887383 |
| Avu3MALA   | GQ887384 |
| BbaTHECOS  | GQ887385 |
| CfrTHECOS  | GQ887386 |
| ClizYGEN   | GQ887387 |
| Col2PYCNO  | GQ887388 |
| Cro2XIPHOS | GQ887389 |
| Crp2ARACH  | GQ887390 |
| Ctas2CHILO | GQ887391 |
| Din2ARACH  | GQ887392 |
| DmaBRANCH  | GQ887393 |
| DtyMYSTACO | GQ887394 |
| EafCOPE    | GQ887395 |
| EgigARACH  | GQ887396 |
| EinEPHEM   | GQ887397 |
| ElePYCNO   | GQ887398 |
| ErwONYCH   | GQ887399 |
| EuryPAURO  | GQ887400 |
| Han2SYMPH  | GQ887401 |
| HapaOST    | GQ887402 |
| HmaCEPHAL  | GQ887403 |
| IpumARACH  | GQ887404 |
| IveODONAT  | GQ887405 |
| JapDIPLUR  | GQ887406 |
| LeanTHECOS | GQ887407 |
| LemMALA    | GQ887408 |
| Lle2BRANCH | GQ887409 |
| LlyODONAT  | GQ887410 |
| LnigARACH  | GQ887411 |
| LoxTHECOS  | GQ887412 |
| LynBRANCH  | GQ887413 |
| MayEPHEM   | GQ887414 |
| MbaARCHEO  | GQ887415 |
| MtdTARD    | GQ887416 |
| NeoMALA    | GQ887417 |
| NmeZYGEN   | GQ887418 |
| OimCOLL    | GQ887419 |
| PamNEOPT   | GQ887420 |
| PepONYCH   | GQ887421 |
| Pge2DIPLO  | GQ887422 |
| Pma2ARACH  | GQ887423 |
| Pno2ONYCH  | GQ887424 |
| Pol2DIPLO  | GQ887425 |
| PsaARCHEO  | GQ887426 |
| PwhARACH   | GQ887427 |
| ScolCHILO  | GQ887428 |
| Scu3SYMPH  | GQ887429 |
| SpoCHILO   | GQ887430 |
| StpARACH   | GQ887431 |
| Tom2COLL   | GQ887432 |
| UfsBRANCH  | GQ887433 |

69fin:

|            |          |
|------------|----------|
| A369COPE   | GQ887434 |
| AarPENTA   | GQ887435 |
| AchARACH   | GQ887436 |
| AdoNEOPT   | GQ887437 |
| AeliPYCNO  | GQ887438 |
| AhiPYCNO   | GQ887439 |
| AmaDIPLO   | GQ887440 |
| Amb2ARACH  | GQ887441 |
| Arg2BIURA  | GQ887442 |
| Asa3BRANCH | GQ887443 |
| Avu3MALA   | GQ887444 |
| BbaTHECOS  | GQ887445 |
| CfrTHECOS  | GQ887446 |
| ClizYGEN   | GQ887447 |
| Col2PYCNO  | GQ887448 |
| Cro2XIPHOS | GQ887449 |
| Crp2ARACH  | GQ887450 |
| Ctas2CHILO | GQ887451 |
| Din2ARACH  | GQ887452 |
| DtyMYSTACO | GQ887453 |
| EafCOPE    | GQ887454 |
| EgigARACH  | GQ887455 |
| EinEPHEM   | GQ887456 |
| ElePYCNO   | GQ887457 |
| ErwONYCH   | GQ887458 |
| EuryPAURO  | GQ887459 |
| Han2SYMPH  | GQ887460 |
| HariARACH  | GQ887461 |
| HspARACH   | GQ887462 |
| IveODONAT  | GQ887463 |
| JapDIPLUR  | GQ887464 |
| LeanTHECOS | GQ887465 |
| LemMALA    | GQ887466 |
| Lle2BRANCH | GQ887467 |
| LlyODONAT  | GQ887468 |
| LnigARACH  | GQ887469 |
| LoxTHECOS  | GQ887470 |
| MayEPHEM   | GQ887471 |
| MtdTARD    | GQ887472 |
| NeoMALA    | GQ887473 |
| NmeZYGEM   | GQ887474 |
| OimCOLL    | GQ887475 |
| PamNEOPT   | GQ887476 |
| PepONYCH   | GQ887477 |
| Pge2DIPLO  | GQ887478 |
| Pma2ARACH  | GQ887479 |
| Pno2ONYCH  | GQ887480 |
| Pol2DIPLO  | GQ887481 |
| PsaARCHEO  | GQ887482 |
| ScolCHILO  | GQ887483 |
| Scu3SYMPH  | GQ887484 |
| SkleOST    | GQ887485 |
| SpoCHILO   | GQ887486 |
| StpARACH   | GQ887487 |
| Tom2COLL   | GQ887488 |
| UfsBRANCH  | GQ887489 |

73fin:

|            |          |
|------------|----------|
| A369COPE   | GQ887490 |
| AarPENTA   | GQ887491 |
| AchARACH   | GQ887492 |
| AdoNEOPT   | GQ887493 |
| AeliPYCNO  | GQ887494 |
| AhiPYCNO   | GQ887495 |
| AmaDIPLO   | GQ887496 |
| Amb2ARACH  | GQ887497 |
| Arg2BIURA  | GQ887498 |
| Asa3BRANCH | GQ887499 |
| Avu3MALA   | GQ887500 |
| BbaTHECOS  | GQ887501 |
| CfrTHECOS  | GQ887502 |
| ClizYGEN   | GQ887503 |
| Col2PYCNO  | GQ887504 |
| Cro2XIPHOS | GQ887505 |
| Crp2ARACH  | GQ887506 |
| Ctas2CHILO | GQ887507 |
| Din2ARACH  | GQ887508 |
| DmaBRANCH  | GQ887509 |
| EafCOPE    | GQ887510 |
| EgigARACH  | GQ887511 |
| EinEPHEM   | GQ887512 |
| ElePYCNO   | GQ887513 |
| ErwONYCH   | GQ887514 |
| EuryPAURO  | GQ887515 |
| Han2SYMPH  | GQ887516 |
| HariARACH  | GQ887517 |
| HspARACH   | GQ887518 |
| IpumARACH  | GQ887519 |
| IveODONAT  | GQ887520 |
| LemMALA    | GQ887521 |
| LlyODONAT  | GQ887522 |
| LnigARACH  | GQ887523 |
| LynBRANCH  | GQ887524 |
| MayEPHEM   | GQ887525 |
| MbaARCHEO  | GQ887526 |
| NeoMALA    | GQ887527 |
| NmeZYGEN   | GQ887528 |
| PamNEOPT   | GQ887529 |
| PepONYCH   | GQ887530 |
| Pge2DIPLO  | GQ887531 |
| Pma2ARACH  | GQ887532 |
| Pol2DIPLO  | GQ887533 |
| PsaARCHEO  | GQ887534 |
| PwhARACH   | GQ887535 |
| ScolCHILO  | GQ887536 |
| Scu3SYMPH  | GQ887537 |
| SkleOST    | GQ887538 |
| SpoCHILO   | GQ887539 |
| StpARACH   | GQ887540 |
| Tom2COLL   | GQ887541 |
| UfsBRANCH  | GQ887542 |

96fin:

|            |          |
|------------|----------|
| A369COPE   | GQ887543 |
| AarPENTA   | GQ887544 |
| AchARACH   | GQ887545 |
| AdoNEOPT   | GQ887546 |
| AhiPYCNO   | GQ887547 |
| AmaDIPLO   | GQ887548 |
| Amb2ARACH  | GQ887549 |
| Arg2BIURA  | GQ887550 |
| Asa3BRANCH | GQ887551 |
| Avu3MALA   | GQ887552 |
| BbaTHECOS  | GQ887553 |
| CfrTHECOS  | GQ887554 |
| ClizYGEN   | GQ887555 |
| Col2PYCNO  | GQ887556 |
| Crp2ARACH  | GQ887557 |
| Ctas2CHILO | GQ887558 |
| Din2ARACH  | GQ887559 |
| DmaBRANCH  | GQ887560 |
| EafCOPE    | GQ887561 |
| EfrDIPLUR  | GQ887562 |
| EgigARACH  | GQ887563 |
| EinEPHEM   | GQ887564 |
| ErwONYCH   | GQ887565 |
| EuryPAURO  | GQ887566 |
| Han2SYMPH  | GQ887567 |
| HapaOST    | GQ887568 |
| HariARACH  | GQ887569 |
| HmaCEPHAL  | GQ887570 |
| HspARACH   | GQ887571 |
| IveODONAT  | GQ887572 |
| JapDIPLUR  | GQ887573 |
| LeanTHECOS | GQ887574 |
| LemMALA    | GQ887575 |
| LlyODONAT  | GQ887576 |
| LnigARACH  | GQ887577 |
| LoxTHECOS  | GQ887578 |
| LynBRANCH  | GQ887579 |
| MayEPHEM   | GQ887580 |
| MbaARCHEO  | GQ887581 |
| MtdTARD    | GQ887582 |
| NeoMALA    | GQ887583 |
| NmeZYGEN   | GQ887584 |
| OimCOLL    | GQ887585 |
| PamNEOPT   | GQ887586 |
| PepONYCH   | GQ887587 |
| Pge2DIPLO  | GQ887588 |
| Pma2ARACH  | GQ887589 |
| Pno2ONYCH  | GQ887590 |
| PsaARCHEO  | GQ887591 |
| PwhARACH   | GQ887592 |
| ScolCHILO  | GQ887593 |
| Scu3SYMPH  | GQ887594 |
| StpARACH   | GQ887595 |
| Tom2COLL   | GQ887596 |
| UfsBRANCH  | GQ887597 |

109fin:

|            |          |
|------------|----------|
| AarPENTA   | GQ887598 |
| AchARACH   | GQ887599 |
| AdoNEOPT   | GQ887600 |
| AeliPYCNO  | GQ887601 |
| AmaDIPLO   | GQ887602 |
| Amb2ARACH  | GQ887603 |
| Arg2BIURA  | GQ887604 |
| Asa3BRANCH | GQ887605 |
| Avu3MALA   | GQ887606 |
| CliZYGEN   | GQ887607 |
| Col2PYCNO  | GQ887608 |
| Cro2XIPHOS | GQ887609 |
| Crp2ARACH  | GQ887610 |
| Ctas2CHILO | GQ887611 |
| Din2ARACH  | GQ887612 |
| DtyMYSTACO | GQ887613 |
| EafCOPE    | GQ887614 |
| EgigARACH  | GQ887615 |
| EinEPHEM   | GQ887616 |
| ElePYCNO   | GQ887617 |
| ErwONYCH   | GQ887618 |
| EuryPAURO  | GQ887619 |
| Han2SYMPH  | GQ887620 |
| HapaOST    | GQ887621 |
| HariARACH  | GQ887622 |
| HspARACH   | GQ887623 |
| IveODONAT  | GQ887624 |
| JapDIPLUR  | GQ887625 |
| LeanTHECOS | GQ887626 |
| LemMALA    | GQ887627 |
| Lle2BRANCH | GQ887628 |
| LnigARACH  | GQ887629 |
| LoxTHECOS  | GQ887630 |
| MayEPHEM   | GQ887631 |
| MbaARCHEO  | GQ887632 |
| MtdTARD    | GQ887633 |
| NeoMALA    | GQ887634 |
| OimCOLL    | GQ887635 |
| PamNEOPT   | GQ887636 |
| PepONYCH   | GQ887637 |
| Pge2DIPLO  | GQ887638 |
| Pma2ARACH  | GQ887639 |
| Pno2ONYCH  | GQ887640 |
| Pol2DIPLO  | GQ887641 |
| PsaARCHEO  | GQ887642 |
| PwhARACH   | GQ887643 |
| ScolCHILO  | GQ887644 |
| Scu3SYMPH  | GQ887645 |
| SpoCHILO   | GQ887646 |
| StpARACH   | GQ887647 |
| Tom2COLL   | GQ887648 |
| UfsBRANCH  | GQ887649 |

113fin:

|            |          |
|------------|----------|
| A369COPE   | GQ887650 |
| AarPENTA   | GQ887651 |
| AchARACH   | GQ887652 |
| AdoNEOPT   | GQ887653 |
| AeliPYCNO  | GQ887654 |
| AmaDIPLO   | GQ887655 |
| Arg2BIURA  | GQ887656 |
| Avu3MALA   | GQ887657 |
| BbaTHECOS  | GQ887658 |
| CfrTHECOS  | GQ887659 |
| ClizYGEN   | GQ887660 |
| Col2PYCNO  | GQ887661 |
| Cro2XIPHOS | GQ887662 |
| Crp2ARACH  | GQ887663 |
| Ctas2CHILO | GQ887664 |
| Din2ARACH  | GQ887665 |
| DmaBRANCH  | GQ887666 |
| DtyMYSTACO | GQ887667 |
| EafCOPE    | GQ887668 |
| EfrDIPLUR  | GQ887669 |
| EinEPHEM   | GQ887670 |
| ElePYCNO   | GQ887671 |
| ErwONYCH   | GQ887672 |
| EuryPAURO  | GQ887673 |
| Han2SYMPH  | GQ887674 |
| HariARACH  | GQ887675 |
| HspARACH   | GQ887676 |
| IpumARACH  | GQ887677 |
| IveODONAT  | GQ887678 |
| JapDIPLUR  | GQ887679 |
| LeanTHECOS | GQ887680 |
| LemMALA    | GQ887681 |
| Lle2BRANCH | GQ887682 |
| LlyODONAT  | GQ887683 |
| LnigARACH  | GQ887684 |
| LoxTHECOS  | GQ887685 |
| LynBRANCH  | GQ887686 |
| MbaARCHEO  | GQ887687 |
| MtdTARD    | GQ887688 |
| NeoMALA    | GQ887689 |
| NmeZYGEN   | GQ887690 |
| OimCOLL    | GQ887691 |
| PamNEOPT   | GQ887692 |
| PepONYCH   | GQ887693 |
| Pge2DIPLO  | GQ887694 |
| Pma2ARACH  | GQ887695 |
| PsaARCHEO  | GQ887696 |
| PwhARACH   | GQ887697 |
| ScolCHILO  | GQ887698 |
| Scu3SYMPH  | GQ887699 |
| SkleOST    | GQ887700 |
| SpoCHILO   | GQ887701 |
| StpARACH   | GQ887702 |
| UfsBRANCH  | GQ887703 |



127fin:

|            |          |
|------------|----------|
| AchARACH   | GQ887704 |
| AdoNEOPT   | GQ887705 |
| AeliPYCNO  | GQ887706 |
| AhiPYCNO   | GQ887707 |
| AmaDIPLO   | GQ887708 |
| Amb2ARACH  | GQ887709 |
| Arg2BIURA  | GQ887710 |
| Asa3BRANCH | GQ887711 |
| Avu3MALA   | GQ887712 |
| BbaTHECOS  | GQ887713 |
| ClizYGEN   | GQ887714 |
| Col2PYCNO  | GQ887715 |
| Cro2XIPHOS | GQ887716 |
| Crp2ARACH  | GQ887717 |
| DmaBRANCH  | GQ887718 |
| EfrDIPLUR  | GQ887719 |
| EgigARACH  | GQ887720 |
| EinEPHEM   | GQ887721 |
| ElePYCNO   | GQ887722 |
| ErwONYCH   | GQ887723 |
| EuryPAURO  | GQ887724 |
| Han2SYMPH  | GQ887725 |
| HariARACH  | GQ887726 |
| HspARACH   | GQ887727 |
| IveODONAT  | GQ887728 |
| JapDIPLUR  | GQ887729 |
| Lle2BRANCH | GQ887730 |
| LlyODONAT  | GQ887731 |
| LnigARACH  | GQ887732 |
| LoxTHECOS  | GQ887733 |
| LynBRANCH  | GQ887734 |
| MayEPHEM   | GQ887735 |
| MbaARCHEO  | GQ887736 |
| MtdTARD    | GQ887737 |
| NeoMALA    | GQ887738 |
| NmeZYGEN   | GQ887739 |
| OimCOLL    | GQ887740 |
| PamNEOPT   | GQ887741 |
| PepONYCH   | GQ887742 |
| Pge2DIPLO  | GQ887743 |
| Pma2ARACH  | GQ887744 |
| Pol2DIPLO  | GQ887745 |
| PsaARCHEO  | GQ887746 |
| ScolCHILO  | GQ887747 |
| Scu3SYMPH  | GQ887748 |
| Tom2COLL   | GQ887749 |
| UfsBRANCH  | GQ887750 |

149fin:

|            |          |
|------------|----------|
| A369COPE   | GQ887751 |
| AarPENTA   | GQ887752 |
| AchARACH   | GQ887753 |
| AdoNEOPT   | GQ887754 |
| AeliPYCNO  | GQ887755 |
| AhiPYCNO   | GQ887756 |
| AmaDIPLO   | GQ887757 |
| Amb2ARACH  | GQ887758 |
| Arg2BIURA  | GQ887759 |
| Asa3BRANCH | GQ887760 |
| Avu3MALA   | GQ887761 |
| BbaTHECOS  | GQ887762 |
| CfrTHECOS  | GQ887763 |
| ClizYGEN   | GQ887764 |
| Col2PYCNO  | GQ887765 |
| Cro2XIPHOS | GQ887766 |
| Crp2ARACH  | GQ887767 |
| Ctas2CHILO | GQ887768 |
| Din2ARACH  | GQ887769 |
| DmaBRANCH  | GQ887770 |
| DtyMYSTACO | GQ887771 |
| EafCOPE    | GQ887772 |
| EfrDIPLUR  | GQ887773 |
| EgigARACH  | GQ887774 |
| ElePYCNO   | GQ887775 |
| EuryPAURO  | GQ887776 |
| Han2SYMPH  | GQ887777 |
| HariARACH  | GQ887778 |
| HspARACH   | GQ887779 |
| IpumARACH  | GQ887780 |
| IveODONAT  | GQ887781 |
| LeanTHECOS | GQ887782 |
| LemMALA    | GQ887783 |
| Lle2BRANCH | GQ887784 |
| LlyODONAT  | GQ887785 |
| LnigARACH  | GQ887786 |
| LoxTHECOS  | GQ887787 |
| LynBRANCH  | GQ887788 |
| MayEPHEM   | GQ887789 |
| MbaARCHEO  | GQ887790 |
| NeoMALA    | GQ887791 |
| NmeZYGEN   | GQ887792 |
| OimCOLL    | GQ887793 |
| PamNEOPT   | GQ887794 |
| Pma2ARACH  | GQ887795 |
| Pol2DIPLO  | GQ887796 |
| PsaARCHEO  | GQ887797 |
| PwhARACH   | GQ887798 |
| Scu3SYMPH  | GQ887799 |
| SkleOST    | GQ887800 |
| SpoCHILO   | GQ887801 |
| StpARACH   | GQ887802 |
| Tom2COLL   | GQ887803 |
| UfsBRANCH  | GQ887804 |

166fin:

|            |          |
|------------|----------|
| A369COPE   | GQ887805 |
| AarPENTA   | GQ887806 |
| AchARACH   | GQ887807 |
| AdoNEOPT   | GQ887808 |
| AeliPYCNO  | GQ887809 |
| AhiPYCNO   | GQ887810 |
| AmaDIPLO   | GQ887811 |
| Amb2ARACH  | GQ887812 |
| Arg2BIURA  | GQ887813 |
| Asa3BRANCH | GQ887814 |
| Avu3MALA   | GQ887815 |
| BbaTHECOS  | GQ887816 |
| CfrTHECOS  | GQ887817 |
| ClizYGEN   | GQ887818 |
| Col2PYCNO  | GQ887819 |
| Cro2XIPHOS | GQ887820 |
| Crp2ARACH  | GQ887821 |
| Ctas2CHILO | GQ887822 |
| Din2ARACH  | GQ887823 |
| DmaBRANCH  | GQ887824 |
| DtyMYSTACO | GQ887825 |
| EafCOPE    | GQ887826 |
| EfrDIPLUR  | GQ887827 |
| EgigARACH  | GQ887828 |
| EinEPHEM   | GQ887829 |
| ElePYCNO   | GQ887830 |
| ErwONYCH   | GQ887831 |
| EuryPAURO  | GQ887832 |
| Han2SYMPH  | GQ887833 |
| HapaOST    | GQ887834 |
| HariARACH  | GQ887835 |

|            |          |
|------------|----------|
| HmaCEPHAL  | GQ887836 |
| HspARACH   | GQ887837 |
| IpumARACH  | GQ887838 |
| IveODONAT  | GQ887839 |
| JapDIPLUR  | GQ887840 |
| LeanTHECOS | GQ887841 |
| LemMALA    | GQ887842 |
| Lle2BRANCH | GQ887843 |
| LlyODONAT  | GQ887844 |
| LnigARACH  | GQ887845 |
| LoxTHECOS  | GQ887846 |
| LynBRANCH  | GQ887847 |
| MayEPHEM   | GQ887848 |
| MbaARCHEO  | GQ887849 |
| MtdTARD    | GQ887850 |
| NeoMALA    | GQ887851 |
| NmeZYGEN   | GQ887852 |
| OimCOLL    | GQ887853 |
| PamNEOPT   | GQ887854 |
| PepONYCH   | GQ887855 |
| Pge2DIPLO  | GQ887856 |
| Pma2ARACH  | GQ887857 |
| Pno2ONYCH  | GQ887858 |
| Pol2DIPLO  | GQ887859 |
| PwhARACH   | GQ887860 |
| ScolCHILO  | GQ887861 |
| Scu3SYMPH  | GQ887862 |
| SkleOST    | GQ887863 |
| SpoCHILO   | GQ887864 |
| StpARACH   | GQ887865 |
| Tom2COLL   | GQ887866 |
| UfsBRANCH  | GQ887867 |

192fin:

|            |          |
|------------|----------|
| AchARACH   | GQ887868 |
| AeliPYCNO  | GQ887869 |
| AhiPYCNO   | GQ887870 |
| Amb2ARACH  | GQ887871 |
| Arg2BIURA  | GQ887872 |
| Asa3BRANCH | GQ887873 |
| BbaTHECOS  | GQ887874 |
| CfrTHECOS  | GQ887875 |
| ClizYGEN   | GQ887876 |
| Cro2XIPHOS | GQ887877 |
| Crp2ARACH  | GQ887878 |
| Ctas2CHILO | GQ887879 |
| Din2ARACH  | GQ887880 |
| DmaBRANCH  | GQ887881 |
| DtyMYSTACO | GQ887882 |
| EafCOPE    | GQ887883 |
| EfrDIPLUR  | GQ887884 |
| EgigARACH  | GQ887885 |
| EinEPHEM   | GQ887886 |
| ElePYCNO   | GQ887887 |
| ErwONYCH   | GQ887888 |
| EuryPAURO  | GQ887889 |
| Han2SYMPH  | GQ887890 |
| HapaOST    | GQ887891 |
| HariARACH  | GQ887892 |
| HspARACH   | GQ887893 |
| IpumARACH  | GQ887894 |
| JapDIPLUR  | GQ887895 |
| LemMALA    | GQ887896 |
| Lle2BRANCH | GQ887897 |
| LnigARACH  | GQ887898 |
| LoxTHECOS  | GQ887899 |
| LynBRANCH  | GQ887900 |
| MayEPHEM   | GQ887901 |
| MbaARCHEO  | GQ887902 |
| NeoMALA    | GQ887903 |
| NmeZYGEN   | GQ887904 |
| PamNEOPT   | GQ887905 |
| PepONYCH   | GQ887906 |
| Pge2DIPLO  | GQ887907 |
| Pma2ARACH  | GQ887908 |
| Pol2DIPLO  | GQ887909 |
| PsaARCHEO  | GQ887910 |
| PwhARACH   | GQ887911 |
| ScolCHILO  | GQ887912 |
| Scu3SYMPH  | GQ887913 |
| SkleOST    | GQ887914 |
| SpoCHILO   | GQ887915 |
| StpARACH   | GQ887916 |
| Tom2COLL   | GQ887917 |
| UfsBRANCH  | GQ887918 |

197fin:

|            |          |
|------------|----------|
| A369COPE   | GQ887919 |
| AarPENTA   | GQ887920 |
| AchARACH   | GQ887921 |
| AdoNEOPT   | GQ887922 |
| AeliPYCNO  | GQ887923 |
| AhiPYCNO   | GQ887924 |
| Amb2ARACH  | GQ887925 |
| Arg2BIURA  | GQ887926 |
| Avu3MALA   | GQ887927 |
| BbaTHECOS  | GQ887928 |
| ClizYGEN   | GQ887929 |
| Col2PYCNO  | GQ887930 |
| Cro2XIPHOS | GQ887931 |
| Crp2ARACH  | GQ887932 |
| Ctas2CHILO | GQ887933 |
| Din2ARACH  | GQ887934 |
| DmaBRANCH  | GQ887935 |
| EafCOPE    | GQ887936 |
| EfrDIPLUR  | GQ887937 |
| EgigARACH  | GQ887938 |
| EinEPHEM   | GQ887939 |
| ErwONYCH   | GQ887940 |
| EuryPAURO  | GQ887941 |
| Han2SYMPH  | GQ887942 |
| HariARACH  | GQ887943 |
| HmaCEPHAL  | GQ887944 |
| HspARACH   | GQ887945 |
| IveODONAT  | GQ887946 |
| JapDIPLUR  | GQ887947 |
| LeanTHECOS | GQ887948 |
| LemMALA    | GQ887949 |
| Lle2BRANCH | GQ887950 |
| LlyODONAT  | GQ887951 |
| LnigARACH  | GQ887952 |
| LynBRANCH  | GQ887953 |
| MayEPHEM   | GQ887954 |
| MbaARCHEO  | GQ887955 |
| NeoMALA    | GQ887956 |
| NmeZYGEN   | GQ887957 |
| OimCOLL    | GQ887958 |
| PepONYCH   | GQ887959 |
| Pge2DIPLO  | GQ887960 |
| Pma2ARACH  | GQ887961 |
| Pol2DIPLO  | GQ887962 |
| PsaARCHEO  | GQ887963 |
| ScolCHILO  | GQ887964 |
| Scu3SYMPH  | GQ887965 |
| SpoCHILO   | GQ887966 |
| StpARACH   | GQ887967 |

220fin:

|            |          |
|------------|----------|
| AchARACH   | GQ887968 |
| AdoNEOPT   | GQ887969 |
| AeliPYCNO  | GQ887970 |
| AhiPYCNO   | GQ887971 |
| AmaDIPLO   | GQ887972 |
| Amb2ARACH  | GQ887973 |
| Arg2BIURA  | GQ887974 |
| Asa3BRANCH | GQ887975 |
| Avu3MALA   | GQ887976 |
| BbaTHECOS  | GQ887977 |
| CfrTHECOS  | GQ887978 |
| Col2PYCNO  | GQ887979 |
| Crp2ARACH  | GQ887980 |
| Ctas2CHILO | GQ887981 |
| Din2ARACH  | GQ887982 |
| DmaBRANCH  | GQ887983 |
| DtyMYSTACO | GQ887984 |
| EfrDIPLUR  | GQ887985 |
| EgigARACH  | GQ887986 |
| EinEPHEM   | GQ887987 |
| ElePYCNO   | GQ887988 |
| ErwONYCH   | GQ887989 |
| EuryPAURO  | GQ887990 |
| Han2SYMPH  | GQ887991 |
| HariARACH  | GQ887992 |
| HspARACH   | GQ887993 |
| IveODONAT  | GQ887994 |
| LeanTHECOS | GQ887995 |
| LemMALA    | GQ887996 |
| Lle2BRANCH | GQ887997 |
| LlyODONAT  | GQ887998 |
| LnigARACH  | GQ887999 |
| MayEPHEM   | GQ888000 |
| MbaARCHEO  | GQ888001 |
| NeoMALA    | GQ888002 |
| NmeZYGEM   | GQ888003 |
| OimCOLL    | GQ888004 |
| PamNEOPT   | GQ888005 |
| PepONYCH   | GQ888006 |
| Pge2DIPLO  | GQ888007 |
| Pma2ARACH  | GQ888008 |
| Pol2DIPLO  | GQ888009 |
| PsaARCHEO  | GQ888010 |
| PwhARACH   | GQ888011 |
| ScolCHILO  | GQ888012 |
| Scu3SYMPH  | GQ888013 |
| SpoCHILO   | GQ888014 |
| StpARACH   | GQ888015 |
| Tom2COLL   | GQ888016 |
| UfsBRANCH  | GQ888017 |

226fin:

|            |          |
|------------|----------|
| A369COPE   | GQ888018 |
| AarPENTA   | GQ888019 |
| AchARACH   | GQ888020 |
| AeliPYCNO  | GQ888021 |
| AhiPYCNO   | GQ888022 |
| AmaDIPLO   | GQ888023 |
| Amb2ARACH  | GQ888024 |
| Arg2BIURA  | GQ888025 |
| Asa3BRANCH | GQ888026 |
| Avu3MALA   | GQ888027 |
| BbaTHECOS  | GQ888028 |
| ClizYGEN   | GQ888029 |
| Col2PYCNO  | GQ888030 |
| Cro2XIPHOS | GQ888031 |
| Crp2ARACH  | GQ888032 |
| Ctas2CHILO | GQ888033 |
| Din2ARACH  | GQ888034 |
| DmaBRANCH  | GQ888035 |
| DtyMYSTACO | GQ888036 |
| EafCOPE    | GQ888037 |
| EfrDIPLUR  | GQ888038 |
| EgigARACH  | GQ888039 |
| EinEPHEM   | GQ888040 |
| ElePYCNO   | GQ888041 |
| ErwONYCH   | GQ888042 |
| EuryPAURO  | GQ888043 |
| Han2SYMPH  | GQ888044 |
| HariARACH  | GQ888045 |
| HspARACH   | GQ888046 |
| IpumARACH  | GQ888047 |
| IveODONAT  | GQ888048 |
| JapDIPLUR  | GQ888049 |
| LeanTHECOS | GQ888050 |
| LemMALA    | GQ888051 |
| Lle2BRANCH | GQ888052 |
| LlyODONAT  | GQ888053 |
| LnigARACH  | GQ888054 |
| LoxTHECOS  | GQ888055 |
| LynBRANCH  | GQ888056 |
| MayEPHEM   | GQ888057 |
| MbaARCHEO  | GQ888058 |
| MtdTARD    | GQ888059 |
| NeoMALA    | GQ888060 |
| NmeZYGEN   | GQ888061 |
| OimCOLL    | GQ888062 |
| PamNEOPT   | GQ888063 |
| PepONYCH   | GQ888064 |
| Pge2DIPLO  | GQ888065 |
| Pma2ARACH  | GQ888066 |
| Pol2DIPLO  | GQ888067 |
| PsaARCHEO  | GQ888068 |
| PwhARACH   | GQ888069 |
| ScolCHILO  | GQ888070 |
| Scu3SYMPH  | GQ888071 |
| SkleOST    | GQ888072 |
| SpoCHILO   | GQ888073 |
| StpARACH   | GQ888074 |
| Tom2COLL   | GQ888075 |
| UfsBRANCH  | GQ888076 |

247fin:

|            |          |
|------------|----------|
| A369COPE   | GQ888077 |
| AchARACH   | GQ888078 |
| AdoNEOPT   | GQ888079 |
| AeliPYCNO  | GQ888080 |
| AhiPYCNO   | GQ888081 |
| AmaDIPLO   | GQ888082 |
| Asa3BRANCH | GQ888083 |
| Avu3MALA   | GQ888084 |
| CfrTHECOS  | GQ888085 |
| CliZYGEN   | GQ888086 |
| Ctas2CHILO | GQ888087 |
| Din2ARACH  | GQ888088 |
| DmaBRANCH  | GQ888089 |
| EafCOPE    | GQ888090 |
| EfrDIPLUR  | GQ888091 |
| EinEPHEM   | GQ888092 |
| ElePYCNO   | GQ888093 |
| ErwONYCH   | GQ888094 |
| EuryPAURO  | GQ888095 |
| Han2SYMPH  | GQ888096 |
| HariARACH  | GQ888097 |
| HmaCEPHAL  | GQ888098 |
| HspARACH   | GQ888099 |
| IpumARACH  | GQ888100 |
| IveODONAT  | GQ888101 |
| JapDIPLUR  | GQ888102 |
| LeanTHECOS | GQ888103 |
| LlyODONAT  | GQ888104 |
| LnigARACH  | GQ888105 |
| LoxTHECOS  | GQ888106 |
| MayEPHEM   | GQ888107 |
| NeoMALA    | GQ888108 |
| NmeZYGEN   | GQ888109 |
| OimCOLL    | GQ888110 |
| PamNEOPT   | GQ888111 |
| PepONYCH   | GQ888112 |
| Pma2ARACH  | GQ888113 |
| Pol2DIPLO  | GQ888114 |
| PsaARCHEO  | GQ888115 |
| PwhARACH   | GQ888116 |
| ScolCHILO  | GQ888117 |
| Scu3SYMPH  | GQ888118 |
| SpoCHILO   | GQ888119 |
| Tom2COLL   | GQ888120 |
| UfsBRANCH  | GQ888121 |



262fin:

|            |          |
|------------|----------|
| A369COPE   | GQ888122 |
| AarPENTA   | GQ888123 |
| AchARACH   | GQ888124 |
| AdoNEOPT   | GQ888125 |
| AeliPYCNO  | GQ888126 |
| AhiPYCNO   | GQ888127 |
| AmaDIPLO   | GQ888128 |
| Arg2BIURA  | GQ888129 |
| Asa3BRANCH | GQ888130 |
| Avu3MALA   | GQ888131 |
| CfrTHECOS  | GQ888132 |
| ClizYGEN   | GQ888133 |
| Col2PYCNO  | GQ888134 |
| Cro2XIPHOS | GQ888135 |
| Crp2ARACH  | GQ888136 |
| Din2ARACH  | GQ888137 |
| DmaBRANCH  | GQ888138 |
| DtyMYSTACO | GQ888139 |
| EafCOPE    | GQ888140 |
| EgigARACH  | GQ888141 |
| EinEPHEM   | GQ888142 |
| ElePYCNO   | GQ888143 |
| ErwONYCH   | GQ888144 |
| EuryPAURO  | GQ888145 |
| Han2SYMPH  | GQ888146 |
| HariARACH  | GQ888147 |
| HmaCEPHAL  | GQ888148 |
| HspARACH   | GQ888149 |
| IpumARACH  | GQ888150 |
| IveODONAT  | GQ888151 |
| JapDIPLUR  | GQ888152 |
| LeanTHECOS | GQ888153 |
| LemMALA    | GQ888154 |
| Lle2BRANCH | GQ888155 |
| LlyODONAT  | GQ888156 |
| LnigARACH  | GQ888157 |
| LoxTHECOS  | GQ888158 |
| LynBRANCH  | GQ888159 |
| MbaARCHEO  | GQ888160 |
| NeoMALA    | GQ888161 |
| NmeZYGEM   | GQ888162 |
| OimCOLL    | GQ888163 |
| PamNEOPT   | GQ888164 |
| PepONYCH   | GQ888165 |
| Pge2DIPLO  | GQ888166 |
| Pma2ARACH  | GQ888167 |
| Pno2ONYCH  | GQ888168 |
| Pol2DIPLO  | GQ888169 |
| PsaARCHEO  | GQ888170 |
| PwhARACH   | GQ888171 |
| ScolCHILO  | GQ888172 |
| Scu3SYMPH  | GQ888173 |
| SkleOST    | GQ888174 |
| SpoCHILO   | GQ888175 |
| StpARACH   | GQ888176 |
| Tom2COLL   | GQ888177 |
| UfsBRANCH  | GQ888178 |

265fin:

|            |          |
|------------|----------|
| A369COPE   | GQ888179 |
| AeliPYCNO  | GQ888180 |
| AhiPYCNO   | GQ888181 |
| AmaDIPLO   | GQ888182 |
| Arg2BIURA  | GQ888183 |
| Asa3BRANCH | GQ888184 |
| Avu3MALA   | GQ888185 |
| BbaTHECOS  | GQ888186 |
| ClizYGEN   | GQ888187 |
| Crp2ARACH  | GQ888188 |
| Ctas2CHILO | GQ888189 |
| Din2ARACH  | GQ888190 |
| DmaBRANCH  | GQ888191 |
| EafCOPE    | GQ888192 |
| EfrDIPLUR  | GQ888193 |
| EgigARACH  | GQ888194 |
| EinEPHEM   | GQ888195 |
| ErwONYCH   | GQ888196 |
| EuryPAURO  | GQ888197 |
| Han2SYMPH  | GQ888198 |
| HariARACH  | GQ888199 |
| HmaCEPHAL  | GQ888200 |
| HspARACH   | GQ888201 |
| IveODONAT  | GQ888202 |
| JapDIPLUR  | GQ888203 |
| LeanTHECOS | GQ888204 |
| LemMALA    | GQ888205 |
| LlyODONAT  | GQ888206 |
| LnigARACH  | GQ888207 |
| LoxTHECOS  | GQ888208 |
| LynBRANCH  | GQ888209 |
| MayEPHEM   | GQ888210 |
| MbaARCHEO  | GQ888211 |
| MtdTARD    | GQ888212 |
| NeoMALA    | GQ888213 |
| NmeZYGEN   | GQ888214 |
| OimCOLL    | GQ888215 |
| PamNEOPT   | GQ888216 |
| PepONYCH   | GQ888217 |
| Pge2DIPLO  | GQ888218 |
| Pma2ARACH  | GQ888219 |
| Pno2ONYCH  | GQ888220 |
| Pol2DIPLO  | GQ888221 |
| PsaARCHEO  | GQ888222 |
| PwhARACH   | GQ888223 |
| Scu3SYMPH  | GQ888224 |
| SkleOST    | GQ888225 |
| StpARACH   | GQ888226 |
| Tom2COLL   | GQ888227 |

267fin:

|            |          |
|------------|----------|
| A369COPE   | GQ888228 |
| AchARACH   | GQ888229 |
| AdoNEOPT   | GQ888230 |
| AeliPYCNO  | GQ888231 |
| AhiPYCNO   | GQ888232 |
| AmaDIPLO   | GQ888233 |
| Amb2ARACH  | GQ888234 |
| Arg2BIURA  | GQ888235 |
| Asa3BRANCH | GQ888236 |
| Avu3MALA   | GQ888237 |
| BbaTHECOS  | GQ888238 |
| CfrTHECOS  | GQ888239 |
| ClizYGEN   | GQ888240 |
| Col2PYCNO  | GQ888241 |
| Cro2XIPHOS | GQ888242 |
| Crp2ARACH  | GQ888243 |
| Ctas2CHILO | GQ888244 |
| Din2ARACH  | GQ888245 |
| DmaBRANCH  | GQ888246 |
| EafCOPE    | GQ888247 |
| EfrDIPLUR  | GQ888248 |
| EgigARACH  | GQ888249 |
| EinEPHEM   | GQ888250 |
| ElePYCNO   | GQ888251 |
| ErwONYCH   | GQ888252 |
| EuryPAURO  | GQ888253 |
| Han2SYMPH  | GQ888254 |
| HmaCEPHAL  | GQ888255 |
| HspARACH   | GQ888256 |
| IpumARACH  | GQ888257 |
| IveODONAT  | GQ888258 |
| JapDIPLUR  | GQ888259 |
| LeanTHECOS | GQ888260 |
| LemMALA    | GQ888261 |
| Lle2BRANCH | GQ888262 |
| LnigARACH  | GQ888263 |
| LoxTHECOS  | GQ888264 |
| LynBRANCH  | GQ888265 |
| MayEPHEM   | GQ888266 |
| MbaARCHEO  | GQ888267 |
| MtdTARD    | GQ888268 |
| NeoMALA    | GQ888269 |
| NmeZYGEN   | GQ888270 |
| OimCOLL    | GQ888271 |
| PamNEOPT   | GQ888272 |
| PepONYCH   | GQ888273 |
| Pge2DIPLO  | GQ888274 |
| Pma2ARACH  | GQ888275 |
| Pno2ONYCH  | GQ888276 |
| Pol2DIPLO  | GQ888277 |
| PsaARCHEO  | GQ888278 |
| PwhARACH   | GQ888279 |
| ScolCHILO  | GQ888280 |
| Scu3SYMPH  | GQ888281 |
| SkleOST    | GQ888282 |
| SpoCHILO   | GQ888283 |
| StpARACH   | GQ888284 |
| Tom2COLL   | GQ888285 |
| UfsBRANCH  | GQ888286 |

268fin:

|            |          |
|------------|----------|
| A369COPE   | GQ888287 |
| AdoNEOPT   | GQ888288 |
| AeliPYCNO  | GQ888289 |
| AhiPYCNO   | GQ888290 |
| AmaDIPLO   | GQ888291 |
| Amb2ARACH  | GQ888292 |
| Arg2BIURA  | GQ888293 |
| Col2PYCNO  | GQ888294 |
| Cro2XIPHOS | GQ888295 |
| Crp2ARACH  | GQ888296 |
| Ctas2CHILO | GQ888297 |
| Din2ARACH  | GQ888298 |
| DmaBRANCH  | GQ888299 |
| EafCOPE    | GQ888300 |
| EgigARACH  | GQ888301 |
| EinEPHEM   | GQ888302 |
| ErwONYCH   | GQ888303 |
| Han2SYMPH  | GQ888304 |
| IpumARACH  | GQ888305 |
| IveODONAT  | GQ888306 |
| Lle2BRANCH | GQ888307 |
| LlyODONAT  | GQ888308 |
| LnigARACH  | GQ888309 |
| LoxTHECOS  | GQ888310 |
| LynBRANCH  | GQ888311 |
| MayEPHEM   | GQ888312 |
| MbaARCHEO  | GQ888313 |
| NmeZYGEN   | GQ888314 |
| OimCOLL    | GQ888315 |
| PamNEOPT   | GQ888316 |
| PepONYCH   | GQ888317 |
| Pge2DIPLO  | GQ888318 |
| Pol2DIPLO  | GQ888319 |
| PsaARCHEO  | GQ888320 |
| PwhARACH   | GQ888321 |
| ScolCHILO  | GQ888322 |
| Scu3SYMPH  | GQ888323 |
| SkleOST    | GQ888324 |
| StpARACH   | GQ888325 |
| Tom2COLL   | GQ888326 |
| UfsBRANCH  | GQ888327 |

270fin:

|            |          |
|------------|----------|
| AchARACH   | GQ888328 |
| AdoNEOPT   | GQ888329 |
| Amb2ARACH  | GQ888330 |
| Avu3MALA   | GQ888331 |
| BbaTHECOS  | GQ888332 |
| CfrTHECOS  | GQ888333 |
| ClizYGEN   | GQ888334 |
| Col2PYCNO  | GQ888335 |
| Cro2XIPHOS | GQ888336 |
| Crp2ARACH  | GQ888337 |
| Ctas2CHILO | GQ888338 |
| Din2ARACH  | GQ888339 |
| DmaBRANCH  | GQ888340 |
| DtyMYSTACO | GQ888341 |
| EafCOPE    | GQ888342 |
| EgigARACH  | GQ888343 |
| ElePYCNO   | GQ888344 |
| ErwONYCH   | GQ888345 |
| Han2SYMPH  | GQ888346 |
| HariARACH  | GQ888347 |
| HspARACH   | GQ888348 |
| IveODONAT  | GQ888349 |
| JapDIPLUR  | GQ888350 |
| LeanTHECOS | GQ888351 |
| LemMALA    | GQ888352 |
| LlyODONAT  | GQ888353 |
| LnigARACH  | GQ888354 |
| LoxTHECOS  | GQ888355 |
| LynBRANCH  | GQ888356 |
| MayEPHEM   | GQ888357 |
| MbaARCHEO  | GQ888358 |
| NeoMALA    | GQ888359 |
| NmeZYGEN   | GQ888360 |
| OimCOLL    | GQ888361 |
| PamNEOPT   | GQ888362 |
| Pma2ARACH  | GQ888363 |
| PsaARCHEO  | GQ888364 |
| ScolCHILO  | GQ888365 |
| SkleOST    | GQ888366 |
| SpoCHILO   | GQ888367 |
| StpARACH   | GQ888368 |
| Tom2COLL   | GQ888369 |

274fin:

|            |          |
|------------|----------|
| A369COPE   | GQ888370 |
| AarPENTA   | GQ888371 |
| AchARACH   | GQ888372 |
| AdoNEOPT   | GQ888373 |
| AmaDIPLO   | GQ888374 |
| Amb2ARACH  | GQ888375 |
| Arg2BIURA  | GQ888376 |
| Asa3BRANCH | GQ888377 |
| BbaTHECOS  | GQ888378 |
| CfrTHECOS  | GQ888379 |
| Crp2ARACH  | GQ888380 |
| Ctas2CHILO | GQ888381 |
| Din2ARACH  | GQ888382 |
| DmaBRANCH  | GQ888383 |
| DtyMYSTACO | GQ888384 |
| EinEPHEM   | GQ888385 |
| EuryPAURO  | GQ888386 |
| Han2SYMPH  | GQ888387 |
| HmaCEPHAL  | GQ888388 |
| HspARACH   | GQ888389 |
| IveODONAT  | GQ888390 |
| LeanTHECOS | GQ888391 |
| LemMALA    | GQ888392 |
| Lle2BRANCH | GQ888393 |
| LlyODONAT  | GQ888394 |
| LoxTHECOS  | GQ888395 |
| LynBRANCH  | GQ888396 |
| MayEPHEM   | GQ888397 |
| PamNEOPT   | GQ888398 |
| PepONYCH   | GQ888399 |
| Pge2DIPLO  | GQ888400 |
| Pol2DIPLO  | GQ888401 |
| PwhARACH   | GQ888402 |
| ScolCHILO  | GQ888403 |
| Scu3SYMPH  | GQ888404 |
| SkleOST    | GQ888405 |
| SpoCHILO   | GQ888406 |
| UfsBRANCH  | GQ888407 |

3006fin:

|            |          |
|------------|----------|
| A369COPE   | GQ888408 |
| AarPENTA   | GQ888409 |
| AchARACH   | GQ888410 |
| AdoNEOPT   | GQ888411 |
| AeliPYCNO  | GQ888412 |
| AhiPYCNO   | GQ888413 |
| AmaDIPLO   | GQ888414 |
| Amb2ARACH  | GQ888415 |
| Arg2BIURA  | GQ888416 |
| Avu3MALA   | GQ888417 |
| BbaTHECOS  | GQ888418 |
| CfrTHECOS  | GQ888419 |
| ClizYGEN   | GQ888420 |
| Col2PYCNO  | GQ888421 |
| Crp2ARACH  | GQ888422 |
| Ctas2CHILO | GQ888423 |
| EafCOPE    | GQ888424 |
| EfrDIPLUR  | GQ888425 |
| EinEPHEM   | GQ888426 |
| ElePYCNO   | GQ888427 |
| ErwONYCH   | GQ888428 |
| EuryPAURO  | GQ888429 |
| Han2SYMPH  | GQ888430 |
| HapaOST    | GQ888431 |
| HariARACH  | GQ888432 |
| HmaCEPHAL  | GQ888433 |
| HspARACH   | GQ888434 |
| IveODONAT  | GQ888435 |
| JapDIPLUR  | GQ888436 |
| LeanTHECOS | GQ888437 |
| LemMALA    | GQ888438 |
| LlyODONAT  | GQ888439 |
| LnigARACH  | GQ888440 |
| LoxTHECOS  | GQ888441 |
| MayEPHEM   | GQ888442 |
| MbaARCHEO  | GQ888443 |
| NeoMALA    | GQ888444 |
| NmeZYGEN   | GQ888445 |
| OimCOLL    | GQ888446 |
| PamNEOPT   | GQ888447 |
| PepONYCH   | GQ888448 |
| Pge2DIPLO  | GQ888449 |
| Pno2ONYCH  | GQ888450 |
| Pol2DIPLO  | GQ888451 |
| PsaARCHEO  | GQ888452 |
| ScolCHILO  | GQ888453 |
| Scu3SYMPH  | GQ888454 |
| SkleOST    | GQ888455 |
| SpoCHILO   | GQ888456 |
| Tom2COLL   | GQ888457 |
| UfsBRANCH  | GQ888458 |

3007fin:

|            |          |
|------------|----------|
| A369COPE   | GQ888459 |
| AchARACH   | GQ888460 |
| AdoNEOPT   | GQ888461 |
| AhiPYCNO   | GQ888462 |
| AmaDIPLO   | GQ888463 |
| Amb2ARACH  | GQ888464 |
| Arg2BIURA  | GQ888465 |
| Avu3MALA   | GQ888466 |
| BbaTHECOS  | GQ888467 |
| CfrTHECOS  | GQ888468 |
| Crp2ARACH  | GQ888469 |
| Ctas2CHILO | GQ888470 |
| Din2ARACH  | GQ888471 |
| DmaBRANCH  | GQ888472 |
| DtyMYSTACO | GQ888473 |
| EafCOPE    | GQ888474 |
| EfrDIPLUR  | GQ888475 |
| EgigARACH  | GQ888476 |
| ErwONYCH   | GQ888477 |
| EuryPAURO  | GQ888478 |
| Han2SYMPH  | GQ888479 |
| HapaOST    | GQ888480 |
| HspARACH   | GQ888481 |
| IpumARACH  | GQ888482 |
| IveODONAT  | GQ888483 |
| JapDIPLUR  | GQ888484 |
| LemMALA    | GQ888485 |
| Lle2BRANCH | GQ888486 |
| LlyODONAT  | GQ888487 |
| LnigARACH  | GQ888488 |
| LoxTHECOS  | GQ888489 |
| LynBRANCH  | GQ888490 |
| MayEPHEM   | GQ888491 |
| MbaARCHEO  | GQ888492 |
| NeoMALA    | GQ888493 |
| NmeZYGEM   | GQ888494 |
| OimCOLL    | GQ888495 |
| PamNEOPT   | GQ888496 |
| PepONYCH   | GQ888497 |
| Pge2DIPLO  | GQ888498 |
| Pma2ARACH  | GQ888499 |
| PsaARCHEO  | GQ888500 |
| PwhARACH   | GQ888501 |
| ScolCHILO  | GQ888502 |
| Scu3SYMPH  | GQ888503 |
| SpoCHILO   | GQ888504 |
| Tom2COLL   | GQ888505 |
| UfsBRANCH  | GQ888506 |



3009fin:

|            |          |
|------------|----------|
| A369COPE   | GQ885174 |
| AarPENTA   | GQ885175 |
| AchARACH   | GQ885176 |
| AdoNEOPT   | GQ885177 |
| AeliPYCNO  | GQ885178 |
| AhiPYCNO   | GQ885179 |
| Arg2BIURA  | GQ885180 |
| Asa3BRANCH | GQ885181 |
| Avu3MALA   | GQ885182 |
| CliZYGEN   | GQ885183 |
| Col2PYCNO  | GQ885184 |
| Crp2ARACH  | GQ885185 |
| Ctas2CHILO | GQ885186 |
| Din2ARACH  | GQ885187 |
| DmaBRANCH  | GQ885188 |
| DtyMYSTACO | GQ885189 |
| EafCOPE    | GQ885190 |
| EfrDIPLUR  | GQ885191 |
| EgigARACH  | GQ885192 |
| EinEPHEM   | GQ885193 |
| ElePYCNO   | GQ885194 |
| ErwONYCH   | GQ885195 |
| Han2SYMPH  | GQ885196 |
| HariARACH  | GQ885197 |
| HmaCEPHAL  | GQ885198 |
| HspARACH   | GQ885199 |
| IpumARACH  | GQ885200 |
| IveODONAT  | GQ885201 |
| JapDIPLUR  | GQ885202 |
| LemMALA    | GQ885203 |
| LnigARACH  | GQ885204 |
| MayEPHEM   | GQ885205 |
| MbaARCHEO  | GQ885206 |
| MtdTARD    | GQ885207 |
| NeoMALA    | GQ885208 |
| NmeZYGEN   | GQ885209 |
| OimCOLL    | GQ885210 |
| PepONYCH   | GQ885211 |
| Pge2DIPLO  | GQ885212 |
| Pma2ARACH  | GQ885213 |
| PsaARCHEO  | GQ885214 |
| PwhARACH   | GQ885215 |
| ScolCHILO  | GQ885216 |
| Scu3SYMPH  | GQ885217 |
| SkleOST    | GQ885218 |
| SpoCHILO   | GQ885219 |
| StpARACH   | GQ885220 |
| Tom2COLL   | GQ885221 |
| UfsBRANCH  | GQ885222 |

3012fin:

|            |          |
|------------|----------|
| A369COPE   | GQ885223 |
| AdoNEOPT   | GQ885224 |
| AeliPYCNO  | GQ885225 |
| AhiPYCNO   | GQ885226 |
| AmaDIPLO   | GQ885227 |
| Amb2ARACH  | GQ885228 |
| Arg2BIURA  | GQ885229 |
| Asa3BRANCH | GQ885230 |
| Avu3MALA   | GQ885231 |
| BbaTHECOS  | GQ885232 |
| CfrTHECOS  | GQ885233 |
| ClizYGEN   | GQ885234 |
| Col2PYCNO  | GQ885235 |
| Cro2XIPHOS | GQ885236 |
| Ctas2CHILO | GQ885237 |
| Din2ARACH  | GQ885238 |
| DmaBRANCH  | GQ885239 |
| EafCOPE    | GQ885240 |
| EfrDIPLUR  | GQ885241 |
| EinEPHEM   | GQ885242 |
| ElePYCNO   | GQ885243 |
| ErwONYCH   | GQ885244 |
| EuryPAURO  | GQ885245 |
| Han2SYMPH  | GQ885246 |
| HapaOST    | GQ885247 |
| HariARACH  | GQ885248 |
| HmaCEPHAL  | GQ885249 |
| HspARACH   | GQ885250 |
| IpumARACH  | GQ885251 |
| JapDIPLUR  | GQ885252 |
| LemMALA    | GQ885253 |
| Lle2BRANCH | GQ885254 |
| LoxTHECOS  | GQ885255 |
| LynBRANCH  | GQ885256 |
| MbaARCHEO  | GQ885257 |
| MtdTARD    | GQ885258 |
| NeoMALA    | GQ885259 |
| NmeZYGEN   | GQ885260 |
| OimCOLL    | GQ885261 |
| PepONYCH   | GQ885262 |
| Pma2ARACH  | GQ885263 |
| Pol2DIPLO  | GQ885264 |
| PsaARCHEO  | GQ885265 |
| PwhARACH   | GQ885266 |
| ScolCHILO  | GQ885267 |
| Scu3SYMPH  | GQ885268 |
| SkleOST    | GQ885269 |
| SpoCHILO   | GQ885270 |
| StpARACH   | GQ885271 |
| Tom2COLL   | GQ885272 |
| UfsBRANCH  | GQ885273 |

3017fin:

|            |          |
|------------|----------|
| A369COPE   | GQ885274 |
| AchARACH   | GQ885275 |
| AdoNEOPT   | GQ885276 |
| AeliPYCNO  | GQ885277 |
| AmaDIPLO   | GQ885278 |
| Arg2BIURA  | GQ885279 |
| Asa3BRANCH | GQ885280 |
| Avu3MALA   | GQ885281 |
| Cro2XIPHOS | GQ885282 |
| Crp2ARACH  | GQ885283 |
| Ctas2CHILO | GQ885284 |
| DmaBRANCH  | GQ885285 |
| DtyMYSTACO | GQ885286 |
| EafCOPE    | GQ885287 |
| EfrDIPLUR  | GQ885288 |
| EgigARACH  | GQ885289 |
| EinEPHEM   | GQ885290 |
| ElePYCNO   | GQ885291 |
| ErwONYCH   | GQ885292 |
| EuryPAURO  | GQ885293 |
| HariARACH  | GQ885294 |
| HspARACH   | GQ885295 |
| IpumARACH  | GQ885296 |
| IveODONAT  | GQ885297 |
| JapDIPLUR  | GQ885298 |
| LemMALA    | GQ885299 |
| LlyODONAT  | GQ885300 |
| LnigARACH  | GQ885301 |
| LoxTHECOS  | GQ885302 |
| MayEPHEM   | GQ885303 |
| MbaARCHEO  | GQ885304 |
| NeoMALA    | GQ885305 |
| NmeZYGEM   | GQ885306 |
| PamNEOPT   | GQ885307 |
| PepONYCH   | GQ885308 |
| Pge2DIPLO  | GQ885309 |
| Pma2ARACH  | GQ885310 |
| Pol2DIPLO  | GQ885311 |
| PsaARCHEO  | GQ885312 |
| PwhARACH   | GQ885313 |
| ScolCHILO  | GQ885314 |
| Scu3SYMPH  | GQ885315 |
| SkleOST    | GQ885316 |
| SpoCHILO   | GQ885317 |
| StpARACH   | GQ885318 |
| Tom2COLL   | GQ885319 |
| UfsBRANCH  | GQ885320 |

## 3031fin2\_3:

|            |          |
|------------|----------|
| AarPENTA   | GQ885321 |
| AhiPYCNO   | GQ885322 |
| AmaDIPLO   | GQ885323 |
| Amb2ARACH  | GQ885324 |
| Arg2BIURA  | GQ885325 |
| Asa3BRANCH | GQ885326 |
| Avu3MALA   | GQ885327 |
| BbaTHECOS  | GQ885328 |
| CfrTHECOS  | GQ885329 |
| CliZYGEN   | GQ885330 |
| Col2PYCNO  | GQ885331 |
| Crp2ARACH  | GQ885332 |
| Ctas2CHILO | GQ885333 |
| Din2ARACH  | GQ885334 |
| DmaBRANCH  | GQ885335 |
| DtyMYSTACO | GQ885336 |
| EfrDIPLUR  | GQ885337 |
| EgigARACH  | GQ885338 |
| ElePYCNO   | GQ885339 |
| EuryPAURO  | GQ885340 |
| Han2SYMPH  | GQ885341 |
| HariARACH  | GQ885342 |
| HspARACH   | GQ885343 |
| IpumARACH  | GQ885344 |
| IveODONAT  | GQ885345 |
| JapDIPLUR  | GQ885346 |
| LeanTHECOS | GQ885347 |
| LemMALA    | GQ885348 |
| Lle2BRANCH | GQ885349 |
| LlyODONAT  | GQ885350 |
| LnigARACH  | GQ885351 |
| LoxTHECOS  | GQ885352 |
| LynBRANCH  | GQ885353 |
| MbaARCHEO  | GQ885354 |
| NeoMALA    | GQ885355 |
| NmeZYGEN   | GQ885356 |
| OimCOLL    | GQ885357 |
| PamNEOPT   | GQ885358 |
| Pge2DIPLO  | GQ885359 |
| Pma2ARACH  | GQ885360 |
| PsaARCHEO  | GQ885361 |
| ScolCHILO  | GQ885362 |
| Scu3SYMPH  | GQ885363 |
| SpoCHILO   | GQ885364 |
| StpARACH   | GQ885365 |
| Tom2COLL   | GQ885366 |
| UfsBRANCH  | GQ885367 |

3031fin4\_5:  
AarPENTA GQ885368  
AchARACH GQ885369  
AdoNEOPT GQ885370  
AeliPYCNO GQ885371  
AhiPYCNO GQ885372  
AmaDIPLO GQ885373  
Amb2ARACH GQ885374  
Asa3BRANCH GQ885375  
Avu3MALA GQ885376  
BbaTHECOS GQ885377  
CfrTHECOS GQ885378  
ClizYGEN GQ885379  
Col2PYCNO GQ885380  
Crp2ARACH GQ885381  
Ctas2CHILO GQ885382  
Din2ARACH GQ885383  
DmaBRANCH GQ885384  
DtyMYSTACO GQ885385  
EafCOPE GQ885386  
EfrDIPLUR GQ885387  
EgigARACH GQ885388  
ElePYCNO GQ885389  
ErwONYCH GQ885390  
EuryPAURO GQ885391  
Han2SYMPH GQ885392  
HapaOST GQ885393  
HariARACH GQ885394  
HspARACH GQ885395  
IpumARACH GQ885396  
IveODONAT GQ885397  
JapDIPLUR GQ885398  
LeanTHECOS GQ885399  
Lle2BRANCH GQ885400  
LlyODONAT GQ885401  
LnigARACH GQ885402  
LoxTHECOS GQ885403  
LynBRANCH GQ885404  
MbaARCHEO GQ885405  
NeoMALA GQ885406  
OimCOLL GQ885407  
PamNEOPT GQ885408  
PepONYCH GQ885409  
Pma2ARACH GQ885410  
Pno2ONYCH GQ885411  
Pol2DIPLO GQ885412  
PsaARCHEO GQ885413  
ScolCHILO GQ885414  
Scu3SYMPH GQ885415  
SpoCHILO GQ885416  
StpARACH GQ885417  
Tom2COLL GQ885418

3044fin:

|            |          |
|------------|----------|
| AarPENTA   | GQ885419 |
| AchARACH   | GQ885420 |
| AdoNEOPT   | GQ885421 |
| AhiPYCNO   | GQ885422 |
| AmaDIPLO   | GQ885423 |
| Amb2ARACH  | GQ885424 |
| Arg2BIURA  | GQ885425 |
| Asa3BRANCH | GQ885426 |
| Avu3MALA   | GQ885427 |
| CfrTHECOS  | GQ885428 |
| ClizYGEN   | GQ885429 |
| Col2PYCNO  | GQ885430 |
| Cro2XIPHOS | GQ885431 |
| Crp2ARACH  | GQ885432 |
| Ctas2CHILO | GQ885433 |
| Din2ARACH  | GQ885434 |
| DmaBRANCH  | GQ885435 |
| EafCOPE    | GQ885436 |
| EfrDIPLUR  | GQ885437 |
| EinEPHEM   | GQ885438 |
| ElePYCNO   | GQ885439 |
| ErwONYCH   | GQ885440 |
| Han2SYMPH  | GQ885441 |
| HmaCEPHAL  | GQ885442 |
| IpumARACH  | GQ885443 |
| IveODONAT  | GQ885444 |
| JapDIPLUR  | GQ885445 |
| LemMALA    | GQ885446 |
| Lle2BRANCH | GQ885447 |
| LlyODONAT  | GQ885448 |
| LnigARACH  | GQ885449 |
| LoxTHECOS  | GQ885450 |
| LynBRANCH  | GQ885451 |
| MayEPHEM   | GQ885452 |
| MbaARCHEO  | GQ885453 |
| MtdTARD    | GQ885454 |
| NeoMALA    | GQ885455 |
| NmeZYGEN   | GQ885456 |
| OimCOLL    | GQ885457 |
| PepONYCH   | GQ885458 |
| Pge2DIPLO  | GQ885459 |
| Pno2ONYCH  | GQ885460 |
| Pol2DIPLO  | GQ885461 |
| PsaARCHEO  | GQ885462 |
| PwhARACH   | GQ885463 |
| ScolCHILO  | GQ885464 |
| Scu3SYMPH  | GQ885465 |
| SkleOST    | GQ885466 |
| SpoCHILO   | GQ885467 |
| StpARACH   | GQ885468 |
| Tom2COLL   | GQ885469 |
| UfsBRANCH  | GQ885470 |

3055fin:

|            |          |
|------------|----------|
| A369COPE   | GQ885471 |
| AchARACH   | GQ885472 |
| AdoNEOPT   | GQ885473 |
| AeliPYCNO  | GQ885474 |
| AhiPYCNO   | GQ885475 |
| AmaDIPLO   | GQ885476 |
| Amb2ARACH  | GQ885477 |
| Arg2BIURA  | GQ885478 |
| Avu3MALA   | GQ885479 |
| BbaTHECOS  | GQ885480 |
| CfrTHECOS  | GQ885481 |
| ClizYGEN   | GQ885482 |
| Col2PYCNO  | GQ885483 |
| Cro2XIPHOS | GQ885484 |
| Crp2ARACH  | GQ885485 |
| Ctas2CHILO | GQ885486 |
| Din2ARACH  | GQ885487 |
| DmaBRANCH  | GQ885488 |
| EafCOPE    | GQ885489 |
| EfrDIPLUR  | GQ885490 |
| EinEPHEM   | GQ885491 |
| ElePYCNO   | GQ885492 |
| ErwONYCH   | GQ885493 |
| EuryPAURO  | GQ885494 |
| Han2SYMPH  | GQ885495 |
| HariARACH  | GQ885496 |
| HmaCEPHAL  | GQ885497 |
| HspARACH   | GQ885498 |
| IveODONAT  | GQ885499 |
| JapDIPLUR  | GQ885500 |
| LeanTHECOS | GQ885501 |
| LemMALA    | GQ885502 |
| LnigARACH  | GQ885503 |
| LynBRANCH  | GQ885504 |
| MayEPHEM   | GQ885505 |
| MtdTARD    | GQ885506 |
| NeoMALA    | GQ885507 |
| NmeZYGEN   | GQ885508 |
| OimCOLL    | GQ885509 |
| PamNEOPT   | GQ885510 |
| PepONYCH   | GQ885511 |
| Pma2ARACH  | GQ885512 |
| Pno2ONYCH  | GQ885513 |
| PsaARCHEO  | GQ885514 |
| PwhARACH   | GQ885515 |
| ScolCHILO  | GQ885516 |
| Scu3SYMPH  | GQ885517 |
| SkleOST    | GQ885518 |
| StpARACH   | GQ885519 |
| Tom2COLL   | GQ885520 |

3059fin:

|            |          |
|------------|----------|
| A369COPE   | GQ885521 |
| AarPENTA   | GQ885522 |
| AchARACH   | GQ885523 |
| AdoNEOPT   | GQ885524 |
| AeliPYCNO  | GQ885525 |
| AhiPYCNO   | GQ885526 |
| AmaDIPLO   | GQ885527 |
| Amb2ARACH  | GQ885528 |
| Arg2BIURA  | GQ885529 |
| Asa3BRANCH | GQ885530 |
| Avu3MALA   | GQ885531 |
| BbaTHECOS  | GQ885532 |
| CfrTHECOS  | GQ885533 |
| ClizYGEN   | GQ885534 |
| Col2PYCNO  | GQ885535 |
| Crp2ARACH  | GQ885536 |
| Ctas2CHILO | GQ885537 |
| Din2ARACH  | GQ885538 |
| DmaBRANCH  | GQ885539 |
| DtyMYSTACO | GQ885540 |
| EafCOPE    | GQ885541 |
| EfrDIPLUR  | GQ885542 |
| EgigARACH  | GQ885543 |
| EinEPHEM   | GQ885544 |
| ErwONYCH   | GQ885545 |
| EuryPAURO  | GQ885546 |
| HariARACH  | GQ885547 |
| HmaCEPHAL  | GQ885548 |
| HspARACH   | GQ885549 |
| IpumARACH  | GQ885550 |
| IveODONAT  | GQ885551 |
| JapDIPLUR  | GQ885552 |
| LeanTHECOS | GQ885553 |
| LemMALA    | GQ885554 |
| Lle2BRANCH | GQ885555 |
| LlyODONAT  | GQ885556 |
| LnigARACH  | GQ885557 |
| MtdTARD    | GQ885558 |
| NeoMALA    | GQ885559 |
| NmeZYGEN   | GQ885560 |
| OimCOLL    | GQ885561 |
| PamNEOPT   | GQ885562 |
| PepONYCH   | GQ885563 |
| Pma2ARACH  | GQ885564 |
| PsaARCHEO  | GQ885565 |
| PwhARACH   | GQ885566 |
| ScolCHILO  | GQ885567 |
| SkleOST    | GQ885568 |
| SpoCHILO   | GQ885569 |
| StpARACH   | GQ885570 |
| Tom2COLL   | GQ885571 |
| UfsBRANCH  | GQ885572 |



3064fin:

|            |          |
|------------|----------|
| A369COPE   | GQ885573 |
| AarPENTA   | GQ885574 |
| AchARACH   | GQ885575 |
| AdoNEOPT   | GQ885576 |
| AeliPYCNO  | GQ885577 |
| AhiPYCNO   | GQ885578 |
| AmaDIPLO   | GQ885579 |
| Amb2ARACH  | GQ885580 |
| Arg2BIURA  | GQ885581 |
| Asa3BRANCH | GQ885582 |
| Avu3MALA   | GQ885583 |
| BbaTHECOS  | GQ885584 |
| CfrTHECOS  | GQ885585 |
| ClizYGEN   | GQ885586 |
| Col2PYCNO  | GQ885587 |
| Crp2ARACH  | GQ885588 |
| Ctas2CHILO | GQ885589 |
| Din2ARACH  | GQ885590 |
| DmaBRANCH  | GQ885591 |
| EafCOPE    | GQ885592 |
| EfrDIPLUR  | GQ885593 |
| EgigARACH  | GQ885594 |
| EinEPHEM   | GQ885595 |
| ElePYCNO   | GQ885596 |
| ErwONYCH   | GQ885597 |
| EuryPAURO  | GQ885598 |
| Han2SYMPH  | GQ885599 |
| HapaOST    | GQ885600 |
| HariARACH  | GQ885601 |
| HmaCEPHAL  | GQ885602 |
| HspARACH   | GQ885603 |
| IpumARACH  | GQ885604 |
| IveODONAT  | GQ885605 |
| JapDIPLUR  | GQ885606 |
| LeanTHECOS | GQ885607 |
| Lle2BRANCH | GQ885608 |
| LlyODONAT  | GQ885609 |
| LnigARACH  | GQ885610 |
| LoxTHECOS  | GQ885611 |
| LynBRANCH  | GQ885612 |
| MayEPHEM   | GQ885613 |
| MtdTARD    | GQ885614 |
| NeoMALA    | GQ885615 |
| NmeZYGEN   | GQ885616 |
| OimCOLL    | GQ885617 |
| PamNEOPT   | GQ885618 |
| PepONYCH   | GQ885619 |
| Pge2DIPLO  | GQ885620 |
| Pma2ARACH  | GQ885621 |
| Pno2ONYCH  | GQ885622 |
| Pol2DIPLO  | GQ885623 |
| PsaARCHEO  | GQ885624 |
| PwhARACH   | GQ885625 |
| ScolCHILO  | GQ885626 |
| Scu3SYMPH  | GQ885627 |
| SkleOST    | GQ885628 |
| SpoCHILO   | GQ885629 |
| StpARACH   | GQ885630 |
| Tom2COLL   | GQ885631 |
| UfsBRANCH  | GQ885632 |

3066fin:

|            |          |
|------------|----------|
| A369COPE   | GQ885633 |
| AarPENTA   | GQ885634 |
| AchARACH   | GQ885635 |
| AdoNEOPT   | GQ885636 |
| AmaDIPLO   | GQ885637 |
| Amb2ARACH  | GQ885638 |
| Arg2BIURA  | GQ885639 |
| Avu3MALA   | GQ885640 |
| CliZYGEN   | GQ885641 |
| Col2PYCNO  | GQ885642 |
| Cro2XIPHOS | GQ885643 |
| Crp2ARACH  | GQ885644 |
| Ctas2CHILO | GQ885645 |
| EafCOPE    | GQ885646 |
| EfrDIPLUR  | GQ885647 |
| EgigARACH  | GQ885648 |
| EinEPHEM   | GQ885649 |
| ErwONYCH   | GQ885650 |
| HariARACH  | GQ885651 |
| HspARACH   | GQ885652 |
| IpumARACH  | GQ885653 |
| IveODONAT  | GQ885654 |
| LemMALA    | GQ885655 |
| Lle2BRANCH | GQ885656 |
| LlyODONAT  | GQ885657 |
| LnigARACH  | GQ885658 |
| LynBRANCH  | GQ885659 |
| MayEPHEM   | GQ885660 |
| MtdTARD    | GQ885661 |
| NeoMALA    | GQ885662 |
| NmeZYGEN   | GQ885663 |
| OimCOLL    | GQ885664 |
| PamNEOPT   | GQ885665 |
| PepONYCH   | GQ885666 |
| Pge2DIPLO  | GQ885667 |
| Pma2ARACH  | GQ885668 |
| Pol2DIPLO  | GQ885669 |
| PsaARCHEO  | GQ885670 |
| PwhARACH   | GQ885671 |
| ScolCHILO  | GQ885672 |
| SkleOST    | GQ885673 |
| SpoCHILO   | GQ885674 |
| StpARACH   | GQ885675 |
| Tom2COLL   | GQ885676 |

3070fin:

|            |          |
|------------|----------|
| A369COPE   | GQ885677 |
| AarPENTA   | GQ885678 |
| AchARACH   | GQ885679 |
| AdoNEOPT   | GQ885680 |
| AmaDIPLO   | GQ885681 |
| Arg2BIURA  | GQ885682 |
| Asa3BRANCH | GQ885683 |
| Avu3MALA   | GQ885684 |
| CfrTHECOS  | GQ885685 |
| ClizYGEN   | GQ885686 |
| Cro2XIPHOS | GQ885687 |
| Crp2ARACH  | GQ885688 |
| Din2ARACH  | GQ885689 |
| DmaBRANCH  | GQ885690 |
| EafCOPE    | GQ885691 |
| EgigARACH  | GQ885692 |
| ErwONYCH   | GQ885693 |
| EuryPAURO  | GQ885694 |
| Han2SYMPH  | GQ885695 |
| HariARACH  | GQ885696 |
| HspARACH   | GQ885697 |
| IpumARACH  | GQ885698 |
| IveODONAT  | GQ885699 |
| LemMALA    | GQ885700 |
| Lle2BRANCH | GQ885701 |
| LlyODONAT  | GQ885702 |
| LnigARACH  | GQ885703 |
| LoxTHECOS  | GQ885704 |
| LynBRANCH  | GQ885705 |
| MayEPHEM   | GQ885706 |
| MtdTARD    | GQ885707 |
| NeoMALA    | GQ885708 |
| OimCOLL    | GQ885709 |
| PamNEOPT   | GQ885710 |
| PepONYCH   | GQ885711 |
| Pge2DIPLO  | GQ885712 |
| Pma2ARACH  | GQ885713 |
| PsaARCHEO  | GQ885714 |
| PwhARACH   | GQ885715 |
| ScolCHILO  | GQ885716 |
| Scu3SYMPH  | GQ885717 |
| SkleOST    | GQ885718 |
| SpoCHILO   | GQ885719 |
| StpARACH   | GQ885720 |
| Tom2COLL   | GQ885721 |
| UfsBRANCH  | GQ885722 |

3089fin:

|            |          |
|------------|----------|
| A369COPE   | GQ885723 |
| AarPENTA   | GQ885724 |
| AchARACH   | GQ885725 |
| AdoNEOPT   | GQ885726 |
| AeliPYCNO  | GQ885727 |
| AhiPYCNO   | GQ885728 |
| AmaDIPLO   | GQ885729 |
| Amb2ARACH  | GQ885730 |
| Arg2BIURA  | GQ885731 |
| Asa3BRANCH | GQ885732 |
| Avu3MALA   | GQ885733 |
| BbaTHECOS  | GQ885734 |
| CfrTHECOS  | GQ885735 |
| ClizYGEN   | GQ885736 |
| Col2PYCNO  | GQ885737 |
| Cro2XIPHOS | GQ885738 |
| Crp2ARACH  | GQ885739 |
| Ctas2CHILO | GQ885740 |
| Din2ARACH  | GQ885741 |
| DtyMYSTACO | GQ885742 |
| EafCOPE    | GQ885743 |
| EfrDIPLUR  | GQ885744 |
| EgigARACH  | GQ885745 |
| EinEPHEM   | GQ885746 |
| ElePYCNO   | GQ885747 |
| ErwONYCH   | GQ885748 |
| EuryPAURO  | GQ885749 |
| Han2SYMPH  | GQ885750 |
| HapaOST    | GQ885751 |
| HariARACH  | GQ885752 |
| HmaCEPHAL  | GQ885753 |
| HspARACH   | GQ885754 |
| IpumARACH  | GQ885755 |
| IveODONAT  | GQ885756 |
| JapDIPLUR  | GQ885757 |
| LeanTHECOS | GQ885758 |
| LemMALA    | GQ885759 |
| Lle2BRANCH | GQ885760 |
| LlyODONAT  | GQ885761 |
| LnigARACH  | GQ885762 |
| LynBRANCH  | GQ885763 |
| MayEPHEM   | GQ885764 |
| MtdTARD    | GQ885765 |
| NeoMALA    | GQ885766 |
| NmeZYGEN   | GQ885767 |
| OimCOLL    | GQ885768 |
| PepONYCH   | GQ885769 |
| Pge2DIPLO  | GQ885770 |
| Pma2ARACH  | GQ885771 |
| Pno2ONYCH  | GQ885772 |
| PsaARCHEO  | GQ885773 |
| PwhARACH   | GQ885774 |
| ScolCHILO  | GQ885775 |
| Scu3SYMPH  | GQ885776 |
| SkleOST    | GQ885777 |
| SpoCHILO   | GQ885778 |
| StpARACH   | GQ885779 |
| Tom2COLL   | GQ885780 |
| UfsBRANCH  | GQ885781 |

3094fin:

|            |          |
|------------|----------|
| AchARACH   | GQ885782 |
| AdoNEOPT   | GQ885783 |
| AeliPYCNO  | GQ885784 |
| AhiPYCNO   | GQ885785 |
| AmaDIPLO   | GQ885786 |
| Amb2ARACH  | GQ885787 |
| Arg2BIURA  | GQ885788 |
| Asa3BRANCH | GQ885789 |
| BbaTHECOS  | GQ885790 |
| CfrTHECOS  | GQ885791 |
| ClizYGEN   | GQ885792 |
| Col2PYCNO  | GQ885793 |
| Cro2XIPHOS | GQ885794 |
| Crp2ARACH  | GQ885795 |
| Ctas2CHILO | GQ885796 |
| Din2ARACH  | GQ885797 |
| DmaBRANCH  | GQ885798 |
| DtyMYSTACO | GQ885799 |
| EafCOPE    | GQ885800 |
| EfrDIPLUR  | GQ885801 |
| EgigARACH  | GQ885802 |
| ElePYCNO   | GQ885803 |
| ErwONYCH   | GQ885804 |
| EuryPAURO  | GQ885805 |
| Han2SYMPH  | GQ885806 |
| HapaOST    | GQ885807 |
| HariARACH  | GQ885808 |
| HmaCEPHAL  | GQ885809 |
| HspARACH   | GQ885810 |
| IpumARACH  | GQ885811 |
| IveODONAT  | GQ885812 |
| JapDIPLUR  | GQ885813 |
| LeanTHECOS | GQ885814 |
| LemMALA    | GQ885815 |
| Lle2BRANCH | GQ885816 |
| LlyODONAT  | GQ885817 |
| LnigARACH  | GQ885818 |
| LoxTHECOS  | GQ885819 |
| LynBRANCH  | GQ885820 |
| MtdTARD    | GQ885821 |
| NeoMALA    | GQ885822 |
| NmeZYGEN   | GQ885823 |
| OimCOLL    | GQ885824 |
| PamNEOPT   | GQ885825 |
| PepONYCH   | GQ885826 |
| Pge2DIPLO  | GQ885827 |
| Pma2ARACH  | GQ885828 |
| Pol2DIPLO  | GQ885829 |
| PsaARCHEO  | GQ885830 |
| PwhARACH   | GQ885831 |
| ScolCHILO  | GQ885832 |
| Scu3SYMPH  | GQ885833 |
| SkleOST    | GQ885834 |
| SpoCHILO   | GQ885835 |
| StpARACH   | GQ885836 |
| UfsBRANCH  | GQ885837 |

3114fin:

|            |          |
|------------|----------|
| A369COPE   | GQ885838 |
| AdoNEOPT   | GQ885839 |
| AeliPYCNO  | GQ885840 |
| AhiPYCNO   | GQ885841 |
| Arg2BIURA  | GQ885842 |
| Asa3BRANCH | GQ885843 |
| Avu3MALA   | GQ885844 |
| BbaTHECOS  | GQ885845 |
| CfrTHECOS  | GQ885846 |
| CliZYGEN   | GQ885847 |
| Crp2ARACH  | GQ885848 |
| Ctas2CHILO | GQ885849 |
| Din2ARACH  | GQ885850 |
| EafCOPE    | GQ885851 |
| EfrDIPLUR  | GQ885852 |
| EgigARACH  | GQ885853 |
| EinEPHEM   | GQ885854 |
| ElePYCNO   | GQ885855 |
| ErwONYCH   | GQ885856 |
| EuryPAURO  | GQ885857 |
| Han2SYMPH  | GQ885858 |
| IpumARACH  | GQ885859 |
| IveODONAT  | GQ885860 |
| JapDIPLUR  | GQ885861 |
| LeanTHECOS | GQ885862 |
| LemMALA    | GQ885863 |
| Lle2BRANCH | GQ885864 |
| LlyODONAT  | GQ885865 |
| LnigARACH  | GQ885866 |
| LoxTHECOS  | GQ885867 |
| MayEPHEM   | GQ885868 |
| NeomMALA   | GQ885869 |
| NmeZYGEN   | GQ885870 |
| PamNEOPT   | GQ885871 |
| Pge2DIPLO  | GQ885872 |
| Pno2ONYCH  | GQ885873 |
| PsaARCHEO  | GQ885874 |
| PwhARACH   | GQ885875 |
| ScolCHILO  | GQ885876 |
| Scu3SYMPH  | GQ885877 |
| SpoCHILO   | GQ885878 |
| Tom2COLL   | GQ885879 |
| UfsBRANCH  | GQ885880 |

3121fin:

|            |          |
|------------|----------|
| A369COPE   | GQ885881 |
| AarPENTA   | GQ885882 |
| AchARACH   | GQ885883 |
| AdoNEOPT   | GQ885884 |
| AeliPYCNO  | GQ885885 |
| AhiPYCNO   | GQ885886 |
| Amb2ARACH  | GQ885887 |
| Arg2BIURA  | GQ885888 |
| Asa3BRANCH | GQ885889 |
| Avu3MALA   | GQ885890 |
| ClizYGEN   | GQ885891 |
| Crp2ARACH  | GQ885892 |
| Ctas2CHILO | GQ885893 |
| Din2ARACH  | GQ885894 |
| DmaBRANCH  | GQ885895 |
| EfrDIPLUR  | GQ885896 |
| EgigARACH  | GQ885897 |
| EinEPHEM   | GQ885898 |
| ElePYCNO   | GQ885899 |
| ErwONYCH   | GQ885900 |
| EuryPAURO  | GQ885901 |
| Han2SYMPH  | GQ885902 |
| HariARACH  | GQ885903 |
| HmaCEPHAL  | GQ885904 |
| IpumARACH  | GQ885905 |
| IveODONAT  | GQ885906 |
| JapDIPLUR  | GQ885907 |
| LemMALA    | GQ885908 |
| Lle2BRANCH | GQ885909 |
| LlyODONAT  | GQ885910 |
| LnigARACH  | GQ885911 |
| LynBRANCH  | GQ885912 |
| MayEPHEM   | GQ885913 |
| MtdTARD    | GQ885914 |
| NeoMALA    | GQ885915 |
| PamNEOPT   | GQ885916 |
| PepONYCH   | GQ885917 |
| Pge2DIPLO  | GQ885918 |
| Pma2ARACH  | GQ885919 |
| Pno2ONYCH  | GQ885920 |
| PsaARCHEO  | GQ885921 |
| PwhARACH   | GQ885922 |
| ScolCHILO  | GQ885923 |
| Scu3SYMPH  | GQ885924 |
| SkleOST    | GQ885925 |
| SpoCHILO   | GQ885926 |
| StpARACH   | GQ885927 |
| UfsBRANCH  | GQ885928 |

3136fin:

|            |          |
|------------|----------|
| A369COPE   | GQ885929 |
| AarPENTA   | GQ885930 |
| AchARACH   | GQ885931 |
| AdoNEOPT   | GQ885932 |
| AeliPYCNO  | GQ885933 |
| AhiPYCNO   | GQ885934 |
| AmaDIPLO   | GQ885935 |
| Amb2ARACH  | GQ885936 |
| Arg2BIURA  | GQ885937 |
| Asa3BRANCH | GQ885938 |
| Avu3MALA   | GQ885939 |
| BbaTHECOS  | GQ885940 |
| CfrTHECOS  | GQ885941 |
| ClizYGEN   | GQ885942 |
| Col2PYCNO  | GQ885943 |
| Cro2XIPHOS | GQ885944 |
| Crp2ARACH  | GQ885945 |
| Ctas2CHILO | GQ885946 |
| Din2ARACH  | GQ885947 |
| DmaBRANCH  | GQ885948 |
| EafCOPE    | GQ885949 |
| EfrDIPLUR  | GQ885950 |
| EgigARACH  | GQ885951 |
| EinEPHEM   | GQ885952 |
| ElePYCNO   | GQ885953 |
| ErwONYCH   | GQ885954 |
| EuryPAURO  | GQ885955 |
| Han2SYMPH  | GQ885956 |
| HariARACH  | GQ885957 |
| HmaCEPHAL  | GQ885958 |
| HspARACH   | GQ885959 |
| IpumARACH  | GQ885960 |
| IveODONAT  | GQ885961 |
| JapDIPLUR  | GQ885962 |
| LeanTHECOS | GQ885963 |
| LemMALA    | GQ885964 |
| Lle2BRANCH | GQ885965 |
| LlyODONAT  | GQ885966 |
| LnigARACH  | GQ885967 |
| LoxTHECOS  | GQ885968 |
| LynBRANCH  | GQ885969 |
| MayEPHEM   | GQ885970 |
| MbaARCHEO  | GQ885971 |
| MtdTARD    | GQ885972 |
| NeoMALA    | GQ885973 |
| NmeZYGEN   | GQ885974 |
| OimCOLL    | GQ885975 |
| PamNEOPT   | GQ885976 |
| PepONYCH   | GQ885977 |
| Pge2DIPLO  | GQ885978 |
| Pma2ARACH  | GQ885979 |
| Pol2DIPLO  | GQ885980 |
| PsaARCHEO  | GQ885981 |
| PwhARACH   | GQ885982 |
| ScolCHILO  | GQ885983 |
| SkleOST    | GQ885984 |
| SpoCHILO   | GQ885985 |
| StpARACH   | GQ885986 |
| Tom2COLL   | GQ885987 |
| UfsBRANCH  | GQ885988 |



3152fin:

|            |          |
|------------|----------|
| A369COPE   | GQ885989 |
| AarPENTA   | GQ885990 |
| AchARACH   | GQ885991 |
| AdoNEOPT   | GQ885992 |
| AmaDIPLO   | GQ885993 |
| Amb2ARACH  | GQ885994 |
| Arg2BIURA  | GQ885995 |
| Asa3BRANCH | GQ885996 |
| Avu3MALA   | GQ885997 |
| BbaTHECOS  | GQ885998 |
| Col2PYCNO  | GQ885999 |
| Cro2XIPHOS | GQ886000 |
| Crp2ARACH  | GQ886001 |
| Ctas2CHILO | GQ886002 |
| Din2ARACH  | GQ886003 |
| DmaBRANCH  | GQ886004 |
| EafCOPE    | GQ886005 |
| EfrDIPLUR  | GQ886006 |
| EgigARACH  | GQ886007 |
| EinEPHEM   | GQ886008 |
| ErwONYCH   | GQ886009 |
| Han2SYMPH  | GQ886010 |
| HariARACH  | GQ886011 |
| HmaCEPHAL  | GQ886012 |
| HspARACH   | GQ886013 |
| IpumARACH  | GQ886014 |
| IveODONAT  | GQ886015 |
| JapDIPLUR  | GQ886016 |
| LeanTHECOS | GQ886017 |
| Lle2BRANCH | GQ886018 |
| LlyODONAT  | GQ886019 |
| LnigARACH  | GQ886020 |
| LynBRANCH  | GQ886021 |
| MayEPHEM   | GQ886022 |
| MtdTARD    | GQ886023 |
| NeoMALA    | GQ886024 |
| NmeZYGEM   | GQ886025 |
| OimCOLL    | GQ886026 |
| PamNEOPT   | GQ886027 |
| PepONYCH   | GQ886028 |
| Pge2DIPLO  | GQ886029 |
| Pma2ARACH  | GQ886030 |
| Pno2ONYCH  | GQ886031 |
| Pol2DIPLO  | GQ886032 |
| PsaARCHEO  | GQ886033 |
| ScolCHILO  | GQ886034 |
| Scu3SYMPH  | GQ886035 |
| SkleOST    | GQ886036 |
| SpoCHILO   | GQ886037 |
| Tom2COLL   | GQ886038 |
| UfsBRANCH  | GQ886039 |

3153fin:

|            |          |
|------------|----------|
| A369COPE   | GQ886040 |
| AarPENTA   | GQ886041 |
| AchARACH   | GQ886042 |
| AdoNEOPT   | GQ886043 |
| AeliPYCNO  | GQ886044 |
| AhiPYCNO   | GQ886045 |
| AmaDIPLO   | GQ886046 |
| Amb2ARACH  | GQ886047 |
| Arg2BIURA  | GQ886048 |
| Asa3BRANCH | GQ886049 |
| Avu3MALA   | GQ886050 |
| BbaTHECOS  | GQ886051 |
| CfrTHECOS  | GQ886052 |
| ClizYGEN   | GQ886053 |
| Col2PYCNO  | GQ886054 |
| Cro2XIPHOS | GQ886055 |
| Ctas2CHILO | GQ886056 |
| Din2ARACH  | GQ886057 |
| DmaBRANCH  | GQ886058 |
| EafCOPE    | GQ886059 |
| EgigARACH  | GQ886060 |
| EinEPHEM   | GQ886061 |
| ElePYCNO   | GQ886062 |
| ErwONYCH   | GQ886063 |
| EuryPAURO  | GQ886064 |
| Han2SYMPH  | GQ886065 |
| HapaOST    | GQ886066 |
| HariARACH  | GQ886067 |
| HspARACH   | GQ886068 |
| IpumARACH  | GQ886069 |
| IveODONAT  | GQ886070 |
| LeanTHECOS | GQ886071 |
| LemMALA    | GQ886072 |
| Lle2BRANCH | GQ886073 |
| LlyODONAT  | GQ886074 |
| LoxTHECOS  | GQ886075 |
| LynBRANCH  | GQ886076 |
| MayEPHEM   | GQ886077 |
| MbaARCHEO  | GQ886078 |
| NeoMALA    | GQ886079 |
| NmeZYGEN   | GQ886080 |
| OimCOLL    | GQ886081 |
| PamNEOPT   | GQ886082 |
| PepONYCH   | GQ886083 |
| Pge2DIPLO  | GQ886084 |
| Pma2ARACH  | GQ886085 |
| Pno2ONYCH  | GQ886086 |
| Pol2DIPLO  | GQ886087 |
| PsaARCHEO  | GQ886088 |
| ScolCHILO  | GQ886089 |
| Scu3SYMPH  | GQ886090 |
| SkleOST    | GQ886091 |
| SpoCHILO   | GQ886092 |
| StpARACH   | GQ886093 |
| Tom2COLL   | GQ886094 |
| UfsBRANCH  | GQ886095 |

3196fin1\_3:

|            |          |
|------------|----------|
| A369COPE   | GQ886096 |
| AarPENTA   | GQ886097 |
| AchARACH   | GQ886098 |
| AdoNEOPT   | GQ886099 |
| AeliPYCNO  | GQ886100 |
| AhiPYCNO   | GQ886101 |
| AmaDIPLO   | GQ886102 |
| Amb2ARACH  | GQ886103 |
| Arg2BIURA  | GQ886104 |
| Asa3BRANCH | GQ886105 |
| Avu3MALA   | GQ886106 |
| BbaTHECOS  | GQ886107 |
| CfrTHECOS  | GQ886108 |
| ClizYGEN   | GQ886109 |
| Col2PYCNO  | GQ886110 |
| Crp2ARACH  | GQ886111 |
| Ctas2CHILO | GQ886112 |
| Din2ARACH  | GQ886113 |
| DmaBRANCH  | GQ886114 |
| DtyMYSTACO | GQ886115 |
| EafCOPE    | GQ886116 |
| EfrDIPLUR  | GQ886117 |
| EinEPHEM   | GQ886118 |
| ElePYCNO   | GQ886119 |
| EuryPAURO  | GQ886120 |
| Han2SYMPH  | GQ886121 |
| HariARACH  | GQ886122 |
| HmaCEPHAL  | GQ886123 |
| HspARACH   | GQ886124 |
| IpumARACH  | GQ886125 |
| IveODONAT  | GQ886126 |
| JapDIPLUR  | GQ886127 |
| LemMALA    | GQ886128 |
| Lle2BRANCH | GQ886129 |
| LlyODONAT  | GQ886130 |
| LnigARACH  | GQ886131 |
| LoxTHECOS  | GQ886132 |
| LynBRANCH  | GQ886133 |
| MayEPHEM   | GQ886134 |
| MbaARCHEO  | GQ886135 |
| MtdTARD    | GQ886136 |
| NeoMALA    | GQ886137 |
| NmeZYGEN   | GQ886138 |
| OimCOLL    | GQ886139 |
| PamNEOPT   | GQ886140 |
| Pge2DIPLO  | GQ886141 |
| Pma2ARACH  | GQ886142 |
| Pno2ONYCH  | GQ886143 |
| Pol2DIPLO  | GQ886144 |
| PsaARCHEO  | GQ886145 |
| PwhARACH   | GQ886146 |
| ScolCHILO  | GQ886147 |
| Scu3SYMPH  | GQ886148 |
| SkleOST    | GQ886149 |
| SpoCHILO   | GQ886150 |
| StpARACH   | GQ886151 |
| Tom2COLL   | GQ886152 |
| UfsBRANCH  | GQ886153 |

3196fin5\_6:

|            |          |
|------------|----------|
| AarPENTA   | GQ886154 |
| AchARACH   | GQ886155 |
| AdoNEOPT   | GQ886156 |
| AeliPYCNO  | GQ886157 |
| AhiPYCNO   | GQ886158 |
| AmaDIPLO   | GQ886159 |
| Amb2ARACH  | GQ886160 |
| Arg2BIURA  | GQ886161 |
| Asa3BRANCH | GQ886162 |
| Avu3MALA   | GQ886163 |
| BbaTHECOS  | GQ886164 |
| CfrTHECOS  | GQ886165 |
| ClizYGEN   | GQ886166 |
| Col2PYCNO  | GQ886167 |
| Cro2XIPHOS | GQ886168 |
| Crp2ARACH  | GQ886169 |
| Ctas2CHILO | GQ886170 |
| Din2ARACH  | GQ886171 |
| DmaBRANCH  | GQ886172 |
| DtyMYSTACO | GQ886173 |
| EafCOPE    | GQ886174 |
| EfrDIPLUR  | GQ886175 |
| EgigARACH  | GQ886176 |
| EinEPHEM   | GQ886177 |
| ElePYCNO   | GQ886178 |
| EuryPAURO  | GQ886179 |
| Han2SYMPH  | GQ886180 |
| HariARACH  | GQ886181 |
| HmaCEPHAL  | GQ886182 |
| HspARACH   | GQ886183 |
| IpumARACH  | GQ886184 |
| IveODONAT  | GQ886185 |
| JapDIPLUR  | GQ886186 |
| LeanTHECOS | GQ886187 |
| LemMALA    | GQ886188 |
| Lle2BRANCH | GQ886189 |
| LlyODONAT  | GQ886190 |
| LnigARACH  | GQ886191 |
| LoxTHECOS  | GQ886192 |
| LynBRANCH  | GQ886193 |
| MayEPHEM   | GQ886194 |
| MbaARCHEO  | GQ886195 |
| NeoMALA    | GQ886196 |
| NmeZYGEN   | GQ886197 |
| OimCOLL    | GQ886198 |
| PamNEOPT   | GQ886199 |
| PepONYCH   | GQ886200 |
| Pge2DIPLO  | GQ886201 |
| Pma2ARACH  | GQ886202 |
| Pno2ONYCH  | GQ886203 |
| Pol2DIPLO  | GQ886204 |
| PsaARCHEO  | GQ886205 |
| PwhARACH   | GQ886206 |
| ScolCHILO  | GQ886207 |
| Scu3SYMPH  | GQ886208 |
| SkleOST    | GQ886209 |
| SpoCHILO   | GQ886210 |
| StpARACH   | GQ886211 |
| Tom2COLL   | GQ886212 |
| UfsBRANCH  | GQ886213 |

3202fin:

|            |          |
|------------|----------|
| AarPENTA   | GQ886214 |
| AchARACH   | GQ886215 |
| AdoNEOPT   | GQ886216 |
| AeliPYCNO  | GQ886217 |
| AhiPYCNO   | GQ886218 |
| AmaDIPLO   | GQ886219 |
| Amb2ARACH  | GQ886220 |
| Arg2BIURA  | GQ886221 |
| Avu3MALA   | GQ886222 |
| BbaTHECOS  | GQ886223 |
| ClizYGEN   | GQ886224 |
| Col2PYCNO  | GQ886225 |
| Cro2XIPHOS | GQ886226 |
| Crp2ARACH  | GQ886227 |
| Ctas2CHILO | GQ886228 |
| DmaBRANCH  | GQ886229 |
| DtyMYSTACO | GQ886230 |
| EafCOPE    | GQ886231 |
| EfrDIPLUR  | GQ886232 |
| EinEPHEM   | GQ886233 |
| ErwONYCH   | GQ886234 |
| EuryPAURO  | GQ886235 |
| Han2SYMPH  | GQ886236 |
| HmaCEPHAL  | GQ886237 |
| IveODONAT  | GQ886238 |
| JapDIPLUR  | GQ886239 |
| LeanTHECOS | GQ886240 |
| LemMALA    | GQ886241 |
| Lle2BRANCH | GQ886242 |
| LlyODONAT  | GQ886243 |
| LnigARACH  | GQ886244 |
| LoxTHECOS  | GQ886245 |
| LynBRANCH  | GQ886246 |
| MayEPHEM   | GQ886247 |
| MbaARCHEO  | GQ886248 |
| MtdTARD    | GQ886249 |
| NmeZYGEN   | GQ886250 |
| OimCOLL    | GQ886251 |
| PamNEOPT   | GQ886252 |
| PepONYCH   | GQ886253 |
| Pge2DIPLO  | GQ886254 |
| Pma2ARACH  | GQ886255 |
| Pno2ONYCH  | GQ886256 |
| Pol2DIPLO  | GQ886257 |
| PsaARCHEO  | GQ886258 |
| PwhARACH   | GQ886259 |
| ScolCHILO  | GQ886260 |
| Scu3SYMPH  | GQ886261 |
| SkleOST    | GQ886262 |
| SpoCHILO   | GQ886263 |
| StpARACH   | GQ886264 |
| Tom2COLL   | GQ886265 |

8018fin:

|            |          |
|------------|----------|
| AchARACH   | GQ886266 |
| AmaDIPLO   | GQ886267 |
| Amb2ARACH  | GQ886268 |
| Arg2BIURA  | GQ886269 |
| Asa3BRANCH | GQ886270 |
| CfrTHECOS  | GQ886271 |
| ClizYGEN   | GQ886272 |
| Col2PYCNO  | GQ886273 |
| Cro2XIPHOS | GQ886274 |
| Crp2ARACH  | GQ886275 |
| Ctas2CHILO | GQ886276 |
| Din2ARACH  | GQ886277 |
| DmaBRANCH  | GQ886278 |
| EafCOPE    | GQ886279 |
| EgigARACH  | GQ886280 |
| EinEPHEM   | GQ886281 |
| HapaOST    | GQ886282 |
| HariARACH  | GQ886283 |
| HmaCEPHAL  | GQ886284 |
| HspARACH   | GQ886285 |
| IpumARACH  | GQ886286 |
| IveODONAT  | GQ886287 |
| JapDIPLUR  | GQ886288 |
| LeanTHECOS | GQ886289 |
| Lle2BRANCH | GQ886290 |
| LlyODONAT  | GQ886291 |
| LnigARACH  | GQ886292 |
| LynBRANCH  | GQ886293 |
| MayEPHEM   | GQ886294 |
| NmeZYGEN   | GQ886295 |
| OimCOLL    | GQ886296 |
| PamNEOPT   | GQ886297 |
| PepONYCH   | GQ886298 |
| Pma2ARACH  | GQ886299 |
| Pno2ONYCH  | GQ886300 |
| PsaARCHEO  | GQ886301 |
| PwhARACH   | GQ886302 |
| ScolCHILO  | GQ886303 |
| Scu3SYMPH  | GQ886304 |
| SkleOST    | GQ886305 |
| SpoCHILO   | GQ886306 |
| StpARACH   | GQ886307 |
| Tom2COLL   | GQ886308 |
| UfsBRANCH  | GQ886309 |

8028fin:

|            |          |
|------------|----------|
| AchARACH   | GQ886310 |
| AdoNEOPT   | GQ886311 |
| AeliPYCNO  | GQ886312 |
| AhiPYCNO   | GQ886313 |
| AmaDIPLO   | GQ886314 |
| Amb2ARACH  | GQ886315 |
| BbaTHECOS  | GQ886316 |
| CfrTHECOS  | GQ886317 |
| Col2PYCNO  | GQ886318 |
| Crp2ARACH  | GQ886319 |
| Ctas2CHILO | GQ886320 |
| DtyMYSTACO | GQ886321 |
| EafCOPE    | GQ886322 |
| ElePYCNO   | GQ886323 |
| ErwONYCH   | GQ886324 |
| Han2SYMPH  | GQ886325 |
| HapaOST    | GQ886326 |
| HariARACH  | GQ886327 |
| HmaCEPHAL  | GQ886328 |
| HspARACH   | GQ886329 |
| IveODONAT  | GQ886330 |
| JapDIPLUR  | GQ886331 |
| LemMALA    | GQ886332 |
| Lle2BRANCH | GQ886333 |
| LlyODONAT  | GQ886334 |
| LoxTHECOS  | GQ886335 |
| MtdTARD    | GQ886336 |
| OimCOLL    | GQ886337 |
| PepONYCH   | GQ886338 |
| Pge2DIPLO  | GQ886339 |
| Pma2ARACH  | GQ886340 |
| Pno2ONYCH  | GQ886341 |
| PsaARCHEO  | GQ886342 |
| PwhARACH   | GQ886343 |
| ScolCHILO  | GQ886344 |
| Scu3SYMPH  | GQ886345 |
| SkleOST    | GQ886346 |
| SpoCHILO   | GQ886347 |
| StpARACH   | GQ886348 |

8029fin:

|            |          |
|------------|----------|
| A369COPE   | GQ886349 |
| AarPENTA   | GQ886350 |
| AchARACH   | GQ886351 |
| AdoNEOPT   | GQ886352 |
| AeliPYCNO  | GQ886353 |
| AhiPYCNO   | GQ886354 |
| AmaDIPLO   | GQ886355 |
| Amb2ARACH  | GQ886356 |
| Arg2BIURA  | GQ886357 |
| Asa3BRANCH | GQ886358 |
| Avu3MALA   | GQ886359 |
| BbaTHECOS  | GQ886360 |
| ClizYGEN   | GQ886361 |
| Col2PYCNO  | GQ886362 |
| Crp2ARACH  | GQ886363 |
| Ctas2CHILO | GQ886364 |
| Din2ARACH  | GQ886365 |
| DmaBRANCH  | GQ886366 |
| DtyMYSTACO | GQ886367 |
| EafCOPE    | GQ886368 |
| EfrDIPLUR  | GQ886369 |
| EgigARACH  | GQ886370 |
| EinEPHEM   | GQ886371 |
| ElePYCNO   | GQ886372 |
| ErwONYCH   | GQ886373 |
| EuryPAURO  | GQ886374 |
| Han2SYMPH  | GQ886375 |
| HapaOST    | GQ886376 |
| HariARACH  | GQ886377 |
| HmaCEPHAL  | GQ886378 |
| HspARACH   | GQ886379 |
| IpumARACH  | GQ886380 |
| IveODONAT  | GQ886381 |
| JapDIPLUR  | GQ886382 |
| LemMALA    | GQ886383 |
| Lle2BRANCH | GQ886384 |
| LlyODONAT  | GQ886385 |
| LnigARACH  | GQ886386 |
| LoxTHECOS  | GQ886387 |
| MayEPHEM   | GQ886388 |
| MbaARCHEO  | GQ886389 |
| NeoMALA    | GQ886390 |
| NmeZYGEN   | GQ886391 |
| OimCOLL    | GQ886392 |
| PamNEOPT   | GQ886393 |
| PepONYCH   | GQ886394 |
| Pge2DIPLO  | GQ886395 |
| Pma2ARACH  | GQ886396 |
| Pno2ONYCH  | GQ886397 |
| Pol2DIPLO  | GQ886398 |
| PsaARCHEO  | GQ886399 |
| PwhARACH   | GQ886400 |
| ScolCHILO  | GQ886401 |
| Scu3SYMPH  | GQ886402 |
| SpoCHILO   | GQ886403 |
| StpARACH   | GQ886404 |
| Tom2COLL   | GQ886405 |
| UfsBRANCH  | GQ886406 |



8053fin:

|            |          |
|------------|----------|
| AarPENTA   | GQ886407 |
| AchARACH   | GQ886408 |
| AdoNEOPT   | GQ886409 |
| AeliPYCNO  | GQ886410 |
| AhiPYCNO   | GQ886411 |
| AmaDIPLO   | GQ886412 |
| Amb2ARACH  | GQ886413 |
| Asa3BRANCH | GQ886414 |
| Avu3MALA   | GQ886415 |
| BbaTHECOS  | GQ886416 |
| CfrTHECOS  | GQ886417 |
| ClizYGEN   | GQ886418 |
| Col2PYCNO  | GQ886419 |
| Cro2XIPHOS | GQ886420 |
| Crp2ARACH  | GQ886421 |
| Din2ARACH  | GQ886422 |
| DtyMYSTACO | GQ886423 |
| EfrDIPLUR  | GQ886424 |
| EgigARACH  | GQ886425 |
| EinEPHEM   | GQ886426 |
| ElePYCNO   | GQ886427 |
| ErwONYCH   | GQ886428 |
| EuryPAURO  | GQ886429 |
| Han2SYMPH  | GQ886430 |
| HariARACH  | GQ886431 |
| HmaCEPHAL  | GQ886432 |
| HspARACH   | GQ886433 |
| IpumARACH  | GQ886434 |
| IveODONAT  | GQ886435 |
| JapDIPLUR  | GQ886436 |
| LeanTHECOS | GQ886437 |
| LemMALA    | GQ886438 |
| LlyODONAT  | GQ886439 |
| LnigARACH  | GQ886440 |
| LoxTHECOS  | GQ886441 |
| LynBRANCH  | GQ886442 |
| MayEPHEM   | GQ886443 |
| NeoMALA    | GQ886444 |
| NmeZYGEN   | GQ886445 |
| OimCOLL    | GQ886446 |
| PamNEOPT   | GQ886447 |
| PepONYCH   | GQ886448 |
| Pma2ARACH  | GQ886449 |
| Pno2ONYCH  | GQ886450 |
| Pol2DIPLO  | GQ886451 |
| PsaARCHEO  | GQ886452 |
| PwhARACH   | GQ886453 |
| ScolCHILO  | GQ886454 |
| Scu3SYMPH  | GQ886455 |
| SkleOST    | GQ886456 |
| SpoCHILO   | GQ886457 |
| Tom2COLL   | GQ886458 |
| UfsBRANCH  | GQ886459 |

8070fin:

|            |          |
|------------|----------|
| A369COPE   | GQ886460 |
| AarPENTA   | GQ886461 |
| AchARACH   | GQ886462 |
| AdoNEOPT   | GQ886463 |
| AhiPYCNO   | GQ886464 |
| AmaDIPLO   | GQ886465 |
| Amb2ARACH  | GQ886466 |
| BbaTHECOS  | GQ886467 |
| CfrTHECOS  | GQ886468 |
| CliZYGEN   | GQ886469 |
| Cro2XIPHOS | GQ886470 |
| Crp2ARACH  | GQ886471 |
| Ctas2CHILO | GQ886472 |
| Din2ARACH  | GQ886473 |
| DmaBRANCH  | GQ886474 |
| EafCOPE    | GQ886475 |
| EfrDIPLUR  | GQ886476 |
| EinEPHEM   | GQ886477 |
| EuryPAURO  | GQ886478 |
| HariARACH  | GQ886479 |
| HmaCEPHAL  | GQ886480 |
| HspARACH   | GQ886481 |
| IpumARACH  | GQ886482 |
| IveODONAT  | GQ886483 |
| JapDIPLUR  | GQ886484 |
| LeanTHECOS | GQ886485 |
| LemMALA    | GQ886486 |
| Lle2BRANCH | GQ886487 |
| LlyODONAT  | GQ886488 |
| LnigARACH  | GQ886489 |
| LoxTHECOS  | GQ886490 |
| LynBRANCH  | GQ886491 |
| MayEPHEM   | GQ886492 |
| MbaARCHEO  | GQ886493 |
| NmeZYGEN   | GQ886494 |
| PamNEOPT   | GQ886495 |
| PepONYCH   | GQ886496 |
| Pge2DIPLO  | GQ886497 |
| Pma2ARACH  | GQ886498 |
| Pol2DIPLO  | GQ886499 |
| PsaARCHEO  | GQ886500 |
| PwhARACH   | GQ886501 |
| ScolCHILO  | GQ886502 |
| Scu3SYMPH  | GQ886503 |
| SpoCHILO   | GQ886504 |

8091fin:

|            |          |
|------------|----------|
| A369COPE   | GQ886505 |
| AarPENTA   | GQ886506 |
| AchARACH   | GQ886507 |
| AhiPYCNO   | GQ886508 |
| Amb2ARACH  | GQ886509 |
| Asa3BRANCH | GQ886510 |
| Avu3MALA   | GQ886511 |
| Cro2XIPHOS | GQ886512 |
| Din2ARACH  | GQ886513 |
| EafCOPE    | GQ886514 |
| EgigARACH  | GQ886515 |
| EinEPHEM   | GQ886516 |
| Han2SYMPH  | GQ886517 |
| HariARACH  | GQ886518 |
| HspARACH   | GQ886519 |
| IveODONAT  | GQ886520 |
| JapDIPLUR  | GQ886521 |
| LemMALA    | GQ886522 |
| Lle2BRANCH | GQ886523 |
| LlyODONAT  | GQ886524 |
| LnigARACH  | GQ886525 |
| LoxTHECOS  | GQ886526 |
| LynBRANCH  | GQ886527 |
| MbaARCHEO  | GQ886528 |
| NeoMALA    | GQ886529 |
| NmeZYGEM   | GQ886530 |
| PamNEOPT   | GQ886531 |
| PepONYCH   | GQ886532 |
| Pge2DIPLO  | GQ886533 |
| Pno2ONYCH  | GQ886534 |
| Pol2DIPLO  | GQ886535 |
| PsaARCHEO  | GQ886536 |
| PwhARACH   | GQ886537 |
| StpARACH   | GQ886538 |
| UfsBRANCH  | GQ886539 |

## acc:

|            |          |
|------------|----------|
| A369COPE   | GQ886540 |
| AeliPYCNO  | GQ886541 |
| AhiPYCNO   | GQ886542 |
| Amb2ARACH  | GQ886543 |
| Arg2BIURA  | GQ886544 |
| Asa3BRANCH | GQ886545 |
| Avu3MALA   | GQ886546 |
| BbaTHECOS  | GQ886547 |
| CfrTHECOS  | GQ886548 |
| ClizYGEN   | GQ886549 |
| Col2PYCNO  | GQ886550 |
| Cro2XIPHOS | GQ886551 |
| Crp2ARACH  | GQ886552 |
| Ctas2CHILO | GQ886553 |
| Din2ARACH  | GQ886554 |
| DmaBRANCH  | GQ886555 |
| DtyMYSTACO | GQ886556 |
| EafCOPE    | GQ886557 |
| EgigARACH  | GQ886558 |
| ElePYCNO   | GQ886559 |
| ErwONYCH   | GQ886560 |
| EuryPAURO  | GQ886561 |
| HariARACH  | GQ886562 |
| HmaCEPHAL  | GQ886563 |
| HspARACH   | GQ886564 |
| IpumARACH  | GQ886565 |
| LeanTHECOS | GQ886566 |
| LemMALA    | GQ886567 |
| Lle2BRANCH | GQ886568 |
| MtdTARD    | GQ886569 |
| NeoMALA    | GQ886570 |
| OimCOLL    | GQ886571 |
| PamNEOPT   | GQ886572 |
| PepONYCH   | GQ886573 |
| Pma2ARACH  | GQ886574 |
| Pno2ONYCH  | GQ886575 |
| PsaARCHEO  | GQ886576 |
| PwhARACH   | GQ886577 |
| ScolCHILO  | GQ886578 |
| SpoCHILO   | GQ886579 |
| StpARACH   | GQ886580 |
| Tom2COLL   | GQ886581 |
| UfsBRANCH  | GQ886582 |

## aspec2\_6:

|            |          |
|------------|----------|
| AeliPYCNO  | GQ886583 |
| AhiPYCNO   | GQ886584 |
| Amb2ARACH  | GQ886585 |
| Arg2BIURA  | GQ886586 |
| Avu3MALA   | GQ886587 |
| BbaTHECOS  | GQ886588 |
| CfrTHECOS  | GQ886589 |
| ClizYGEN   | GQ886590 |
| Col2PYCNO  | GQ886591 |
| Cro2XIPHOS | GQ886592 |
| Crp2ARACH  | GQ886593 |
| Ctas2CHILO | GQ886594 |
| DmaBRANCH  | GQ886595 |
| EgigARACH  | GQ886596 |
| ElePYCNO   | GQ886597 |
| ErwONYCH   | GQ886598 |
| HariARACH  | GQ886599 |
| HmaCEPHAL  | GQ886600 |
| HspARACH   | GQ886601 |
| JapDIPLUR  | GQ886602 |
| LeanTHECOS | GQ886603 |
| LemMALA    | GQ886604 |
| MayEPHEM   | GQ886605 |
| NeoMALA    | GQ886606 |
| OimCOLL    | GQ886607 |
| PamNEOPT   | GQ886608 |
| PsaARCHEO  | GQ886609 |
| ScolCHILO  | GQ886610 |
| SpoCHILO   | GQ886611 |
| Tom2COLL   | GQ886612 |
| UfsBRANCH  | GQ886613 |

## aspec11\_12:

|            |          |
|------------|----------|
| AeliPYCNO  | GQ886614 |
| AhiPYCNO   | GQ886615 |
| Amb2ARACH  | GQ886616 |
| Arg2BIURA  | GQ886617 |
| Asa3BRANCH | GQ886618 |
| Avu3MALA   | GQ886619 |
| BbaTHECOS  | GQ886620 |
| CfrTHECOS  | GQ886621 |
| ClizYGEN   | GQ886622 |
| Col2PYCNO  | GQ886623 |
| Cro2XIPHOS | GQ886624 |
| Crp2ARACH  | GQ886625 |
| Ctas2CHILO | GQ886626 |
| Din2ARACH  | GQ886627 |
| DmaBRANCH  | GQ886628 |
| DtyMYSTACO | GQ886629 |
| EafCOPE    | GQ886630 |
| EgigARACH  | GQ886631 |
| ElePYCNO   | GQ886632 |
| HariARACH  | GQ886633 |
| HmaCEPHAL  | GQ886634 |
| JapDIPLUR  | GQ886635 |
| LeanTHECOS | GQ886636 |
| LemMALA    | GQ886637 |
| Lle2BRANCH | GQ886638 |
| MayEPHEM   | GQ886639 |
| MtdTARD    | GQ886640 |
| NeoMALA    | GQ886641 |
| OimCOLL    | GQ886642 |
| PamNEOPT   | GQ886643 |
| PepONYCH   | GQ886644 |
| PsaARCHEO  | GQ886645 |
| PwhARACH   | GQ886646 |
| ScolCHILO  | GQ886647 |
| SpoCHILO   | GQ886648 |
| Tom2COLL   | GQ886649 |
| UfsBRANCH  | GQ886650 |

## aspec19\_21:

|            |          |
|------------|----------|
| AeliPYCNO  | GQ886651 |
| AhiPYCNO   | GQ886652 |
| Amb2ARACH  | GQ886653 |
| Arg2BIURA  | GQ886654 |
| Asa3BRANCH | GQ886655 |
| Avu3MALA   | GQ886656 |
| BbaTHECOS  | GQ886657 |
| CfrTHECOS  | GQ886658 |
| ClizYGEN   | GQ886659 |
| Col2PYCNO  | GQ886660 |
| Crp2ARACH  | GQ886661 |
| Ctas2CHILO | GQ886662 |
| Din2ARACH  | GQ886663 |
| DmaBRANCH  | GQ886664 |
| DtyMYSTACO | GQ886665 |
| EafCOPE    | GQ886666 |
| EgigARACH  | GQ886667 |
| ElePYCNO   | GQ886668 |
| ErwONYCH   | GQ886669 |
| EuryPAURO  | GQ886670 |
| Han2SYMPH  | GQ886671 |
| HmaCEPHAL  | GQ886672 |
| IpumARACH  | GQ886673 |
| JapDIPLUR  | GQ886674 |
| LeanTHECOS | GQ886675 |
| LemMALA    | GQ886676 |
| Lle2BRANCH | GQ886677 |
| MayEPHEM   | GQ886678 |
| MtdTARD    | GQ886679 |
| NeoMALA    | GQ886680 |
| OimCOLL    | GQ886681 |
| PamNEOPT   | GQ886682 |
| PepONYCH   | GQ886683 |
| Pno2ONYCH  | GQ886684 |
| PsaARCHEO  | GQ886685 |
| PwhARACH   | GQ886686 |
| ScolCHILO  | GQ886687 |
| SpoCHILO   | GQ886688 |
| Tom2COLL   | GQ886689 |
| UfsBRANCH  | GQ886690 |

efla:

|            |          |
|------------|----------|
| AarPENTA   | GQ886691 |
| AdoNEOPT   | GQ886692 |
| AeliPYCNO  | GQ886693 |
| AhiPYCNO   | GQ886694 |
| DmaBRANCH  | GQ886695 |
| DtyMYSTACO | GQ886696 |
| EgigARACH  | GQ886697 |
| EinEPHEM   | GQ886698 |
| ErwONYCH   | GQ886699 |
| IpumARACH  | GQ886700 |
| IveODONAT  | GQ886701 |
| LlyODONAT  | GQ886702 |
| LnigARACH  | GQ886703 |
| PepONYCH   | GQ886704 |
| Pno2ONYCH  | GQ886705 |
| PwhARACH   | GQ886706 |



ef2:

|            |          |
|------------|----------|
| AarPENTA   | GQ886707 |
| AchARACH   | GQ886708 |
| AdoNEOPT   | GQ886709 |
| AeliPYCNO  | GQ886710 |
| AhiPYCNO   | GQ886711 |
| Amb2ARACH  | GQ886712 |
| Crp2ARACH  | GQ886713 |
| Din2ARACH  | GQ886714 |
| DmaBRANCH  | GQ886715 |
| DtyMYSTACO | GQ886716 |
| EgigARACH  | GQ886717 |
| EinEPHEM   | GQ886718 |
| ErwONYCH   | GQ886719 |
| HariARACH  | GQ886720 |
| HspARACH   | GQ886721 |
| IpumARACH  | GQ886722 |
| LlyODONAT  | GQ886723 |
| LnigARACH  | GQ886724 |
| PepONYCH   | GQ886725 |
| Pma2ARACH  | GQ886726 |
| PwhARACH   | GQ886727 |
| StpARACH   | GQ886728 |

## polii:

|            |          |
|------------|----------|
| AarPENTA   | GQ886729 |
| AchARACH   | GQ886730 |
| AdoNEOPT   | GQ886731 |
| AeliPYCNO  | GQ886732 |
| AhiPYCNO   | GQ886733 |
| Amb2ARACH  | GQ886734 |
| Crp2ARACH  | GQ886735 |
| Ctas2CHILO | GQ886736 |
| Din2ARACH  | GQ886737 |
| DmaBRANCH  | GQ886738 |
| EgigARACH  | GQ886739 |
| EinEPHEM   | GQ886740 |
| ErwONYCH   | GQ886741 |
| IpumARACH  | GQ886742 |
| IveODONAT  | GQ886743 |
| LlyODONAT  | GQ886744 |
| LnigARACH  | GQ886745 |
| PepONYCH   | GQ886746 |
| Pma2ARACH  | GQ886747 |
| Pno2ONYCH  | GQ886748 |
| PwhARACH   | GQ886749 |
| StpARACH   | GQ886750 |

**Previously cited GenBank accession numbers for all genes except EF-1alpha, EF-2 and PolIII can be found in:**

Ref. 16 (Regier, J.C., Shultz, J.W., Ganley, A.R.D., Hussey, A., Shi, D., Ball, B. Stajich, J.E., Cummings, M.P., Martin, J.W., and Cunningham, C.W. 2008. Resolving Arthropod Phylogeny: Exploring Phylogenetic Signal within 41kb of Protein-coding Nuclear Gene Sequence. *Syst. Biol.* 57: 920-938.)

**Previously cited GenBank accession numbers for EF-1alpha, EF-2 and PolIII can be found in:**

Regier, J.C., J.W. Shultz, and R.E. Kambic. 2005. Pancrustacean phylogeny: Hexapods are terrestrial crustaceans and maxillopods are not monophyletic. *Proc. R. Soc. Lond. B* 272:305-401.

Regier, J.C., H.M. Wilson, and J.W. Shultz. 2005. Phylogenetic analysis of Myriapoda using three nuclear protein-coding genes. *Mol. Phylog. Evol.* 34:147-158.

**Supplementary Table 5.** Expanded outgroup sampling.

To extend our outgroup sampling beyond the Onychophora and Tardigrada, we retrieved orthologous sequences for five distantly related taxa (*Priapululus caudatus* (Priapulida), *Caenorhabditis elegans* (Nematoda), *Brugia malayi* (Nematoda), *Lottia gigantea* (Mollusca) and *Homo sapiens* (Deuterostomia)) from whole genome databases (*C. elegans*, *B. malayi*, *H. sapiens*) and an EST database (*P. caudatus*) at Genbank, and from an EST database (*L. gigantea*) at the DOE Joint Genome Institute. Orthologous sequences were identified by blasting each gene as a translated nucleotide query against the translated nucleotide database (NCBI tblastx). Only those sequences were included that matched significantly better over almost the entire query length than any of the other blast hits. The amino acid translations of the selected nucleotide sequences were downloaded and aligned against our existing, masked alignment by using MAFFT (version 6.603b; Ref. 35) with default settings. Masked areas of the existing alignment, and occasionally short stretches of unalignable individual sequences that bordered the mask, were subsequently deleted from the alignment in Geneious (version 4.7.6; www.geneious.com).

**Accession numbers:**

***Brugia malayi*:** XP\_001893622.1, XP\_001901506.1, XP\_001895617.1, XP\_001895919.1, XP\_001894567.1, XP\_001897269.1, XP\_001901913.1, XP\_001900309.1, XP\_001896500.1, XP\_001895013.1, XP\_001897611.1, XP\_001895791.1, XP\_001902388.1, XP\_001902446.1, XP\_001898682.1, XP\_001899038.1, XP\_001899767.1, XP\_001899767.1, XP\_001891813.1, XP\_001898798.1, XP\_001900869.1, XP\_001897626.1, XP\_001897627.1, XP\_001901951.1, XP\_001896639.1, XP\_001898305.1, XP\_001896237.1, XP\_001899825.1, XP\_001894503.1, XP\_001901400.1, XP\_001894060.1, XP\_001899288.1, XP\_001894336.1, XP\_001898894.1, XP\_001900677.1, XP\_001900562.1, XP\_001900562.1, XP\_001901105.1, XP\_001894202.1, XP\_001902057.1, XP\_001901357.1, XP\_001895763.1, XP\_001895763.1, XP\_001896149.1, XP\_001892909.1, XP\_001897606.1, XP\_001901433.1, XP\_001891856.1, XP\_001897999.1, XP\_001899519.1, XP\_001896989.1, XP\_001895649.1, XP\_001900986.1, XP\_001893872.1, XP\_001899464.1, XP\_001897022.1, XP\_001897022.1, XP\_001897022.1, XP\_001896880.1, XP\_001897144.1, XP\_001898310.1

***Caenorhabditis elegans*:** NP\_498913.2, NP\_496736.1, NP\_001022078.1, NP\_497139.1, NP\_492303.1, NP\_001022778.1, NP\_496563.1, NP\_504661.1, NP\_001076631.1, NP\_497837.1, NP\_501507.1, NP\_501064.1, NP\_001023374.1, NP\_495838.2, NP\_494974.2, NP\_497853.1, NP\_491248.1, NP\_502997.1, NP\_498785.1, NP\_498785.1, NP\_001024331.1, NP\_502129.1, NP\_497235.2, NP\_001022416.1, NP\_509361.1, NP\_508420.1, NP\_508420.1, NP\_001023732.1, NP\_507909.1, NP\_509429.1, NP\_498260.2, NP\_491281.1, NP\_501392.1, NP\_491165.2, NP\_502812.1, NP\_001024842.1, NP\_741148.2, NP\_498047.1, NP\_498047.1, NP\_491515.2, NP\_001022614.1, NP\_501998.1, NP\_493349.1, NP\_499758.1, NP\_499260.1, NP\_499260.1, NP\_492591.1, NP\_509572.1, NP\_508184.2, NP\_492811.1, NP\_001040861.1, NP\_001021838.1, NP\_508711.1, NP\_508537.1, NP\_508537.1, NP\_508537.1, NP\_498520.1, NP\_492457.1, NP\_500523.3

***Homo sapiens*:** NP\_002009.1, NP\_005580.1, NP\_001014794.1, NP\_001244.1, NP\_004437.2, NP\_036299.1, NP\_003866.1, NP\_064502.9, NP\_003127.1, NP\_002100.2, NP\_004332.2, NP\_631895.1, NP\_036565.2, NP\_079094.1, NP\_006436.3, NP\_006436.3, NP\_001005360.1, NP\_000393.4, NP\_001610.2, NP\_004517.2, NP\_000251.3, NP\_000251.3, NP\_002585.2, NP\_004791.1, NP\_001596.2, NP\_116082.1, NP\_005042.1, NP\_001349.2, NP\_000929.1, NP\_000929.1, NP\_004682.2, NP\_005462.1, NP\_004850.1, NP\_004850.1, NP\_060931.2, NP\_858058.1, NP\_002798.2, NP\_055302.1, NP\_001035957.1, NP\_060895.1, NP\_055448.1, NP\_000166.2, NP\_001684.2, NP\_001084.3, NP\_001123910.1, NP\_001123910.1, NP\_001123910.1, NP\_001952.1, NP\_000928.1

***Lottia gigantea*:** 202563, 191244, 166805, 104768, 206571, 183856, 207720, 189484, 207454, 205661, 93207, 206258, 205645, 178633, 224575, 137856, 207258, 63809, 217351, 217351, 109709, 186757, 175153, 207293,

207807, 158839, 178090, 206057, 92440, 205596, 184781, 91712, 207403, 86084, 194060, 153655, 53097, 206585, 91606, 192032, 91620, 91620, 205919, 52835, 62006, 239037, 234519, 178765, 178765, 206692, 228184, 206326, 205944, 111316, 117227, 132663, 225779, 177207, 178790, 178589, 199490, 91245, 91245, 91245, 239270, 180085, 180008

*Priapulus caudatus*: AAT06252.1, ABM05772.1, AAT06193.1, ABB29633.1, ABM74385.1
